Myristate as a carbon and energy source for the asymbiotic growth of the arbuscular  
mycorrhizal fungus *Rhizophagus irregularis*

Yuta Sugiura<sup>a,1</sup>, Rei Akiyama<sup>a,1</sup>, Sachiko Tanaka<sup>b</sup>, Koji Yano<sup>b</sup>, Hiromu Kameoka<sup>c</sup>, Masayoshi  
Kawaguchi<sup>b,d</sup>, Kohki Akiyama<sup>c</sup>, and Katsuharu Saito<sup>e,2</sup>

<sup>a</sup>Graduate School of Science and Technology, Shinshu University, Minamiminowa, Nagano  
399-4598, Japan; <sup>b</sup>Division of Symbiotic Systems, National Institute for Basic Biology,  
Okazaki, Aichi 444-0867, Japan; <sup>c</sup>Graduate School of Life and Environmental Sciences, Osaka  
Prefecture University, Sakai, Osaka 599-8531, Japan; <sup>d</sup>Department of Basic Biology, School of  
Life Science, Graduate University for Advanced Studies (SOKENDAI), Okazaki, Aichi 444-  
0867, Japan; and <sup>e</sup>Faculty of Agriculture, Shinshu University, Minamiminowa, Nagano 399-  
4598, Japan

<sup>1</sup>Y.S. and R.A. contributed equally to this work.

<sup>2</sup>To whom correspondence should be addressed. Email: [saitok@shinshu-u.ac.jp](mailto:saitok@shinshu-u.ac.jp).

Keywords: fatty acid auxotroph | immobilized cell culture | mycorrhizal symbiosis | pure culture

## Abstract

Arbuscular mycorrhiza (AM) is one of the most widespread mutualistic symbioses, which is formed between the majority of land plants and soil-borne fungi belonging to Glomeromycotina. AM fungi are obligate symbionts that cannot complete their natural life cycle without a host. Recent evidence suggests that lipids synthesized by a host are transferred to AM fungi that possess no fatty acid synthase genes in their genome and that mutations in lipid biosynthesis-related genes of the host lead the symbiotic interaction to fail (1-3). We hypothesized that lipids derived from plants are crucial for AM fungal growth and reproduction. In this study, we evaluated whether AM fungi can grow on medium supplied with fatty acids under asymbiotic conditions without the host. Myristate led to an extensive hyphal growth of *Rhizophagus irregularis* and an increase in biomass production. Other examined fatty acids showed no effect on biomass production. Myristate also induced secondary spore formation. The myristate-induced spores can germinate, colonize carrot hairy roots, and form the next generation of mature daughter spores. A fluorescently labeled fatty acid probe was taken up by branched hyphae of AM fungi. Tracer experiments using <sup>13</sup>C-labeled myristic acid showed that myristate and its metabolites were utilized for the synthesis of triacylglycerol and cell wall components of AM fungi. Furthermore, myristate activated ATP generation in the fungal hyphae. Here we demonstrate that myristate is utilized as a carbon and energy source for biomass production and

sporulation under asymbiotic conditions.

## Introduction

Arbuscular mycorrhizal (AM) fungi belonging to the subphylum Glomeromycotina (4) form symbiotic associations with over 70% of land plant species (5). AM fungi provide hosts with minerals taken up via hyphal networks in soil and in return receive carbon sources, such as sugars and lipids derived from plant photosynthates. This is regarded as an obligate symbiotic relationship, where the life cycle of AM fungi is completed through colonization with their host. Only a few reports have been published on AM fungal culture without hosts. One report showed that the co-cultivation of the AM fungus *Glomus intraradices* with strains of *Paenibacillus validus* separated from each other with dialysis membranes induced secondary spore formation of the AM fungus (6). Another study reported that some fatty acids, including palmitoleic acid and (*S*)-12-methyltetradecanoic acid, induced fertile secondary spores in asymbiotic cultures of AM fungi (7). These results suggest that AM fungi may be cultured independently from host plants under artificial conditions. In nature, the life cycle of AM fungi proceeds as follows. Resting spores of AM fungi germinate, and then germ tubes emerge from the spores and elongate into the soil. After colonization into plant roots, AM fungi form a highly branched hyphal structure, called an arbuscule, in plant cortical cells, which is a site of nutrient exchange

55 between AM fungi and their hosts. After receiving carbon sources from their hosts, AM fungi  
56 activate the formation of extraradical hyphal networks in soil and form spores on their hyphae.  
57 A key step of AM fungal growth and reproduction is to obtain carbon sources from their hosts  
58 for the production of energy and the carbon skeleton of the fungal cell components. Tracer  
59 experiments and NMR analyses show that hexoses transfer to AM fungi as a carbon source (8-  
60 10). Several AM fungal monosaccharide transporters have been identified (11-13). Recently,  
61 lipids derived from plants have been proven to be another carbon source (1-3, 14, 15). No fatty  
62 acid biosynthesis activity in extraradical hyphae has been detected, so lipids were assumed to  
63 be synthesized in intraradical hyphae and transferred to extraradical hyphae and spores (10, 16).  
64 However, AM fungi have no cytosolic fatty acid synthases involved in *de novo* fatty acid  
65 biosynthesis in their genomes, indicating that AM fungi cannot produce long chain fatty acids  
66 by themselves (17-20). During AM symbiosis, plants activate fatty acid biosynthesis and  
67 transfer lipids, presumably 16:0  $\beta$ -monoacylglycerol ( $\beta$ -MAG), to AM fungi via arbuscules (1-  
68 3, 14, 15). In plant mutants that are defective in fatty acid biosynthetic genes, AM fungi cannot  
69 develop arbuscules and reduce colonization in roots. These results indicate that AM fungi  
70 require external fatty acids for their growth. Once AM fungi take up fatty acids, they can utilize  
71 them using fatty acid desaturase and elongase genes that are present in their genomes and  
72 expressed in intraradical hyphae (16-18, 20-23). Thus, we examined whether AM fungi can

grow and reproduce fertile spores through the application of fatty acids under asymbiotic conditions.

## Results

### Myristate activates AM fungal growth

Initially, we screened several fatty acids and  $\beta$ -MAGs to identify chemicals that promote AM fungal growth under asymbiotic conditions. These compounds were added to the modified *Saccharomyces cerevisiae* synthetic complete (SC) medium (*SI Appendix*, Table S1) with different dissolving methods: adding an aqueous solution of fatty acid salts, fatty acids and  $\beta$ -MAGs dissolved in ethanol, or fatty acids conjugated with bovine serum albumin (BSA). Fatty acid-BSA conjugates were dissolved to a final concentration of 0.5 mM, whereas potassium salts of fatty acids were converted into an insoluble form due to the formation of metal soap with  $\text{Ca}^{2+}$  and  $\text{Mg}^{2+}$  in SC medium. Moreover, fatty acids and  $\beta$ -MAGs were aggregated in the solid culture (*SI Appendix*, Fig. S1). In the absence of fatty acids, no biomass increase was detected in *R. irregularis* (Fig. 1A and B). After spore germination, *R. irregularis* generated a thick and short subtending hypha that soon branched to produce straight-growing thick hyphae (hereafter referred to as runner hyphae), with several thin lateral hyphae with a low level of ramification (Fig. 1D and E). The hyphal elongation ceased within one or two weeks after

germination. By contrast, myristates (C14:0) among the tested chemicals substantially increased fungal biomass regardless of the methods used for adding myristate (Fig. 1A). Fungal biomass continued to increase in the culture depending on the concentration of myristate (Fig. 1B). As a consequence, the total dry weight of the two-month-old colony at 1 mM potassium myristate doubled that of inoculated spores. Surprisingly, 16:0  $\beta$ -MAG and palmitate (16:0), candidate compounds released from arbusculated host cells during symbiosis (14, 15), did not increase biomass production. During cultivation with myristate, vigorous hyphal development and subsequent differentiation of secondary spores were observed (Fig. 1F–P and *SI Appendix*, Fig. S1). After germination, *R. irregularis* differentiated a few densely packed coil (DPC)-like structures from the runner hyphae in the vicinity of an inoculated spore (Fig. 1G). DPC is an extensively branched hyphal structure, which was first observed in *G. intraradices* co-cultivated with *P. validus* (24). *R. irregularis* elongated its runner hyphae as generating branched hyphae similar to branched absorbing structures (BAS) (25) and expanded its habitat by generating new runner hyphae (Fig. 1H–J). The short-branched hyphae (hereafter referred to as BAS) were formed at short intervals (Fig. 1K). Interestingly, at the beginning of the cultivation supplemented with potassium myristate, numerous precipitates of myristate salt were observed throughout the growth medium; however, the precipitates around actively growing hyphae were solubilized (Fig. 1H, I, and L). Myristate induced secondary spores,

which were frequently observed along the runner hyphae in the vicinity of the inoculated spores (Fig. 1M). Myristate-induced spores also occurred apically or intercalary along the lateral branches of the extensively growing runner hyphae (Fig. 1N and O). The size of the spores was approximately 50  $\mu\text{m}$  in diameter, which is almost half the size of inoculated spores (Fig. 1F, M, and P). In the presence of palmitoleic acid (C16:1  $\Delta^9$ ) in the medium, extensive hyphal branching and secondary spore formation was observed as reported by Kameoka et al. (7), although this was not associated with an increase in biomass (Fig. 1A and *SI Appendix*, Fig. S1B). When lauric acid (C12:0) was applied as a lauric acid–BSA conjugate, *R. irregularis* showed an active runner hyphae elongation with few DPC, BAS, or secondary spores (*SI Appendix*, Fig. S1C). However, this conjugate did not significantly increase fungal biomass (Fig. 1A). As the lauric acid–BSA conjugate was effective on hyphal elongation even at low concentrations (1 and 10  $\mu\text{M}$ ), lauric acid is not likely to be utilized as a macronutrient for *R. irregularis* (*SI Appendix*, Fig. 1D).

We further developed culture systems to promote fungal growth under asymbiotic conditions. First, we examined a liquid culture of the modified SC medium containing potassium myristate. The liquid culture was also effective for fungal biomass production (*SI Appendix*, Fig. S2A). After germination, precipitates of metal soaps attached to the hyphal surface (*SI Appendix*, Fig. S2B). The fungal hyphae continued to elongate and became tangled.

During fungal growth, the metal soaps on the surface gradually disappeared. Typical BAS was not recognized due to the aggregation of the fungal hyphae, although highly branched fine hyphae were observed in the presence of myristate (*SI Appendix*, Fig. S2C). In contrast to the solid culture, very few secondary spores formed in the liquid culture. Next, an immobilized cell culture system was tested, in which an inoculum of *R. irregularis* spores embedded in the center of a Phytigel tablet was incubated in modified SC liquid medium (*SI Appendix*, Fig. S3A). This culture system can prevent the aggregation of fungal hyphae and facilitate the diffusion of medium components in the Phytigel tablets. Notably, AM fungal growth in the immobilized cell culture system with potassium myristate was increased at 3–4-fold compared with that in the solid and liquid cultures (Fig. 1A and C; *SI Appendix*, Fig. S2A). The hyphal elongation was very active, and some hyphae spread out to the Phytigel tablets and continued to grow (Fig. 1Q and R and *SI Appendix*, Fig. S3B–D). The elongation pattern was similar to that in the solid culture. For instance, DPC-like structures, runner hyphae, BAS, and myristate-induced spores were observed (*SI Appendix*, Fig. S3E–I). The myristate-induced spores were still smaller than the inoculated spores (*SI Appendix*, Fig. S3J).

As monosaccharides are utilized by AM fungi as carbon sources during symbiosis (8-10), we examined whether monosaccharides are effective on fungal growth in an immobilized cell culture system. In the absence of potassium myristate, neither glucose nor xylose promoted



biomass production (Fig. 1C). Similarly, no additional effect of the monosaccharides to increase biomass production was detected in the combination with potassium myristate.

# **Myristate-induced spores have infection capability**

Myristate-induced spores began to differentiate from two weeks after inoculation in the solid medium. The number of myristate-induced spores increased with time and concentration of myristate and finally reached 1.4 spores per inoculated spore at 8 weeks post-inoculation (Fig. 2A). However, the spores were still half the size of the inoculated spores (Fig. 2B). In the immobilized cell culture system, the number of myristate-induced spores was equal to that in the solid culture, and the spores were further generated up to 2.5 per inoculated spore in the combination with xylose (Fig. 2C and *SI Appendix*, Fig. S4A). Although the spore size and thickness of spore walls were small (*SI Appendix*, Fig. S4B and Fig. S5A), the morphology of the myristate-induced spores resembled that of the symbiotically generated spores (*SI Appendix*, Fig. S5A). Both myristate-induced and symbiotically generated spores contained a large number of nuclei (*SI Appendix*, Fig. S5A). We further evaluated the capability of the myristate-induced spores as propagules. Forty-six percent of the myristate-induced spores were able to germinate (*SI Appendix*, Fig. S5B). The abundance of germ tubes from the induced spores was less than that from the symbiotically generated spores, possibly due to the small spore size (*SI Appendix*,

Fig. S5C). To test whether the myristate-induced spores can colonize plant roots, a single spore generated in the immobilized cell culture system with potassium myristate and xylose was inoculated to carrot hairy roots. In total, 245 spores were examined in six independent experiments. Some induced spores had infectivity to the hairy roots; and as a result, mature spores of the next generation were produced on the extraradical hyphae that emerged from the roots (Fig. 2D–G). Approximately half of the germinated spores can colonize hairy roots and produce daughter spores, albeit large variations in the germination and infectivity of spores were observed among the trials due to the experimental manipulations (*SI Appendix*, Table S3).

## **AM fungi utilize myristate as a carbon and energy source**

To address the use of fatty acids by AM fungi under asymbiotic conditions, we analyzed fatty acid uptake using a fluorescent derivative of fatty acid, C<sub>1</sub>-BODIPY 500/510 C<sub>12</sub>, in the immobilized cell culture system. The fluorescent probe was absorbed by the BAS (not the runner hyphae) within 10 min of the exposure (Fig. 3A). The probe was first taken up from the hyphal tips of BAS (Fig. 3A), and then the fluorescent signals were observed in lipid body-like structures (26, 27) in the runner hyphae over time, which were translocated by cytoplasmic streaming (*SI Appendix*, Movie S1). Long exposure of the probe showed that the signals were localized in the myristate-induced spores as well as BAS, runner hyphae, and DPC, but

181 inoculated parent spores were rarely labeled (*SI Appendix*, Fig. S6). Translocation of the  
182 fluorescent fatty acid probe to the myristate-induced spores prompted us to examine whether  
183 myristate is utilized as a component of the major storage lipid, triacylglycerol. We cultured *R.*  
184 *irregularis* in the medium supplemented with [1-<sup>13</sup>C]myristic acid. After extraction of the lipids  
185 from the fungal materials, triacylglycerol was purified through preparative TLC and analyzed  
186 by <sup>13</sup>C-NMR. In the spectrum, two peaks at 173.1 and 173.4 ppm (corresponding to the carboxyl  
187 carbons of acyl chains at the  $\alpha$  and  $\beta$  positions, respectively) were observed at a much higher  
188 intensity compared with those of triacylglycerol prepared from monoxenically cultured *R.*  
189 *irregularis* (Fig. 3B). This finding shows that exogenous myristate is incorporated into  
190 triacylglycerol, especially as acyl carboxyl components. To further examine whether myristate  
191 provides the carbon skeleton for fungal cell components, we applied [1-<sup>13</sup>C]myristate to the  
192 solid culture medium and analyzed cell wall components. After the extraction of fungal cell  
193 walls, chitin and chitosan in the cell walls were converted into glucosamine through acid  
194 hydrolysis. LC-MS analysis of the extracted glucosamine demonstrated that the relative ion  
195 intensity of M+1 was significantly higher in AM fungi supplemented with [1-<sup>13</sup>C]myristate  
196 (mean 14.6%) than in those supplemented with non-labeled myristate (6.5%). This finding  
197 indicates that external myristate was taken up by *R. irregularis* and utilized for the biosynthesis  
198 of chitin and chitosan of the fungal cell walls (Fig. 3C). To evaluate myristate as an energy

source, ATP production was measured after the application of myristate. We applied myristate to germinating hyphae and measured ATP content at 12 h after application. ATP content increased by 2.4-fold in the presence of myristate compared with that in the absence of myristate (Fig. 3D). When carbonyl cyanide m-chlorophenylhydrazone (CCCP), an inhibitor of depolarization of mitochondrial membrane potential, was simultaneously applied to the hyphae, ATP content did not increase independently of fatty acid application. We also confirmed that potassium myristate activated gene expression involved in  $\beta$ -oxidation, the glyoxylate cycle, gluconeogenesis, and the TCA cycle at 3 h after the application (Fig. 3E). Interestingly, a gene encoding *N*-myristoyl transferase (NMT), which catalyzes the myristoylation of proteins was upregulated by myristate.

## Discussion

AM fungi have an obligate biotrophic lifestyle, so these fungi cannot possibly grow and survive without host-derived nutrients. Recently, AM fungi have been shown to receive lipids via arbuscules from the host (1-3, 14, 15); however, the availability of lipids as nutrient is largely unknown. Here we show that myristate (C14:0) is used for the hyphal growth of *R. irregularis* as a carbon and energy source under asymbiotic conditions, which provides the first evidence of the increase of AM fungal biomass in a pure culture system. Furthermore, we confirmed that

217 myristate-induced spores are infective propagules capable of generating symbiotic daughter  
 218 spores. Based on lipid profile analyses of plant mutants defective in arbuscule formation, 16:0  
 219  $\beta$ -MAG or its related chemicals are transferred to AM fungi from the host under symbiotic  
 220 conditions (1-3, 14, 15). Recently, palmitoleic acid, a monounsaturated C16 fatty acid, has been  
 221 shown to induce hyphal branching and fertile spores in the absence of a host (7). However, fatty  
 222 acids and  $\beta$ -MAGs except for myristate were ineffective in biomass production in our culture  
 223 conditions. From our result that the fluorescently labelled fatty acid derivative C<sub>1</sub>-BODIPY  
 224 500/510 C<sub>12</sub> was accumulated in AM fungal hyphae, fatty acids are likely to be non-specifically  
 225 taken up. Rather, myristate seems to be essential for biological processes in AM fungi via a  
 226 myristate-specific metabolism. Myristate is used for the lipid modification of proteins, called  
 227 protein *N*-myristoylation, in a variety of eukaryotes (28-30). Protein *N*-myristoylation is  
 228 catalyzed by NMT, which transfers myristate from myristoyl-CoA to the N-terminal glycine  
 229 residue of the target proteins (31). *N*-myristoyl proteins are involved in diverse cellular  
 230 processes such as protein phosphorylation and signal transduction. Disruption of the *NMT* gene  
 231 causes recessive lethality in several fungal species (32-34). In the present study, the *R.*  
 232 *irregularis* *NMT1* gene was upregulated by the application of myristate. Protein *N*-  
 233 myristoylation may be activated in *R. irregularis* by externally supplied myristate, which allows  
 234 it to proliferate.

Under conditions where myristate was supplied in the absence of a host, AM fungi formed DPC-like structures after germination, explored the media by developing runner hyphae in association with BAS formation, and subsequently differentiated secondary spores. We found that *R. irregularis* has the capability to absorb fatty acids through BAS and DPC. Absorbed fatty acids or their metabolites are likely to be stored in lipid bodies or glyoxysomes and translocate in runner hyphae as previously observed in symbiotic extraradical hyphae (27, 35, 36). A part of the fatty acids or lipids is delivered to newly formed spores, which may be used for spore germination and subsequent hyphal elongation.

The observation of incorporating  $^{13}\text{C}$  in triacylglycerols and cell wall components of *R. irregularis* when  $[1-^{13}\text{C}]$ myristate is supplied indicates that myristate is utilized as a carbon source to synthesize cellular components. During symbiosis,  $\beta$ -oxidation, the glyoxylate cycle, and gluconeogenesis are active in AM fungi, and these metabolic pathways have been proposed to play a crucial role in the generation of carbohydrates from lipids (10, 35-37). Based on our observation that major genes involved in  $\beta$ -oxidation, the glyoxylate cycle, gluconeogenesis, and the TCA cycle were induced by the application of myristate, absorbed myristate is likely metabolized via such metabolic pathways and resulting carbohydrates are used to build the fungal cells. Furthermore, ATP elevation through myristate addition indicates that myristate is also used as an electron donor for the respiration of AM fungi. In our culture systems, hexoses

did not give rise to an increase in fungal biomass, although xylose in combination with myristate induced a great number of secondary spores. This finding means that AM fungi are hardly able to use sugars for carbon sources under these conditions. However, hexoses derived from the host are taken up via fungal monosaccharide transporters in intraradical hyphae and/or arbuscules during symbiosis (9). In addition, the monosaccharide transporter *MST2* is expressed even in BAS formed on the medium in a carrot hairy root system (23) and induced in extraradical hyphae applied with xylose (12). Thus, we cannot rule out the possibility that AM fungi can utilize external sugars for their growth under asymbiotic conditions.

In conclusion, we proved that AM fungi are fatty acid auxotrophs, which leads to the possibility of generating a pure culture of biotrophic AM fungi. Although myristate initiates AM fungal growth and sporulation, the size of myristate-induced spores remains small compared with that of symbiotically generated spores. Similar results were obtained with palmitoleic acid-induced spores (7). As smaller spores show low germination rates and infectivity (38), spore maturation in the absence of the host represents an exciting future challenge for the pure culture of AM fungi. Our findings have shed new light on the cellular and molecular biology of AM fungi, and have important implications for the genetic transformation and the development of new strategies for the inoculum production of these organisms.

271

## 272 **Materials and Methods**

273 More details of study methods are provided in *SI Appendix, Extended Methods*.

274

275 **Biological materials.** Sterile spore suspension of the AM fungus *R. irregularis* DAOM197198

276 (or DAOM181602, another voucher number for the same fungus) was purchased from Premier

277 Tech. Contaminated hyphae in the spore suspension were removed by density-gradient

278 centrifugation using gastrografen as described in *SI Appendix, Extended Methods*.

279

280 **Asymbiotic culture.** Approximately 300–400 spores of *R. irregularis* were inoculated on 0.3%

281 Phytagel (Sigma-Aldrich) plates containing modified SC medium (1.7 g l<sup>-1</sup> yeast nitrogen base

282 [MP Biomedicals], 2.0 g l<sup>-1</sup> complete SC mixture [Formedium], 5 mM ammonium sulfate, 1

283 mM glycerol, 5 mg l<sup>-1</sup> thiamine hydrochloride, 5 mg l<sup>-1</sup> nicotinic acid, 5 mg l<sup>-1</sup> pyridoxal

284 phosphate, and appropriate amounts of fatty acids) and then covered with 0.3% Phytagel

285 dissolved in 3 mM magnesium sulfate in a 12-well culture plate. For the liquid culture, Phytagel

286 was removed from the medium. Three types of fatty acids were added to the medium: fatty acid

287 salts, fatty acids in an organic solvent, or fatty acids conjugated with BSA (*SI Appendix,*

288 *Extended Methods*). The plates were incubated at 28 °C in the dark. Hyphal elongation was



observed under a dissecting microscope and light microscopes.

**Immobilized cell culture.** An overview of the immobilized cell culture system is represented in the *SI Appendix* (Fig. S3A). Thirty-five ml of 0.75% Phytigel containing 3 mM magnesium sulfate was poured into a 90 mm Petri dish and solidified. A Phytigel tablet (6 mm high and 17.5 mm wide) with a circular incision (3 mm deep and 11.5 mm wide) was cut out using a sterile double cork borer (inner diameter: 11.5 and 17.5 mm, respectively). The gel within the circular incision on the top side of the gel tablet was removed to 3 mm deep using a spatula or disposable pipette tip connected to an aspirator to prepare a hole for spore inoculation. To flatten the bottom of the hole, a small amount of 0.75% Phytigel was added. Approximately 300–400 spores were placed in the hole and covered with 0.75% Phytigel containing 3 mM magnesium sulfate. The Phytigel tablets containing spores were transferred into a six-well culture plate. Each well was filled with 5 mL of full- or half-strength modified SC liquid medium with or without 0.5 mM potassium myristate and monosaccharides (glucose and xylose). AM fungi were grown at 28 °C in the dark. During the culture, the medium was changed once a month.

# **Measurement of fungal biomass.**

Fungal materials were recovered from gels in wells of a culture plate by melting the gels in

citrate buffer and weighed using a micro analytical balance (*SI Appendix, Extended Methods*).

The number of inoculated spores in the well was counted in advance under a dissecting microscope. The standardized growth increment of *R. irregularis* was calculated by dividing the total fungal dry weight in a well by the number of inoculated spores and subtracting the mean dry weight of an inoculated spore.

**Spore morphology and germination assay.** Myristate-induced spores were produced by an immobilized cell culture system in the presence of 0.5 mM potassium myristate in a half-strength modified SC medium for approximately three months. Myristate-induced and symbiotically generated spores were mounted with polyvinyl alcohol–lactic acid–glycerol (PVLG) or Melzer's reagent for microscopic observation. Spores were incubated with 10  $\mu$ M SYTO 13 green fluorescent nucleic acid stain (Thermo Fisher) for 2 h and observed by epifluorescence microscopy. For spore germination assay, myristate-induced and symbiotically generated spores were placed onto 0.3% Phytigel containing 3 mM magnesium sulfate and incubated at 28 °C for one week. Spore germination was examined under a dissecting microscope.

**Single spore inoculation.** A single myristate-induced spore produced by an immobilized cell

culture system in the presence of 0.5 mM potassium myristate and 5 mM xylose in a half-strength modified SC medium was placed onto carrot hairy root plates using a pipette. The production of daughter spores on extraradical hyphae emerging from hairy roots was observed under a dissecting microscope. AM fungal colonization was confirmed by trypan blue staining.

**Fatty acid uptake.** Fatty acid uptake was evaluated using a fluorescent fatty acid analogue, 4,4-difluoro-5-methyl-4-bora-3a,4a-diaza-s-indacene-3-dodecanoic acid (C<sub>1</sub>-BODIPY 500/510 C<sub>12</sub>, Thermo Fisher Scientific). *R. irregularis* was grown in an immobilized cell culture system with modified SC medium containing 0.5 mM potassium myristate without sugars for 4 or 6 weeks. Fungal hyphae were stained with 0.5 mM C<sub>1</sub>-BODIPY 500/510 C<sub>12</sub> in modified SC medium. After a 10-minute incubation, fungal hyphae protruding outside a Phytigel tablet were observed using a laser scanning confocal microscope. For the samples incubated for 1 or 5 days in the medium containing the fluorescent probe, a Phytigel tablet containing fungal materials was melted by adding citrate buffer. Fluorescent signals were observed under an epifluorescence microscope.

**LC-MS analysis of glucosamine.** [1-<sup>13</sup>C]Myristic acid (Taiyo Nippon Sanso) and non-labeled myristic acid were dissolved in 200 mM potassium hydroxide to 100 mM final concentration

of fatty acids. *R. irregularis* was cultured in a modified SC solid medium supplied with 1 mM neutralized myristate for two months. Approximately 1–2 mg dry fungal materials per sample were recovered from the solid medium as described above. Extraction of glucosamine derived from fungal biomass and LC-MS analysis was described in *SI Appendix, Extended Methods*. The relative intensities of the molecular ion peaks of glucosamine ( $[M+H]^+$ ,  $m/z$  180.19;  $[M+1+H]^+$ ,  $m/z$  181.19; and  $[M+2+H]^+$ ,  $m/z$  182.19) were monitored. The relative fraction of M+0, M+1, and M+2 in the glucosamine standard solution were 92.9%, 7.1%, and 0%, respectively.

**$^{13}\text{C}$ -NMR analysis of triacylglycerols.** *R. irregularis* was cultured in a modified SC solid medium supplied with 1 mM neutralized  $[1-^{13}\text{C}]$ myristate (Cambridge Isotope Laboratories, Inc.) for 2.5 months as described above. Approximately 43 mg of wet fungal materials were recovered from solid medium. Extraction of lipids from fungal biomass, purification of triacylglycerol, and  $^{13}\text{C}$ -NMR analysis were described in *SI Appendix, Extended Methods*.

**Determination of ATP content.** Five hundred spores of *R. irregularis* were incubated in 100  $\mu\text{L}$  of sterilized water at 28 °C for 5 days. Potassium myristate was added to the germinating spores at a final concentration of 0.5 mM. For the control, the protonophore CCCP was

simultaneously added at a final concentration of 50  $\mu$ M. The germinating spores were incubated for 12 h. After centrifugation at 3,500 rpm for 10 min, 400  $\mu$ L of phosphate-buffered saline (PBS; pH 7.4) was added to the pellet. The spore suspension was transferred to a 2 mL tube containing a metal crusher (TAITEC) and placed on ice. The sample was crushed with a bead crusher ( $\mu$ T-12, TAITEC) at 2,200 rpm for 10 s three times. The crushed fungal materials were transferred to a 1.5 mL tube and centrifuged at 8,000 $\times g$  for 2 min at 4  $^{\circ}$ C. The supernatant was recovered and used for determination of ATP and protein concentration. ATP concentration was measured using the CellTiter-Glo Luminescent Cell Viability Assay Kit (Promega) following the manufacturer's instructions. Protein concentration was assayed using the Qubit Protein Assay Kit (Thermo Fisher Scientific). ATP content in the germinating spores was calculated as pmol per mg protein.

**Quantitative RT-PCR.** *R. irregularis* was grown in an immobilized cell culture system with modified SC medium containing 0.5 mM potassium myristate without sugars for 3 weeks. Subsequently, Phytigel tablets containing fungal materials were incubated in a modified SC medium without fatty acids for 11 days to induce fatty acid starvation. During the first three days of starvation, the culture medium was exchanged every day. After the starvation treatment, half of each sample was added to 100 mM potassium myristate to a final concentration of 0.5

mM, and the remaining half of each sample was added the same amount of sterilized water.

After a 3 or 12 h incubation, fungal hyphae protruding outside a Phytigel tablet were recovered

using forceps and immediately immersed in 500  $\mu$ L of RNAiso Plus (Takara Bio). The fungal

hyphae were crushed using the bead crusher  $\mu$ T-12 with a metal crusher at 2,200 rpm for 10 s

three times with cooling on ice. RNA purification, cDNA synthesis, and semiquantitative PCR

was conduct as described in *SI Appendix, Extended Methods*.

**Statistical analysis.** All statistical analyses were performed using R version 3.5.2. To examine

the differences among experimental groups, data were analyzed with Student's t-test or Tukey

HSD test, as appropriate. Differences at  $P < 0.05$  were considered to be significant.

**ACKNOWLEDGMENTS.** We thank T. Hagiwara and R. Okita (Shinshu University) for their

technical assistance, and M. Saito (Tohoku University) for discussions and comments on the

work. This work was supported by ACCEL (JPMJAC1403) form the Japan Science and

Technology Agency (to K.M., K.A, and K.S.) and the Grant-in-Aid for Scientific Research

(15H01751) from the Japan Society for the Promotion of Science (to K.S.).

# References

1. A. Keymer, P. Pimprikar, V. Wewer, C. Huber, M. Brands, S. Bucerius, P.-M. Delaux, V. Klingl, E. von Röepenack-Lahaye, T. L. Wang, W. Eisenreich, P. Döermann, M. Parniske, C. Gutjahr, Lipid transfer from plants to arbuscular mycorrhiza fungi. *eLife* **6**, e29107 (2017).
2. Y. Jiang, W. Wang, Q. Xie, N. Liu, L. Liu, D. Wang, X. Zhang, C. Yang, X. Chen, D. Tang, E. Wang, Plants transfer lipids to sustain colonization by mutualistic mycorrhizal and parasitic fungi. *Science* **356**, 1172-1175 (2017).
3. L. H. Luginbuehl, G. N. Menard, S. Kurup, H. Van Erp, G. V. Radhakrishnan, A. Breakspear, G. E. D. Oldroyd, P. J. Eastmond, Fatty acids in arbuscular mycorrhizal fungi are synthesized by the host plant. *Science* **356**, 1175-1178 (2017).
4. J. W. Spatafora, Y. Chang, G. L. Benny, K. Lazarus, M. E. Smith, M. L. Berbee, G. Bonito, N. Corradi, I. Grigoriev, A. Gryganskyi, T. Y. James, K. O'Donnell, R. W. Roberson, T. N. Taylor, J. Uehling, R. Vilgalys, M. M. White, J. E. Stajich, A phylum-level phylogenetic classification of zygomycete fungi based on genome-scale data. *Mycologia* **108**, 1028-1046 (2016).
5. M. C. Brundrett, L. Tedersoo, Evolutionary history of mycorrhizal symbioses and global host plant diversity. *New Phytol.* **220**, 1108-1115 (2018).

- 414 6. U. Hildebrandt, F. Ouziad, F.-J. Marner, H. Bothe, The bacterium *Paenibacillus validus*  
415 stimulates growth of the arbuscular mycorrhizal fungus *Glomus intraradices* up to the  
416 formation of fertile spores. *FEMS Microbiol. Lett.* **254**, 258-267 (2006).
- 417 7. H. Kameoka, I. Tsutsui, K. Saito, Y. Kikuchi, Y. Handa, T. Ezawa, H. Hayashi, M.  
418 Kawaguchi, K. Akiyama, Stimulation of asymbiotic sporulation in arbuscular  
419 mycorrhizal fungi by fatty acids. *Nature Microbiology*  
420 <http://dx.doi.org/10.1038/s41564-019-0485-7> (24 June 2019).
- 421 8. Y. Shachar-Hill, P. E. Pfeffer, D. Douds, S. F. Osman, L. W. Doner, R. G. Ratcliffe,  
422 Partitioning of intermediary carbon metabolism in vesicular-arbuscular mycorrhizal  
423 leek. *Plant Physiol.* **108**, 7-15 (1995).
- 424 9. M. Z. Solaiman, M. Saito, Use of sugars by intraradical hyphae of arbuscular  
425 mycorrhizal fungi revealed by radiorespirometry. *New Phytol.* **136**, 533-538 (1997).
- 426 10. P. E. Pfeffer, D. D. Douds, Jr., G. Bécard, Y. Shachar-Hill, Carbon uptake and the  
427 metabolism and transport of lipids in an arbuscular mycorrhiza. *Plant Physiol.* **120**, 587-  
428 598 (1999).
- 429 11. A. Schüßler, H. Martin, D. Cohen, M. Fitz, D. Wipf, Characterization of a carbohydrate  
430 transporter from symbiotic glomeromycotan fungi. *Nature* **444**, 933-936 (2006).
- 431 12. N. Helber, K. Wippel, N. Sauer, S. Schaarschmidt, B. Hause, N. Requena, A versatile



- monosaccharide transporter that operates in the arbuscular mycorrhizal fungus *Glomus* sp is crucial for the symbiotic relationship with plants. *Plant Cell* **23**, 3812-3823 (2011).
13. N. Ait Lahmidi, P.-E. Courty, D. Brulé, O. Chatagnier, C. Arnould, J. Doidy, G. Berta, G. Lingua, D. Wipf, L. Bonneau, Sugar exchanges in arbuscular mycorrhiza: RiMST5 and RiMST6, two novel *Rhizophagus irregularis* monosaccharide transporters, are involved in both sugar uptake from the soil and from the plant partner. *Plant Physiol. Biochem.* **107**, 354-363 (2016).
14. A. Bravo, M. Brands, V. Wewer, P. Dörmann, M. J. Harrison, Arbuscular mycorrhiza-specific enzymes FatM and RAM2 fine-tune lipid biosynthesis to promote development of arbuscular mycorrhiza. *New Phytol.* **214**, 1631-1645 (2017).
15. M. Brands, V. Wewer, A. Keymer, C. Gutjahr, P. Dörmann, The *Lotus japonicus* acyl-acyl carrier protein thioesterase FatM is required for mycorrhiza formation and lipid accumulation of *Rhizophagus irregularis*. *Plant J.* **95**, 219-232 (2018).
16. M. Trépanier, G. Bécard, P. Moutogliss, C. Willemot, S. Gagné, T. J. Avis, J.-A. Rioux, Dependence of arbuscular-mycorrhizal fungi on their plant host for palmitic acid synthesis. *Appl. Environ. Microbiol.* **71**, 5341-5347 (2005).
17. V. Wewer, M. Brands, P. Dörmann, Fatty acid synthesis and lipid metabolism in the obligate biotrophic fungus *Rhizophagus irregularis* during mycorrhization of *Lotus*

- 450        *japonicus*. *Plant J.* **79**, 398-412 (2014).
- 451    18.    N. Tang, H. San Clemente, S. Roy, G. Bécard, B. Zhao, C. Roux, A survey of the gene  
452        repertoire of *Gigaspora rosea* unravels conserved features among Glomeromycota for  
453        obligate biotrophy. *Front. Microbiol.* **7**, 233 (2016).
- 454    19.    Y. Kobayashi, T. Maeda, K. Yamaguchi, H. Kameoka, S. Tanaka, T. Ezawa, S.  
455        Shigenobu, M. Kawaguchi, The genome of *Rhizophagus clarus* HR1 reveals a common  
456        genetic basis for auxotrophy among arbuscular mycorrhizal fungi. *BMC Genomics* **19**,  
457        465 (2018).
- 458    20.    X. Sun, W. Chen, S. Ivanov, A. M. MacLean, H. Wight, T. Ramaraj, J. Mudge, M. J.  
459        Harrison, Z. Fei, Genome and evolution of the arbuscular mycorrhizal fungus  
460        *Diversispora epigaea* (formerly *Glomus versiforme*) and its bacterial endosymbionts.  
461        *New Phytol.* **221**, 1556-1573 (2019).
- 462    21.    E. Tisserant, A. Kohler, P. Dozolme-Seddas, R. Balestrini, K. Benabdellah, A. Colard,  
463        D. Croll, C. Da Silva, S. K. Gomez, R. Koul, N. Ferrol, V. Fiorilli, D. Formey, P. Franken,  
464        N. Helber, M. Hijri, L. Lanfranco, E. Lindquist, Y. Liu, M. Malbreil, E. Morin, J. Poulain,  
465        H. Shapiro, D. van Tuinen, A. Waschke, C. Azcón-Aguilar, G. Bécard, P. Bonfante, M.  
466        J. Harrison, H. Küster, P. Lammers, U. Paszkowski, N. Requena, S. A. Rensing, C. Roux,  
467        I. R. Sanders, Y. Shachar-Hill, G. Tuskan, J. P. W. Young, V. Gianinazzi-Pearson, F.

- 468 Martin, The transcriptome of the arbuscular mycorrhizal fungus *Glomus intraradices*  
469 (DAOM 197198) reveals functional tradeoffs in an obligate symbiont. *New Phytol.* **193**,  
470 755-769 (2012).
- 471 22. E. Tisserant, M. Malbreil, A. Kuo, A. Kohler, A. Symeonidi, R. Balestrini, P. Charron,  
472 N. Duensing, N. F. D. Frey, V. Gianinazzi-Pearson, L. B. Gilbert, Y. Handa, J. R. Herr,  
473 M. Hijri, R. Koul, M. Kawaguchi, F. Krajinski, P. J. Lammers, F. G. Masclauxm, C.  
474 Murat, E. Morin, S. Ndikumana, M. Pagni, D. Petitpierre, N. Requena, P. Rosikiewicz,  
475 R. Riley, K. Saito, H. S. Clemente, H. Shapiro, D. Van Tuinen, G. Bécard, P. Bonfante,  
476 U. Paszkowski, Y. Y. Shachar-Hill, G. A. Tuskan, P. W. Young, I. R. Sanders, B.  
477 Henrissat, S. A. Rensing, I. V. Grigoriev, N. Corradi, C. Roux, F. Martin, Genome of an  
478 arbuscular mycorrhizal fungus provides insight into the oldest plant symbiosis. *Proc.*  
479 *Natl. Acad. Sci. USA* **110**, 20117-20122 (2013).
- 480 23. H. Kameoka, T. Maeda, N. Okuma, M. Kawaguchi, Structure-specific regulation of  
481 nutrient transport and metabolism in arbuscular mycorrhizal fungi. *Plant and Cell*  
482 *Physiology* <http://dx.doi.org/10.1093/pcp/pcz122> (26 June 2019).
- 483 24. U. Hildebrandt, K. Janetta, H. Bothe, Towards growth of arbuscular mycorrhizal fungi  
484 independent of a plant host. *Appl. Environ. Microbiol.* **68**, 1919-1924 (2002).
- 485 25. B. Bago, C. Azcón-Aguilar, A. Goulet, Y. Piché, Branched absorbing structures (BAS):

a feature of the extraradical mycelium of symbiotic arbuscular mycorrhizal fungi. *New Phytol.* **139**, 375-388 (1998).

26. B. Bago, W. Zipfel, R. M. Williams, J. Jun, R. Arreola, P. J. Lammers, P. E. Pfeffer, Y. Shachar-Hill, Translocation and utilization of fungal storage lipid in the arbuscular mycorrhizal symbiosis. *Plant Physiol.* **128**, 108-124 (2002).

27. K. Saito, Y. Kuga-Uetake, M. Saito, Acidic vesicles in living hyphae of an arbuscular mycorrhizal fungus, *Gigaspora margarita*. *Plant Soil* **261**, 231-237 (2004).

28. T. A. Farazi, G. Waksman, J. I. Gordon, The biology and enzymology of protein N-myristoylation. *J. Biol. Chem.* **276**, 39501-39504 (2001).

29. J. A. Boutin, Myristoylation. *Cell. Signal.* **9**, 15-35 (1997).

30. J. I. Gordon, R. J. Duronio, D. A. Rudnick, S. P. Adams, G. W. Coke, Protein N-myristoylation. *J. Biol. Chem.* **266**, 8647-8650 (1991).

31. D. R. Johnson, R. S. Bhatnagar, L. J. Knoll, J. I. Gordon, Genetic and biochemical studies of protein N-myristoylation. *Annu. Rev. Biochem.* **63**, 869-914 (1994).

32. J. K. Lodge, E. Jackson-Machelski, D. L. Toffaletti, J. R. Perfect, J. I. Gordon, Targeted gene replacement demonstrates that myristoyl-CoA: protein N-myristoyltransferase is essential for viability of *Cryptococcus neoformans*. *Proc. Natl. Acad. Sci. USA* **91**, 12008-12012 (1994).

33. R. A. Weinberg, C. A. McWherter, S. K. Freeman, D. C. Wood, J. I. Gordon, S. C. Lee, Genetic studies reveal that myristoylCoA:protein N-myristoyltransferase is an essential enzyme in *Candida albicans*. *Mol. Microbiol.* **16**, 241-250 (1995).
34. R. Duronio, D. Towler, R. Heuckeroth, J. Gordon, Disruption of the yeast N-myristoyl transferase gene causes recessive lethality. *Science* **243**, 796-800 (1989).
35. B. Bago, P. E. Pfeffer, J. Abubaker, J. Jun, J. W. Allen, J. Brouillette, D. D. Douds, P. J. Lammers, Y. Shachar-Hill, Carbon export from arbuscular mycorrhizal roots involves the translocation of carbohydrate as well as lipid. *Plant Physiol.* **131**, 1496-1507 (2003).
36. P. J. Lammers, J. Jun, J. Abubaker, R. Arreola, A. Gopalan, B. Bago, C. Hernandez-Sebastia, J. W. Allen, D. D. Douds, P. E. Pfeffer, Y. Shachar-Hill, The glyoxylate cycle in an arbuscular mycorrhizal fungus. Carbon flux and gene expression. *Plant Physiol.* **127**, 1287-1298 (2001).
37. B. Bago, P. E. Pfeffer, D. D. Douds, Jr., J. Brouillette, G. Bécard, Y. Shachar-Hill, Carbon metabolism in spores of the arbuscular mycorrhizal fungus *Glomus intraradices* as revealed by nuclear magnetic resonance spectroscopy. *Plant Physiol.* **121**, 263-272 (1999).
38. J. Marleau, Y. Dalpé, M. St-Arnaud, M. Hijri, Spore development and nuclear inheritance in arbuscular mycorrhizal fungi. *BMC Evol. Biol.* **11**, 51 (2011).

# Figure legends

**Fig. 1.** Asymbiotic culture of *R. irregularis* in the presence of fatty acids. (A) Standardized growth increment (see Materials and Methods) during 8 weeks in the modified SC solid medium supplemented with potassium salts of fatty acids, fatty acids and  $\beta$ -MAGs, or fatty acid-BSA conjugates ( $n = 3-4$ ). (B) Time course of biomass production at different concentrations of potassium myristate ( $n = 5-6$ ). (C) Biomass production in an immobilized cell culture system. Immobilized fungal spores were incubated in half-strength modified SC medium supplemented with combinations of potassium myristate and sugars at 8 weeks after inoculation ( $n = 6$ ). For each boxplot, the boxes show the first, median, and third quartiles; the whiskers extend to  $1.5 \times$  interquartile range, and data points for each treatment are displayed. The same lowercase letter indicates no significant difference (Tukey's test,  $P < 0.05$ ; A-C). Fungal growth in the solid medium without fatty acids (D and E) or with potassium myristate (F-P). (D) Germinating spore. Hyphal elongation (E) without fatty acids and (F) with potassium myristate at 8 weeks after inoculation. (G) DPC-like structures formed around an inoculated spore. (H) Radial growth of fungal mycelium. (I) Elongation of runner hyphae. (J) Branching of runner hyphae and the formation of BAS. (K) Magnified image of BAS. (L) Front line of elongated mycelium. The medium around the fungal hyphae became transparent, indicating that the precipitates of metal soaps were solubilized. (M) Myristate-induced secondary spores generated around the

542 inoculated spores. (*N* and *O*) Myristate-induced spores formed along the runner hyphae. (*P*)  
 543 Magnified image of a myristate-induced spore. Fungal growth in the immobilized cell culture  
 544 system (*Q*) without fatty acids and (*R*) with potassium myristate at 8 weeks after inoculation.  
 545 See *SI Appendix* (Table S2) for sample details. BAS, branched absorbing structure; BH,  
 546 branching hypha; DPC, densely packed coil; MS, myristate-induced spore; P, precipitate of  
 547 metal soaps; PS, parent spore (inoculated spore); PT, Phytigel tablet; RH, runner hypha; and  
 548 SH, subtending hypha. Scale bars: 200  $\mu\text{m}$  (*D–G* and *I–P*) and 1,000  $\mu\text{m}$  (*H*, *Q*, and *R*).

549

550 **Fig. 2.** Spore formation of *R. irregularis* under asymbiotic conditions. (*A*) Number and (*B*)  
 551 diameter of myristate-induced spores generated in the solid medium containing different  
 552 concentrations of potassium myristate. Spore diameter was measured at 8 weeks after  
 553 inoculation. (*C*) Number of myristate-induced spores in an immobilized cell culture containing  
 554 0.5 mM potassium myristate and 5 mM monosaccharides at 8 weeks after inoculation. (*D–G*)  
 555 Inoculation of a single myristate-induced spore to carrot hairy roots. (*D*) Inoculated spore that  
 556 was produced in the immobilized cell culture containing potassium myristate and xylose. (*E*)  
 557 Germination of the inoculated spore. (*F*) Daughter spores (DS) on extraradical mycelia (ERM)  
 558 emerged from the carrot hairy roots. (*G*) Colonization of AM fungi in the carrot hairy roots.  
 559 Arrows indicate an inoculated myristate-induced spore. A, arbuscule; and V, vesicle. See *SI*

*Appendix* (Table S2) for sample details. Scale bars: 500  $\mu\text{m}$ . Bars in *A* are standard errors of means (*A*). For each boxplot, the boxes show the first, median, and third quartiles; the whiskers extend to 1.5 $\times$  interquartile range, and data points for each treatment are displayed. The same lowercase letter indicates no significant difference (Tukey's test,  $P < 0.05$ ,  $n = 3-6$  (*A*) and  $n = 6$  (*C*)).

**Fig. 3.** Utilization of fatty acids by *R. irregularis* under asymbiotic conditions. (*A*) Uptake of the fluorescently labeled fatty acid derivative C<sub>1</sub>-BODIPY 500/510 C<sub>12</sub>. A cluster of BAS (upper panels), magnified BAS (middle panels), and a single hypha of BAS (lower panels). Optical sections captured using a confocal laser scanning microscope were projected. Fluorescence images and superimposed bright field images were shown. BAS, branched absorbing structure; and RH, runner hyphae. Scale bars, 200  $\mu\text{m}$ . (*B*) <sup>13</sup>C-NMR spectra of triacylglycerol isolated from mycelial extracts of *R. irregularis* grown in monoxenic root organ culture (upper) and asymbiotic culture supplemented with 1 mM potassium [1-<sup>13</sup>C<sub>1</sub>]myristate (lower). Inset: Chemical structure of a triacylglycerol. (*C*) Mass isotopomer distribution of glucosamine derived from the fungal cell wall. *R. irregularis* was cultured in the solid medium containing unlabeled or <sup>13</sup>C<sub>1</sub>-labeled myristate ( $n = 5$ ). *P* values are based on a *t*-test with the Bonferroni correction. (*D*) ATP content in *R. irregularis* at 12 h after the application of



578 potassium myristate or DW (control) in the presence or absence of CCCP ( $n = 4$ ).  $P$  values are  
579 based on a  $t$ -test. (E) Gene expression analysis in *R. irregularis* at 3 h after the application of  
580 potassium myristate shown by real-time RT-PCR. Relative expression ( $\log_2$  fold change) was  
581 normalized to water-treated samples (myristate treated:  $n = 5$ ; water-treated:  $n = 6$ ).  $*P < 0.05$ ,  
582  $**P < 0.01$ , and  $***P < 0.001$  ( $t$ -test). See *SI Appendix* (Table S4) for gene details. GC,  
583 glyoxylate cycle; GNG, gluconeogenesis. For each boxplot, the boxes show the first, median,  
584 and third quartiles; the whiskers extend to  $1.5 \times$  interquartile range, and data points for each  
585 treatment are displayed (C and D). Mean  $\pm$  s.d. (E).

Fig. 1

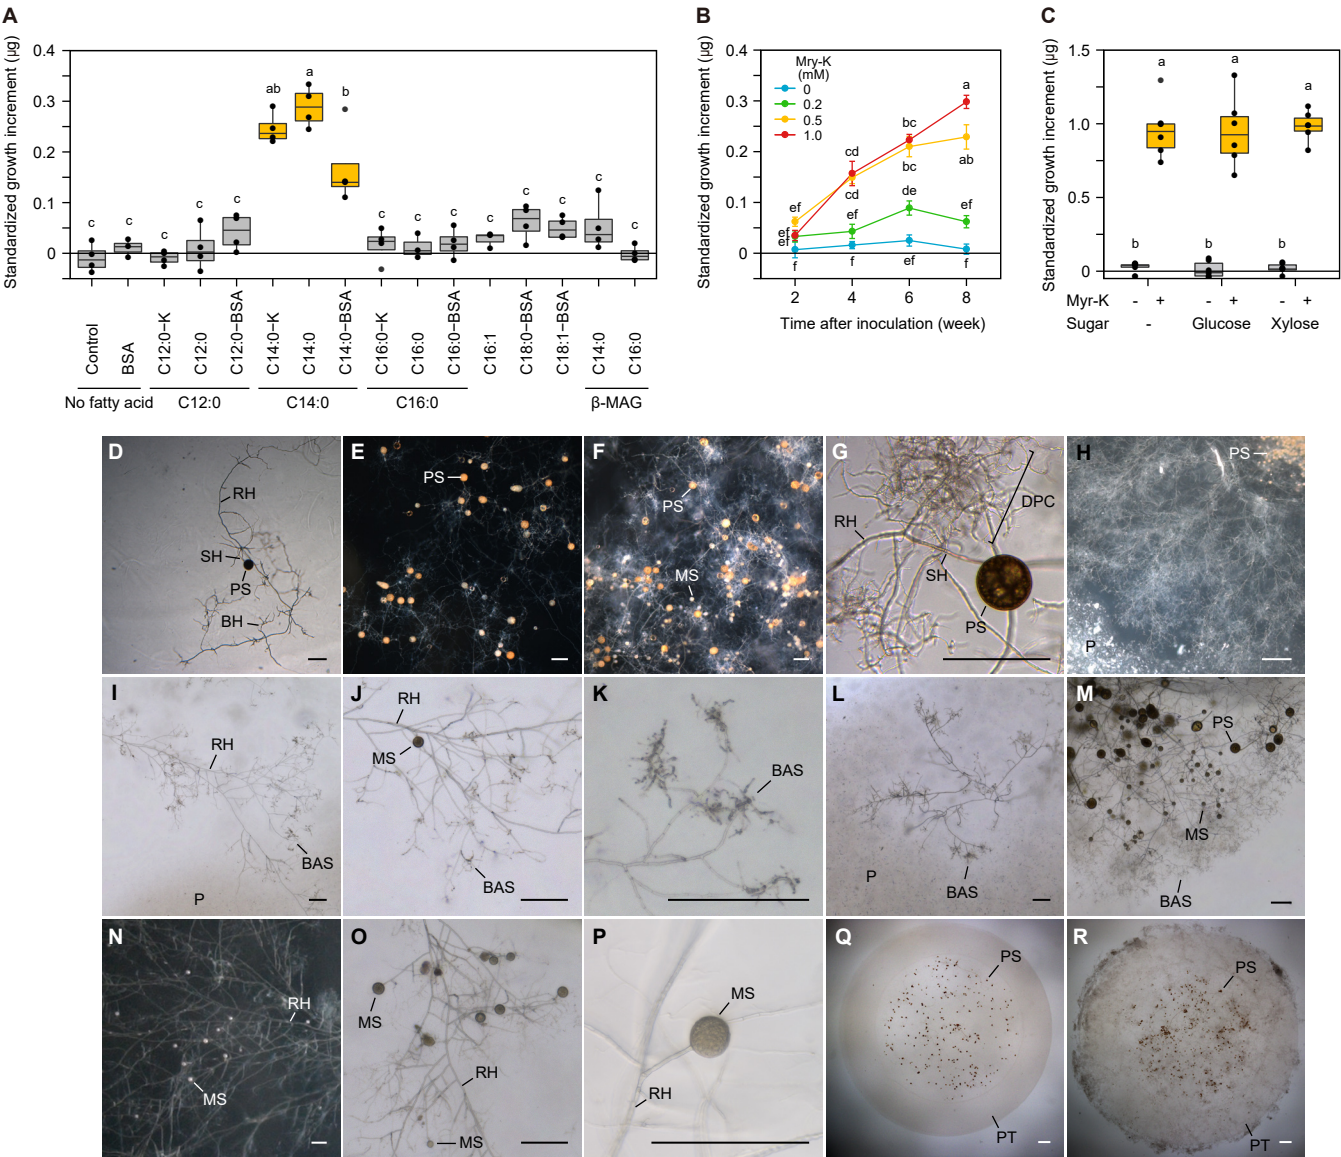

Fig. 2

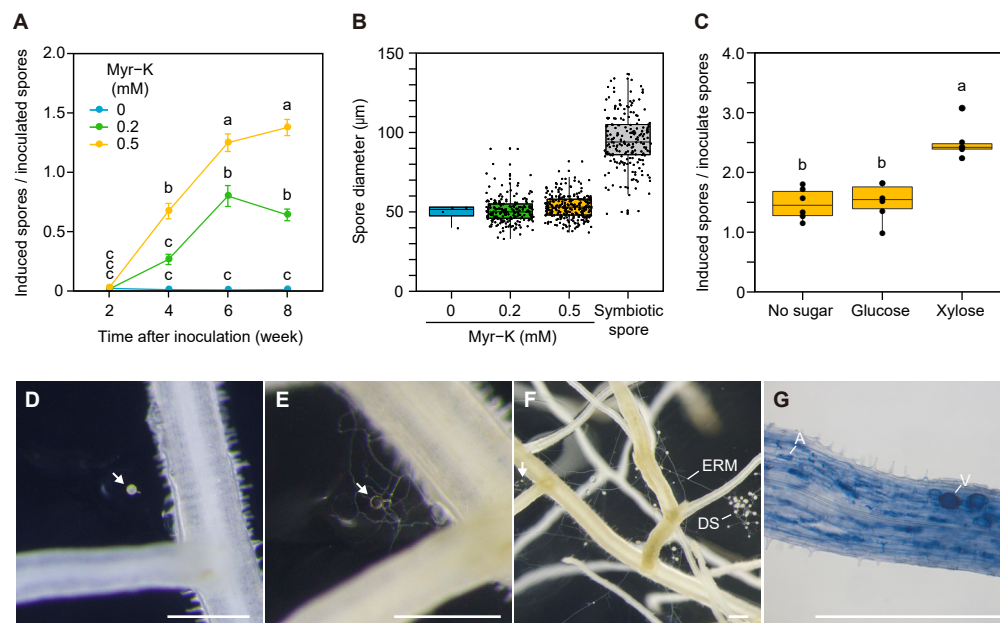

Fig. 3

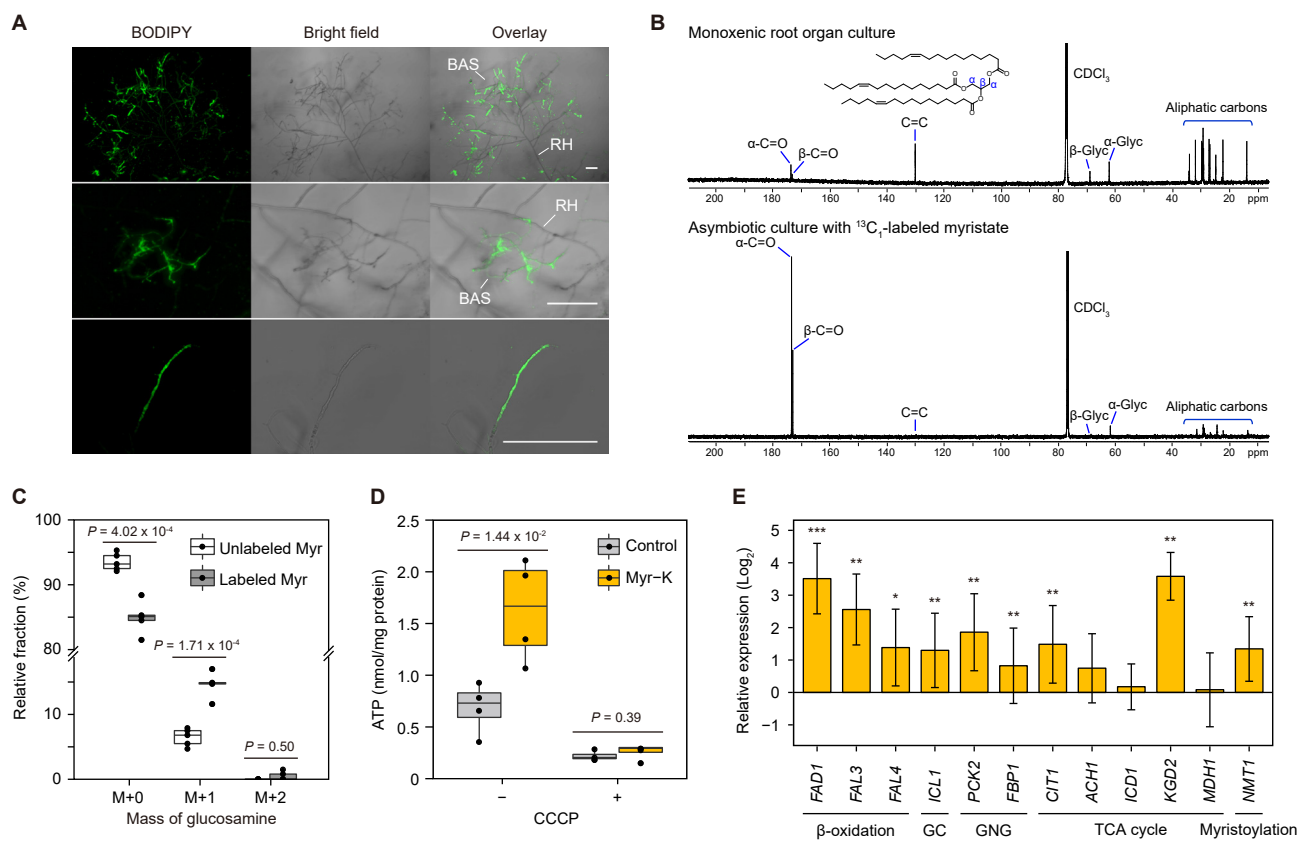

Source: https://www.biorxiv.org/content/10.1101/731489v1.full.pdf
