1 Myristate can be used as a carbon and energy source for the asymbiotic growth of arbuscular  
2 mycorrhizal fungi

3

4 Yuta Sugiura<sup>a,1</sup>, Rei Akiyama<sup>a,1</sup>, Sachiko Tanaka<sup>b</sup>, Koji Yano<sup>b</sup>, Hiromu Kameoka<sup>c</sup>, Shiori  
5 Marui<sup>c</sup>, Masanori Saito<sup>d</sup>, Masayoshi Kawaguchi<sup>b,e</sup>, Kohki Akiyama<sup>c</sup>, and Katsuharu Saito<sup>f,2</sup>

6

7 <sup>a</sup>Graduate School of Science and Technology, Shinshu University, Minamiminowa, Nagano  
8 399-4598, Japan; <sup>b</sup>Division of Symbiotic Systems, National Institute for Basic Biology,

9 Okazaki, Aichi 444-0867, Japan; <sup>c</sup>Graduate School of Life and Environmental Sciences,

10 Osaka Prefecture University, Sakai, Osaka 599-8531, Japan; <sup>d</sup>Field Science Center, Graduate

11 School of Agricultural Science, Tohoku University, Osaki, Miyagi 989-6711, Japan;

12 <sup>e</sup>Department of Basic Biology, School of Life Science, Graduate University for Advanced

13 Studies (SOKENDAI), Okazaki, Aichi 444-0867, Japan; and <sup>f</sup>Faculty of Agriculture, Shinshu

14 University, Minamiminowa, Nagano 399-4598, Japan

15

16 Author contributions: M.K., K.A., and K.S. designed research; Y.S., R.A., S.T., K.Y., S.M.,

17 M.S., K.A., and K.S. performed research; Y.S., R.A., H.K., K.A., and K.S. analyzed data; and

18 K.A. and K.S. wrote the paper.

19

20 The authors declare no competing interest.

21

22 <sup>1</sup>Y.S. and R.A. contributed equally to this work.

23 <sup>2</sup>To whom correspondence may be addressed. Email: [saitok@shinshu-u.ac.jp](mailto:saitok@shinshu-u.ac.jp).

24

25 Keywords: fatty acid auxotrophy | immobilized cell culture | mycorrhizal symbiosis | pure

26 culture

27

28 **Abstract**

29 Arbuscular mycorrhizal (AM) fungi, forming symbiotic associations with land plants, are  
30 obligate symbionts that cannot complete their natural life cycle without a host. Recently, fatty  
31 acid auxotrophy of AM fungi is supported by studies showing that lipids synthesized by the  
32 host plants are transferred to the fungi and that the latter lack genes encoding cytosolic fatty  
33 acid synthases (1-7). Therefore, to establish an asymbiotic cultivation system for AM fungi,  
34 we tried to identify the fatty acids that could promote biomass production. To determine  
35 whether AM fungi can grow on medium supplied with fatty acids or lipids under asymbiotic  
36 conditions, we tested eight saturated or unsaturated fatty acids (C12–C18) and two  
37  $\beta$ -monoacylglycerols. Only myristate (C14:0) led to an increase in biomass of *Rhizophagus*  
38 *irregularis*, inducing extensive hyphal growth and formation of infection-competent  
39 secondary spores. However, such spores were smaller than those generated symbiotically.  
40 Furthermore, we demonstrated that *R. irregularis* can take up fatty acids in its branched  
41 hyphae and use myristate as a carbon and energy source. Myristate also promoted the growth  
42 of *Rhizophagus clarus* and *Gigaspora margarita*. Finally, mixtures of myristate and palmitate  
43 accelerated fungal growth and induced a substantial change in fatty acid composition of  
44 triacylglycerol compared with single myristate application, although palmitate was not used  
45 as a carbon source for cell wall biosynthesis in this culture system. In conclusion, here we

46 demonstrate that myristate boosts asymbiotic growth of AM fungi and can also serve as a  
47 carbon and energy source.

48 **Significance statement**

49 The origins of arbuscular mycorrhizal (AM) fungi, which form symbiotic associations with  
50 land plants, date back over 460 million years ago. During evolution, these fungi acquired an  
51 obligate symbiotic lifestyle, and thus depend on their host for essential nutrients. In particular,  
52 fatty acids are regarded as crucial nutrients for the survival of AM fungi owing to the absence  
53 of genes involved in *de novo* fatty acid biosynthesis in the AM fungal genomes that have  
54 been sequenced so far. Here, we show that myristate initiates AM fungal growth under  
55 asymbiotic conditions. These findings will advance pure culture of AM fungi.

56 **Text**

57

58 Arbuscular mycorrhizal (AM) fungi belonging to the subphylum Glomeromycotina (8) form  
59 symbiotic associations with over 70% of land plant species (9). AM fungi provide hosts with  
60 minerals taken up via hyphal networks in soil and in return receive carbon sources, such as  
61 sugars and lipids derived from plant photosynthates. This is regarded as an obligate symbiotic  
62 relationship, as AM fungi can complete their life cycle only through colonization of their host.  
63 Nevertheless, a few reports of AM fungal culture without hosts have been published. One  
64 report showed that the co-cultivation of the AM fungus *Rhizophagus irregularis* (formerly  
65 *Glomus intraradices*) with bacterial strains of *Paenibacillus validus*, separated from each  
66 other by dialysis membranes, induced secondary spore formation in the AM fungus (10).  
67 Another study reported that some fatty acids, including palmitoleic acid and  
68 (*S*)-12-methyltetradecanoic acid (anteiso-C15:0), induced the formation of  
69 infection-competent secondary spores in asymbiotic cultures of AM fungi (11). These results  
70 suggest that AM fungi may be cultured independently from host plants under artificial  
71 conditions. In nature, the life cycle of AM fungi proceeds as follows. Resting spores of AM  
72 fungi germinate, and then germ tubes emerge from the spores and elongate into the soil. After  
73 colonization into plant roots, AM fungi form highly branched hyphal structures, called  
74 arbuscules, in plant cortical cells, which are the sites of nutrient exchange between AM fungi

75 and their hosts. After receiving carbon sources from their hosts, AM fungi activate the  
76 formation of extraradical hyphal networks in soil and form spores on their hyphae. Altogether,  
77 obtaining carbon sources from their hosts for the production of energy and the carbon  
78 skeleton of fungal cell components is a key step for AM fungal growth and reproduction. In  
79 particular, tracing experiments and nuclear magnetic resonance (NMR) analyses showed that  
80 hexoses are transferred to AM fungi as a carbon source (12-14). Moreover, several AM fungal  
81 monosaccharide transporters have been identified (15-17). Recently, lipids have been proven  
82 to be another plant-derived carbon source (1-3, 18, 19). Since no fatty acid biosynthesis in  
83 extraradical hyphae has ever been detected, lipids were assumed to be synthesized in  
84 intraradical hyphae and transferred to extraradical hyphae and spores (14, 20). However, AM  
85 fungal genomes do not possess genes encoding cytosolic fatty acid synthases involved in *de*  
86 *novo* fatty acid biosynthesis, indicating that AM fungi cannot produce long-chain fatty acids  
87 by themselves (4-7). On the other hand, during AM symbiosis, plants activate fatty acid  
88 biosynthesis and transfer lipids, presumably 16:0  $\beta$ -monoacylglycerol ( $\beta$ -MAG), to AM fungi  
89 via arbuscules (1-3, 18, 19). In fact, in plant mutants defective in fatty acid biosynthetic genes  
90 that are specific to the pathway supplying lipids to their symbionts, AM fungi cannot develop  
91 arbuscules and their root colonization is reduced. These results indicated that AM fungi  
92 require exogenous fatty acids for their growth. Once AM fungi take up fatty acids, they can

93 utilize them through fatty acid desaturases and elongases encoded by genes present in their  
94 genomes and expressed in intraradical hyphae (4, 5, 7, 20-23). Thus, we examined whether  
95 AM fungi can grow and produce fertile spores under asymbiotic conditions through the  
96 application of fatty acids.

97

## 98 **Results**

### 99 **Myristate activates AM fungal growth**

100 Initially, we screened several fatty acids and  $\beta$ -MAGs to identify chemicals that can promote  
101 the growth of *R. irregularis* under asymbiotic conditions. These compounds were added to  
102 modified *Saccharomyces cerevisiae* synthetic complete (SC) medium (*SI Appendix*, Table S1)  
103 with different dissolution methods: fatty acid salts in aqueous solution, fatty acids and  
104  $\beta$ -MAGs dissolved in ethanol, or fatty acids conjugated with bovine serum albumin (BSA).  
105 Fatty acid-BSA conjugates (C12:0, C14:0, C16:0, C18:0, and C18:1) were dissolved to a  
106 final concentration of 0.5 mM, whereas potassium salts of fatty acids (C12:0, C14:0, and  
107 C16:0) were converted into an insoluble form due to the formation of metal soap with  $\text{Ca}^{2+}$   
108 and  $\text{Mg}^{2+}$  in SC medium. Moreover, fatty acids (C12:0, C14:0, C16:0, anteiso-C15:0,  
109 C16:1 $\Delta$ 9Z, and C16:1 $\Delta$ 11Z) and  $\beta$ -MAGs (C14:0 and C16:0) were aggregated in solid  
110 culture (*SI Appendix*, Fig. S1). Symbiotically generated spores of *R. irregularis* were used as



111 starting material (parent spores) for asymbiotic culture. In the absence of fatty acids, no  
112 increase in biomass was detected for *R. irregularis* (Fig. 1A and B). After spore germination,  
113 each *R. irregularis* spore generated a thick and short subtending hypha that soon branched to  
114 produce straight-growing thick hyphae (hereafter referred to as runner hyphae), with several  
115 thin lateral hyphae displaying a low level of ramification (Fig. 1D and E). Hyphal elongation  
116 ceased within one or two weeks after germination. By contrast, myristates (C14:0), unlike  
117 other tested chemicals, substantially increased fungal biomass regardless of the method used  
118 for their incorporation in the medium (Fig. 1A). Moreover, the increase in fungal biomass in  
119 the culture system along time depended on the amount of myristate (Fig. 1B). As a  
120 consequence, the total dry weight of a two-month-old colony treated with 1 mM potassium  
121 myristate was double that of parent spores (*SI Appendix*, Fig. S1A). Surprisingly, 16:0  
122  $\beta$ -MAG and palmitate (16:0), candidate compounds released from arbusculated host cells  
123 during symbiosis (18, 19), did not increase biomass production. However, during cultivation  
124 with myristate, vigorous hyphal development and subsequent differentiation of secondary  
125 spores were observed (Fig. 1F–P and *SI Appendix*, Fig. S1). After germination, *R. irregularis*  
126 differentiated a few densely packed coil (DPC)-like structures from the runner hyphae in the  
127 vicinity of the parent spore (Fig. 1G). The DPC is an extensively branched hyphal structure,  
128 which was first observed in *R. irregularis* co-cultivated with *P. validus* (24) and whose

129 existence was confirmed in fungal materials supplemented with palmitoleic acid and  
130 anteiso-C15:0 (11). Furthermore, *R. irregularis* elongated its runner hyphae by generating  
131 short-branched hyphae similar to branched absorbing structures (BAS) (25) and expanded its  
132 habitat by generating new runner hyphae (Fig. 1H–J). The branched hyphal structures  
133 (hereafter referred to as BAS), small bunches of short and thin branches, were generated from  
134 the runner hyphae at short intervals (Fig. 1K). Interestingly, at the beginning of the cultivation  
135 with a potassium myristate supplement, numerous precipitates of putative myristate salt were  
136 observed throughout the growth medium; however, the precipitates around actively growing  
137 hyphae were progressively solubilized (Fig. 1H, I, and L). Moreover, myristate-induced  
138 secondary spores were frequently observed along the runner hyphae in the vicinity of parent  
139 spores (Fig. 1M). Myristate-induced spores also occurred apically or intercalary along the  
140 lateral branches of the extensively growing runner hyphae (Fig. 1N and O). These spores  
141 were approximately 50  $\mu\text{m}$  in diameter, which is almost half the size of parent spores (Fig. 1F,  
142 M, and P). In the presence of palmitoleic acid (C16:1 $\Delta$ 9Z) in the medium, extensive hyphal  
143 branching and secondary spore formation were observed, which is consistent with the results  
144 by Kameoka and co-workers (11). However, in our system hyphal growth was not associated  
145 with an increase in biomass by the application of palmitoleic acid (Fig. 1A and *SI Appendix*,  
146 Fig. S1E). When lauric acid (C12:0) was applied as a lauric acid–BSA conjugate, *R.*

147 *irregularis* showed active elongation of runner hyphae with few DPC, BAS, or secondary  
148 spores (*SI Appendix*, Fig. S1F). However, this conjugate did not significantly increase fungal  
149 biomass (Fig. 1A). Thus, as the lauric acid–BSA conjugate was effective on hyphal elongation  
150 even at low concentrations (1 and 10  $\mu$ M), lauric acid is not likely to be utilized as a  
151 macronutrient for *R. irregularis* (*SI Appendix*, Fig. S1H).

152         We further developed our culture system to promote fungal growth under asymbiotic  
153 conditions. First, we examined fungal growth in liquid culture with a modified SC medium  
154 containing potassium myristate. Myristate was effective in enhancing fungal biomass also in  
155 liquid culture (*SI Appendix*, Fig. S2A). After germination, precipitates of metal soaps attached  
156 to the hyphal surface (*SI Appendix*, Fig. S2B). Afterwards, as the fungal hyphae continued to  
157 elongate and became tangled, the metal soaps on the surface gradually disappeared. However,  
158 typical BAS were not recognized due to the aggregation of fungal hyphae, although highly  
159 branched fine hyphae were observed in the presence of myristate (*SI Appendix*, Fig. S2C). In  
160 contrast to solid culture, very few secondary spores formed in liquid culture. Next, an  
161 immobilized cell culture system was tested, in which an inoculum of *R. irregularis* spores  
162 embedded in the center of a Phytigel tablet was incubated in modified SC liquid medium (*SI*  
163 *Appendix*, Fig. S3A). This culture system can prevent the aggregation of fungal hyphae and  
164 facilitate the diffusion of medium components in the Phytigel tablets. Notably, AM fungal

165 growth in the immobilized cell culture system with potassium myristate was increased by  
166 3–4-fold with respect to that in solid and liquid cultures (Fig. 1A and C; *SI Appendix*, Fig.  
167 S2A). Hyphal elongation was very active, and some hyphae even spread out of the Phytigel  
168 tablets and continued to grow (Fig. 1Q and R and *SI Appendix*, Fig. S3B–D). The elongation  
169 pattern of hyphae was similar to that in solid culture. For instance, DPC-like structures,  
170 runner hyphae, BAS, and myristate-induced spores were observed (*SI Appendix*, Fig. S3E–I).  
171 Also, myristate-induced spores were still smaller than parent spores (*SI Appendix*, Fig. S3J).

172         As monosaccharides are utilized by AM fungi as carbon sources during symbiosis  
173 (12-14), we examined whether monosaccharides influenced on the growth of *R. irregularis* in  
174 an immobilized cell culture system. However, in the absence of potassium myristate, neither  
175 glucose nor xylose promoted biomass production (Fig. 1C). Similarly, no additional biomass  
176 increase was detected upon treatment with a combination of monosaccharides and potassium  
177 myristate. Modified SC medium contained 1 mM glycerol, which is a potential carbon source  
178 because *R. irregularis* can absorb and metabolize it under asymbiotic conditions (26).  
179 However, glycerol did not increase biomass production of *R. irregularis* with or without  
180 myristate (*SI Appendix*, Fig. S1B–D).

181         To ascertain whether myristate exerts similar effects in other AM fungal species,  
182 *Rhizophagus clarus* (Order: Glomerales, Family: Glomeraceae) and *Gigaspora margarita*

183 (Order: Diversisporales, Family: Gigasporaceae), belonging to the same genus as and a  
184 different order than *R. irregularis*, respectively, were cultured in the same conditions. When  
185 incubated in a medium without fatty acids, *R. clarus* produced short runner hyphae from the  
186 parent spores and formed a few small secondary spores, although hyphal elongation soon  
187 ceased (*SI Appendix*, Fig. S4). Conversely, in the presence of myristate, *R. clarus* showed  
188 active hyphal growth and sporulation accompanied by an increase in biomass. After  
189 germination, runner hyphae were vigorously elongated and sometimes branched  
190 dichotomously. In addition, BAS-like structures were generated at regular intervals from  
191 several long runner hyphae. Myristate-induced secondary spores were also formed on short  
192 lateral branches deriving from runner hyphae. Similar to those seen in *R. irregularis*, the  
193 myristate-induced spores of *R. clarus* were half the size of the parent spores and possessed  
194 thinner spore walls. Since we could not obtain an adequate number of sterile spores of *G.*  
195 *margarita*, we only analyzed its growth pattern. *G. margarita* produced longer hyphae than *R.*  
196 *irregularis* and *R. clarus* even in the absence of myristate, possibly owing to its large spores  
197 with more abundant energy reserves (*SI Appendix*, Fig. S5). After transfer to a  
198 myristate-containing medium, *G. margarita* produced much longer runner hyphae, from  
199 which BAS-like structures were generated. No newly formed spores were observed in *G.*  
200 *margarita*, although auxiliary cells (subglobose, hyaline cells clustered in groups of

201 approximately 10 with spiny ornamentations borne on coiled hyphae) differentiated in both  
202 media.

203

#### 204 **Myristate-induced spores have infection capability**

205 Myristate-induced spores of *R. irregularis* began to differentiate from two weeks after  
206 cultivation in solid medium. The number of myristate-induced spores increased with time and  
207 amount of myristate and finally reached 1.4 spores per parent spore eight weeks after  
208 treatment (Fig. 2A). However, these spores were still half the size of the parent spores (Fig.  
209 2B). In the immobilized cell culture system, the number of *R. irregularis* myristate-induced  
210 spores was equal to that in solid culture, and addition of xylose further promoted their  
211 production, reaching up to 2.5 spores per parent spore (Fig. 2C and *SI Appendix*, Fig. S6).  
212 Myristate-induced spores were initially white to pale yellow and gradually turned to a  
213 yellow-brown color, similar to symbiotically generated spores (*SI Appendix*, Fig. S6A and Fig.  
214 S7A). Moreover, both spores induced by myristate and those produced symbiotically showed  
215 three spore wall layers originating from cylindrical subtending hyphae, although wall layers  
216 of myristate-induced spores were less thick than those of symbiotically generated spores (*SI*  
217 *Appendix*, Fig. S7B). Many nuclei, vacuoles, and lipid droplets were observed in both spore  
218 types (*SI Appendix*, Fig. S7A and B). To test whether myristate-induced spores could colonize

219 plant roots, single spores generated in the immobilized cell culture system with potassium  
220 myristate and xylose were inoculated to carrot hairy roots. In total, 245 spores were examined  
221 in six independent experiments (*SI Appendix*, Table S3). Myristate-induced spores displayed  
222 infectivity towards hairy roots, triggering the production of next-generation mature spores on  
223 the extraradical hyphae that emerged from the roots (Fig. 2D–G). Approximately half of the  
224 germinated spores could colonize hairy roots and produce daughter spores, albeit large  
225 variations in the germination rate and infectivity of spores were observed among the trials  
226 due to the effect of experimental manipulations (*SI Appendix*, Table S3).

227

### 228 **AM fungi utilize myristate as a carbon and energy source**

229 To address the use of fatty acids by AM fungi under asymbiotic conditions, we analyzed fatty  
230 acid uptake using two fluorescent fatty acid derivatives of different chain lengths,  
231 C<sub>1</sub>-BODIPY 500/510 C<sub>12</sub> and BODIPY FL C<sub>16</sub>. *R. irregularis* absorbed C<sub>1</sub>-BODIPY 500/510  
232 C<sub>12</sub> through its BAS (not runner hyphae) within 10 min from first exposure (Fig. 3A). The  
233 probe was first taken up from the hyphal tips of BAS (Fig. 3A), then fluorescent signals were  
234 observed over time in lipid body-like structures (27, 28) within runner hyphae, which were  
235 translocated by cytoplasmic streaming (*SI Appendix*, Fig. S8B and Movie S1). BODIPY FL  
236 C<sub>16</sub> was also absorbed by the BAS within 4 h, while faint probe signals were observed during

237 a short period of 10 min after the exposure (*SI Appendix*, Fig. S9A–C). Long exposure to  
238 these probes resulted in signals localized in myristate-induced spores as well as BAS, runner  
239 hyphae, and DPC, but parent spores were rarely labeled (*SI Appendix*, Fig. S8A–E and Fig.  
240 S9D–H). Moreover, germ tubes deriving from germinating spores incubated in sterilized  
241 water also took up the fluorescently labeled fatty acids, indicating that the activation of AM  
242 fungal hyphae by myristate is not necessarily required for fatty acid uptake (*SI Appendix*, Fig.  
243 S8F–G and S9I–J). Gene expression analysis confirmed that potassium myristate  
244 transcriptionally activated  $\beta$ -oxidation, the glyoxylate cycle, gluconeogenesis, and the TCA  
245 cycle 3 h after its application (Fig. 3B). Interestingly, a gene encoding a *N*-myristoyl  
246 transferase (NMT), which catalyzes the myristoylation of proteins, was upregulated by  
247 myristate. To further assess whether myristate provides the carbon skeleton for fungal cell  
248 components, we applied [1-<sup>13</sup>C]myristate to the culture medium and analyzed the cell wall  
249 components of *R. irregularis*. After the extraction of fungal cell walls, chitin and chitosan  
250 were converted into glucosamine through acid hydrolysis. Liquid chromatography-mass  
251 spectrometry (LC-MS) analysis of the extracted glucosamine demonstrated that the relative  
252 ion intensity of M+1 was significantly higher in AM fungi supplemented with  
253 [1-<sup>13</sup>C]myristate (mean 16.4%) than in those supplemented with non-labeled myristate (6.1%)  
254 (Fig. 3C). This finding indicated that external myristate was taken up by *R. irregularis* and



255 utilized for the biosynthesis of chitin and chitosan in fungal cell walls. In addition, to evaluate  
256 the use of myristate as an energy source, ATP production was measured after the application  
257 of myristate. In particular, we applied myristate to germinating hyphae and measured their  
258 ATP content 12 h after application. Notably, ATP content increased by 2.4-fold in the  
259 presence of myristate (Fig. 3D). In addition, when carbonyl cyanide  
260 *m*-chlorophenylhydrazone (CCCP), an inhibitor of mitochondrial membrane depolarization,  
261 was simultaneously applied to the hyphae, ATP content did not increase even after fatty acid  
262 application. The translocation of the fluorescent fatty acid probes to myristate-induced spores  
263 (*SI Appendix*, Fig. S8 and S9) prompted us to examine whether myristate is utilized to  
264 synthesize the major storage lipid, triacylglycerol (TAG). To this purpose, we cultured *R.*  
265 *irregularis* in medium supplemented with [1-<sup>13</sup>C]myristic acid. After extraction of lipids from  
266 the fungal materials, TAG was purified through preparative thin-layer chromatography (TLC)  
267 and analyzed by <sup>13</sup>C-NMR. In the spectrum, two peaks at 173.1 and 173.4 ppm, which  
268 corresponded to the carboxyl carbons of acyl chains at the  $\alpha$  and  $\beta$  positions, respectively,  
269 were observed at a much higher intensity than in the spectrum of TAG prepared from  
270 non-labeled fungal materials or monoxenically cultured *R. irregularis* (Fig. 3E). This finding  
271 showed that exogenous myristate was incorporated into TAG, especially in its acyl carboxyl  
272 components.

273           Since no signals denoting the presence of unsaturated TAG fatty acids in  
274 myristate-fed AM fungi were detected by  $^{13}\text{C}$ -NMR (Fig. 3E), the fatty acid composition is  
275 likely different from that in symbiotically generated spores. Further, AM fungi are predicted  
276 to obtain C16:0  $\beta$ -MAG or palmitic acid from the host under symbiotic conditions (18, 19).  
277 Then, we analyzed the growth and lipid composition of AM fungi in the presence of a  
278 combination of myristate and C16:0  $\beta$ -MAG or palmitate. We found that palmitate enhanced  
279 hyphal growth and biomass production of *R. irregularis* when combined with 0.5 mM  
280 myristate, but C16:0  $\beta$ -MAG exerted no significant effect (Fig. 4A and *SI Appendix*, Fig. S10).  
281 Secondary spore formation was also stimulated by the combination of myristate and palmitate  
282 (Fig. 4B). In the presence of palmitate or C16:0  $\beta$ -MAG together with myristate, spores  
283 displayed similar morphology but a slightly larger spore size than those induced by myristate  
284 (Fig. 4C; *SI Appendix*, Fig. S7 and Fig. S10). In addition, lipid droplets extracted from spores  
285 incubated in myristate seemed to be in a solid state, whereas those induced by a mixture of  
286 myristate and palmitate were liquid, similar to symbiotically generated spores (*SI Appendix*,  
287 Fig. S7A). This observation may reflect a change in the lipid composition of TAG. To prove  
288 this hypothesis, we analyzed the fatty acid composition (the major acyl group C14:0, C16:0,  
289 and C16:1 $\Delta$ 11) of AM fungal TAG by gas chromatography-mass spectrometry (GC-MS). In  
290 myristate-fed AM fungi, C14:0 was the dominant acyl group, while C16:0 and C16:1 $\Delta$ 11

291 were found in traces (Fig. 4D). Furthermore, [1-<sup>13</sup>C<sub>1</sub>]myristate labeling experiments showed  
292 that exogenous myristate was directly incorporated into TAG as C14:0 acyl groups (Fig. 4E).  
293 A significant fraction of C16:0 and C16:1Δ11 also derived from [1-<sup>13</sup>C<sub>1</sub>]myristate, indicating  
294 that myristate taken up into the fungus is elongated to C16:0 and desaturated into C16:1Δ11.  
295 In contrast, TAG in fungal materials supplemented with both myristate and palmitate  
296 contained high amounts of C16:0 and C16:1Δ11 (Fig. 4D). The majority of these acyl groups  
297 derived from the exogenous [1-<sup>13</sup>C<sub>1</sub>]palmitate (Fig. 4E). C16:1Δ11, a signature fatty acid for  
298 most AM fungi except those of the genera *Gigaspora*, *Archaeospora*, and *Paraglomus* (29), is  
299 likely to be generated from palmitate by the desaturase DES2, also known as OLE1-like, that  
300 is constitutively expressed in AM fungal hyphae (23, 30, 31). We next analyzed fungal cell  
301 wall components after incubation in a mixture of myristate and palmitate. The relative ion  
302 intensity of [<sup>13</sup>C<sub>1</sub>]glucosamine from AM fungi supplemented with [1-<sup>13</sup>C<sub>1</sub>]palmitate and  
303 non-labeled myristate was similar to the ion intensity of a non-labeled fatty acid mixture,  
304 indicating that carbon from exogenous palmitate was not incorporated into chitin and  
305 chitosan of fungal cell walls (Fig. 4F). Conversely, myristate-derived carbon was used for  
306 cell wall biosynthesis when [1-<sup>13</sup>C<sub>1</sub>]myristate and non-labeled palmitate were supplied.

307

308 **Discussion**

309 AM fungi have an obligate biotrophic lifestyle, i.e., these fungi depend on host-derived  
310 nutrients for their growth. Recently, AM fungi have been shown to receive lipids from the  
311 host via arbuscules (1-3, 18, 19); however, how these fungi utilize these lipids as nutrients is  
312 largely unknown. Here we show that myristate (C14:0) can be used as a carbon and energy  
313 source for the hyphal growth of *R. irregularis* under asymbiotic conditions, thereby providing  
314 the first evidence of increasing AM fungal biomass in a pure culture system. Myristate also  
315 promoted the growth of *R. clarus* and *G. margarita*, suggesting that myristate is effective in  
316 promoting asymbiotic growth in a wider range of AM fungal species. *R. irregularis* and *R.*  
317 *clarus* elongated their hyphae and formed secondary spores in a similar manner. In contrast,  
318 no secondary spores were observed in *G. margarita*, although long runner hyphae with BAS  
319 were generated in the presence of myristate. Considerable variation in the fatty acid  
320 composition of spores was observed between the genera *Rhizophagus* and *Gigaspora* (20,  
321 29); therefore, their utilization of and response to exogenous fatty acids might also differ.  
322 Notably, we confirmed that myristate-induced spores of *R. irregularis* are infective  
323 propagules capable of generating symbiotic daughter spores, as previously demonstrated for  
324 palmitoleic acid-induced secondary spores (11). Moreover, the observation that fluorescently  
325 labeled fatty acid derivatives of different chain length accumulated in *R. irregularis* hyphae

326 suggested that AM fungi are likely to absorb fatty acids non-specifically. However, myristate  
327 was the only fatty acid effective in promoting biomass production under our culture  
328 conditions. This is a surprising finding because 16:0  $\beta$ -MAG or its related chemicals are  
329 thought to be transferred from the host to AM fungi under symbiotic conditions (18, 19).  
330 Meanwhile, as the plant enzymes FatM and RAM2, responsible for AM-specific lipid  
331 biosynthesis, have been found to use C14:0-containing molecular species as well as C16:0 as  
332 a substrate *in vitro* (3, 19), and myristate and C14:0  $\alpha$ -MAG have been detected in  
333 mycorrhizal roots and fungal spores, albeit in very small amounts (18, 20, 29), it is plausible  
334 that myristate is provided to AM fungi by the host. Myristate may be essential for the  
335 biological processes of AM fungi via myristate-specific metabolic pathways. Indeed,  
336 myristate is used for the lipid modification of proteins, called protein *N*-myristoylation, in a  
337 variety of eukaryotes (32-34). Protein *N*-myristoylation is catalyzed by NMT, which transfers  
338 myristate from myristoyl-CoA to the N-terminal glycine residue of target proteins (35).  
339 *N*-myristoylated proteins are involved in diverse cellular processes such as protein  
340 phosphorylation and signal transduction. Interestingly, disruption of the *NMT* gene causes  
341 recessive lethality in several fungal species (36-38). As indicated by the upregulation of the *R.*  
342 *irregularis* *NMT1* gene upon application of myristate, myristate may participate in boosting  
343 AM fungal growth by inducing protein *N*-myristoylation as well as by acting as a carbon

344 source. If this was the case, we predict that fatty acids other than myristate would be also  
345 used for fungal growth if enough myristate was provided to AM fungi to induce  
346 *N*-myristoylation. Consistently, a mixture of myristate and palmitate further promoted fungal  
347 growth and led to a marked increase in the proportion of C16:0 and C16:1 $\Delta$ 11 acyl groups in  
348 fungal TAG, which are the predominant ones in symbiotically grown *R. irregularis* (4, 39).  
349 However, carbon derived from exogenous palmitate was not used for cell wall biosynthesis.  
350 On the other hand, in the presence of myristate, palmitate might stimulate the metabolism of  
351 stored lipids in parent spores for asymbiotic growth or serve as an energy source. The former  
352 hypothesis is consistent with the results of our [1-<sup>13</sup>C<sub>1</sub>]palmitate labeling experiment, in  
353 which exogenous [1-<sup>13</sup>C<sub>1</sub>]palmitate and non-labeled palmitate, likely derived from stored  
354 lipids, were incorporated into lipids of newly produced hyphae and secondary spores.  
355 However, palmitate might become available as a carbon source for AM fungal growth under  
356 both symbiotic and asymbiotic conditions in the presence of factors that were not considered  
357 in our culture system. Future studies may better elucidate how AM fungi use different types  
358 of fatty acids.

359 Fungal cell proliferation requires a sufficient supply of nutrients. Particularly, carbon  
360 sources are critical for producing the building blocks of cells and generating ATP. The  
361 observed incorporation of <sup>13</sup>C in TAG and cell wall components of *R. irregularis* when

362 [1-<sup>13</sup>C]myristate was supplied indicated that myristate is utilized as a carbon source to  
363 synthesize cellular components. During symbiosis,  $\beta$ -oxidation, the glyoxylate cycle, and  
364 gluconeogenesis are active in AM fungi, and these metabolic pathways have been proposed to  
365 play a crucial role in the generation of carbohydrates from lipids (14, 26, 40, 41). Since the  
366 expression of major genes involved in  $\beta$ -oxidation, the glyoxylate cycle, gluconeogenesis,  
367 and the TCA cycle was induced by the application of myristate, absorbed myristate is likely  
368 metabolized through these metabolic pathways and the resulting carbohydrates are used to  
369 build the backbone of fungal cells. Furthermore, increased ATP levels upon myristate addition  
370 indicated that myristate can also be used as an electron donor for the respiration of AM fungi.  
371 In our culture systems, hexoses did not induce an increase in fungal biomass, although xylose  
372 in combination with myristate triggered the production of a great number of secondary spores.  
373 This finding implies that AM fungi can hardly use sugars as carbon sources under these  
374 conditions. This observation is consistent with the results of previous <sup>13</sup>C labeling  
375 experiments, which demonstrated a reduced hexose uptake by germinating spores than by  
376 intraradical hyphae (40). However, hexoses derived from the host are taken up via fungal  
377 monosaccharide transporters in intraradical hyphae and/or arbuscules during symbiosis (13).  
378 In addition, the monosaccharide transporter *MST2* gene is expressed even in BAS formed on  
379 the medium in a carrot hairy root system (23) and induced in extraradical hyphae treated with

380 xylose (16). Thus, we cannot rule out the possibility that AM fungi can utilize exogenous  
381 sugars for their growth under asymbiotic conditions.

382           A characteristic response of AM fungi to myristate is the branching of runner hyphae  
383 and the formation of BAS. To date, a number of chemical compounds, such as strigolactones,  
384 2-hydroxy fatty acids, palmitoleic acid, and branched fatty acids, have been found to induce  
385 hyphal branching during the presymbiotic phase (11, 42, 43). For example, strigolactones  
386 stimulate 5–6<sup>th</sup>-order hyphal branching in *G. margarita* at extremely low concentrations (42),  
387 but they only moderately induce hyphal branching in *Rhizophagus* sp. LPA8 (44). Moreover,  
388 two 2-hydroxy fatty acids, 2OH-C14:0 and 2OH-C12:0, also affected presymbiotic hyphal  
389 growth in *Gigaspora* spp., and these AM fungi were found to produce multiple lateral  
390 branches along the primary germ tubes; however, 2OH-C14:0 and 2OH-C12:0 did not elicit  
391 any morphological change in *R. irregularis* (43). In contrast, palmitoleic acid and branched  
392 fatty acids stimulate hyphal branching of *R. irregularis* and *R. clarus* at low concentrations,  
393 but they do not display this effect in *G. margarita* (11). In particular, palmitoleic acid was  
394 found to induce high-degree short branching and sporulation. However, the effect of  
395 myristate on hyphal branching and elongation was completely different from the effects of  
396 these known stimulants. Indeed, we observed that myristate induced extensive hyphal  
397 branching in *R. irregularis*, *R. clarus*, and *G. margarita* at high concentrations. In contrast, it



398 is known that these AM fungi do not respond to low concentrations of myristate (11, 43). To  
399 explain this phenomenon, it is likely that myristate is utilized as a nutrient, with subsequent  
400 activation of fungal metabolism and gene expression, which results in the differentiation of  
401 BAS, DPC, and branched runner hyphae to further absorb myristate. Indeed, we observed that  
402 fatty acids were taken up by the fungal BAS and DPC. Then, absorbed fatty acids or their  
403 metabolites are likely to be stored in lipid bodies and translocated to runner hyphae, as  
404 previously observed in symbiotic extraradical hyphae (26, 28, 41). Part of the fatty acids or  
405 lipids might be also delivered to newly formed spores, where they may be used for spore  
406 germination and subsequent hyphal elongation.

407 In conclusion, asymbiotic growth of AM fungi can be supported by externally  
408 supplied fatty acids, leading to the possibility of generating a pure culture of biotrophic AM  
409 fungi. Although myristate initiates AM fungal growth and sporulation, the size of  
410 myristate-induced spores remains small compared with that of symbiotically generated spores.  
411 Similar results were obtained for palmitoleic acid-induced spores (11). As smaller spores  
412 show low germination rates and infectivity (45), spore maturation in the absence of the host  
413 represents an exciting future challenge for the pure culture of AM fungi. Altogether, our  
414 findings have shed new light on the cellular and molecular biology of AM fungi and carry  
415 important implications for the development of new strategies for the genetic transformation

416 and the production of inocula of these organisms.

417

## 418 **Materials and Methods**

419 Materials and methods used in this study are described in detail in *SI Appendix, Extended*

420 *Methods*.

421

422 **Biological materials.** Sterile spore suspensions of the AM fungus *R. irregularis*

423 DAOM197198 (or DAOM181602, another voucher number for the same fungus) were

424 purchased from Premier Tech. Hyphae included in the spore suspension were removed by

425 density-gradient centrifugation using gastrografin as described in *SI Appendix, Extended*

426 *Methods*. *R. clarus* HR1 (MAFF520076) and *G. margarita* K-1 (MAFF520052) were also

427 used for asymbiotic culture.

428

429 **Asymbiotic culture.** Approximately 300–400 parent spores of *R. irregularis* were placed on

430 0.3% Phytigel (Sigma-Aldrich) plates containing modified SC medium (*SI Appendix, Table*

431 S1) and then covered with 0.3% Phytigel dissolved in 3 mM magnesium sulfate in a 12-well

432 culture plate. For liquid culture, Phytigel was removed from the medium. Three types of fatty

433 acids were added to the medium: fatty acid salts, fatty acids in an organic solvent, or fatty

434 acids conjugated with BSA. The plates were incubated at 28 °C in the dark. Hyphal  
435 elongation was observed under a dissecting microscope and light microscopes.

436

437 **Immobilized cell culture.** An overview of the immobilized cell culture system is represented  
438 in the *SI Appendix*, Fig. S3A. Six-mm high and 17.5-mm wide Phytigel tablets, with 3-mm  
439 deep and 11.5-mm wide circular incisions containing *R. irregularis* spores, were transferred  
440 into a 6-well culture plate. Each well was filled with 5 mL of full- or half-strength modified  
441 SC liquid medium with an appropriate amount of fatty acids and monosaccharides. AM fungi  
442 were grown at 28 °C in the dark. During the culture period, the liquid medium was changed  
443 once a month.

444

445 **Asymbiotic culture of *R. clarus* and *G. margarita*.** Sterile spores of *R. clarus* were prepared  
446 using a monoxenic system with carrot hairy roots. *G. margarita* spores were extracted from  
447 soil in pot culture and sterilized using chloramine T. These AM fungi were cultured in  
448 Phytigel covered with half-strength modified SC medium containing 0.5 mM potassium  
449 myristate at 28 °C for 12 weeks.

450

451 **Measurement of fungal biomass.**

452 Fungal materials were recovered from gels in wells of a culture plate by melting the gels in  
453 citrate buffer and weighed with a micro analytical balance. The number of parent spores in  
454 each well was counted in advance under a dissecting microscope. The standardized growth  
455 increment of AM fungi was calculated by dividing the total fungal dry weight in each well by  
456 the number of parent spores and subtracting the mean dry weight of a parent spore.

457

458 **Spore morphology.** Spores were mounted with polyvinyl alcohol–lactic acid–glycerol  
459 (PVLG) or Melzer’s reagent for microscopic observation. Spores were incubated with 10  $\mu$ M  
460 SYTO 13 Green Fluorescent Nucleic Acid Stain (Thermo Fisher Scientific) for 2 h and  
461 observed by epifluorescence microscopy. Transmission electron microscopy was performed  
462 to analyze the ultrastructure of spores according to Kameoka and co-workers (11).

463

464 **Single spore inoculation.** A single myristate-induced spore produced in the immobilized cell  
465 culture system in a half-strength modified SC medium supplemented with 0.5 mM potassium  
466 myristate and 5 mM xylose was placed onto plates with carrot hairy roots using a pipette. The  
467 production of daughter spores on extraradical hyphae emerging from hairy roots was observed  
468 under a dissecting microscope. AM fungal colonization was confirmed by trypan blue staining.

469

470 **Fatty acid uptake.** *R. irregularis* was grown in an immobilized cell culture system with  
471 modified SC medium containing 0.5 mM potassium myristate for six to eight weeks. Fungal  
472 hyphae were stained with 0.5 mM  
473 4,4-difluoro-5-methyl-4-bora-3a,4a-diaza-*s*-indacene-3-dodecanoic acid (C<sub>12</sub>-BODIPY  
474 500/510 C<sub>12</sub>, Thermo Fisher Scientific) or  
475 4,4-difluoro-5,7-dimethyl-4-bora-3a,4a-diaza-*s*-indacene-3-hexadecanoic acid (BODIPY FL  
476 C<sub>16</sub>, Thermo Fisher Scientific) in a modified SC medium. After a 10-minute or 4-h incubation,  
477 fungal hyphae protruding outside a Phytigel tablet were observed using a laser scanning  
478 confocal microscope or an epifluorescence microscope. For the samples incubated for over  
479 one day in the medium containing the fluorescent probes, a Phytigel tablet containing fungal  
480 materials was melted by adding citrate buffer. Fluorescent signals were observed under an  
481 epifluorescence microscope. We also assayed fatty acid uptake by germ tubes grown in the

482 absence of myristate.

483

484 **LC-MS analysis of glucosamine.** *R. irregularis* was incubated for eight weeks in

485 half-strength modified SC medium with one of the following five supplements: 1) 0.5 mM

486 non-labeled myristic acid, 2) 0.5 mM [1-<sup>13</sup>C<sub>1</sub>]myristic acid (Taiyo Nippon Sanso), 3) 0.5 mM

487 myristic acid and 0.5 mM palmitic acid, 4) 0.5 mM myristic acid and 0.5 mM

488 [1-<sup>13</sup>C<sub>1</sub>]palmitic acid (Taiyo Nippon Sanso), and 5) 0.5 mM [1-<sup>13</sup>C<sub>1</sub>]myristic acid and 0.5 mM

489 palmitic acid. All fatty acids used were neutralized in 200 mM potassium hydroxide.

490 Extraction of glucosamine from fungal biomass and LC-MS analysis are described in *SI*

491 *Appendix, Extended Methods*. The relative intensities of the molecular ion peaks of

492 glucosamine ([M+H]<sup>+</sup>, *m/z* 180.19; and [M+1+H]<sup>+</sup>, *m/z* 181.19) were monitored. The relative

493 fraction of M+1 with respect to that of M+0 in the glucosamine standard solution was 6.8%.

494

495 **<sup>13</sup>C-NMR analysis of TAG.** *R. irregularis* was cultured in modified SC solid medium

496 supplied with 1 mM neutralized [1-<sup>13</sup>C]myristic acid (Cambridge Isotope Laboratories, Inc.)

497 for 2.5 months. Extraction of lipids from fungal biomass, purification of TAG, and <sup>13</sup>C-NMR

498 analysis are described in *SI Appendix, Extended Methods*.

499

500 **GC-MS analysis of TAG.** *R. irregularis* was incubated for eight weeks in half-strength  
501 modified SC medium with one of the following four supplements: 1) 0.5 mM neutralized  
502 myristic acid, 2) 0.5 mM neutralized [1-<sup>13</sup>C<sub>1</sub>]myristic acid, 3) 0.1 mM potassium myristate  
503 and 0.5 mM neutralized palmitic acid, and 4) 0.1 mM potassium myristate and 0.5 mM  
504 neutralized [1-<sup>13</sup>C<sub>1</sub>]palmitic acid. The extraction of lipids from fungal biomass, purification  
505 of TAG, and GC-MS analysis are described in *SI Appendix, Extended Methods*.

506

507 **Determination of ATP content.** *R. irregularis* spores were incubated in sterilized water at  
508 28 °C for five days. Potassium myristate was added to the germinating spores at a final  
509 concentration of 0.5 mM. For the control, the protonophore CCCP was simultaneously added  
510 at a final concentration of 50 μM. After incubation for 12 h, fungal materials were crushed in  
511 phosphate-buffered saline (PBS; pH 7.4) using a bead crusher (μT-12, TAITEC). ATP  
512 concentration was measured using the CellTiter-Glo Luminescent Cell Viability Assay kit  
513 (Promega). Protein concentration was assayed using the Qubit Protein Assay Kit (Thermo  
514 Fisher Scientific). ATP content in the germinating spores was calculated in nmol mg<sup>-1</sup> of  
515 protein.

516

517 **Quantitative RT-PCR.** *R. irregularis* was grown in an immobilized cell culture system with

518 modified SC medium containing 0.5 mM potassium myristate for three weeks. Subsequently,  
519 AM fungi were incubated in the absence of fatty acids for 11 days to induce fatty acid  
520 starvation. After starvation, potassium myristate to a final concentration of 0.5 mM or  
521 sterilized water was added to the samples. After a 3-h incubation, fungal hyphae protruding  
522 outside a Phytigel tablet were recovered using forceps. RNA extraction, purification, cDNA  
523 synthesis, and semiquantitative PCR were conducted as described in *SI Appendix, Extended*  
524 *Methods*.

525

526 **Statistical analysis.** All statistical analyses were performed using R version 3.5.2. Levene's  
527 tests were applied to check for heteroscedasticity between treatment groups. Data were  
528 transformed as  $\log_{10}(x + 0.5)$  where necessary. To examine the differences among  
529 experimental groups, data were analyzed with Student's *t*-test, Tukey's HSD test,  
530 Wilcoxon–Mann–Whitney test, and Steel–Dwass test, as appropriate. Differences at  $P < 0.05$   
531 were considered significant.

532

533 **Data Availability.** All data used in the study are included in the paper and *SI Appendix*. All  
534 protocols are described in Materials and Methods and *SI Appendix, Extended Methods* or in  
535 cited references. If additional information is needed, it will be available upon request from



536 the corresponding author.

537

538

539 **ACKNOWLEDGMENTS.** We would like to thank T. Hagiwara, R. Oguchi, and R. Okita  
540 (Shinshu University) for their technical assistance and Enago and Editage for the English  
541 language review. LC-MS analysis and laser scanning confocal microscopy were conducted at  
542 the Research Center for Supports to Advanced Science, Shinshu University. This work was  
543 supported by ACCEL (JPMJAC1403) from the Japan Science and Technology Agency (to  
544 M.S., K.M., K.A, and K.S.) and the Grant-in-Aid for Scientific Research (15H01751 and  
545 19H02861) from the Japan Society for the Promotion of Science (to K.S.).

546

## 547 **References**

548

- 549 1. A. Keymer *et al.*, Lipid transfer from plants to arbuscular mycorrhiza fungi. *eLife* **6**,  
550 e29107 (2017).
- 551 2. Y. Jiang *et al.*, Plants transfer lipids to sustain colonization by mutualistic mycorrhizal  
552 and parasitic fungi. *Science* **356**, 1172–1175 (2017).
- 553 3. L. H. Luginbuehl *et al.*, Fatty acids in arbuscular mycorrhizal fungi are synthesized by

- 554 the host plant. *Science* **356**, 1175–1178 (2017).
- 555 4. V. Wewer, M. Brands, P. Dörmann, Fatty acid synthesis and lipid metabolism in the  
556 obligate biotrophic fungus *Rhizophagus irregularis* during mycorrhization of *Lotus*  
557 *japonicus*. *Plant J.* **79**, 398–412 (2014).
- 558 5. N. Tang *et al.*, A survey of the gene repertoire of *Gigaspora rosea* unravels conserved  
559 features among Glomeromycota for obligate biotrophy. *Front. Microbiol.* **7**, 233  
560 (2016).
- 561 6. Y. Kobayashi *et al.*, The genome of *Rhizophagus clarus* HR1 reveals a common  
562 genetic basis for auxotrophy among arbuscular mycorrhizal fungi. *BMC Genomics* **19**,  
563 465 (2018).
- 564 7. X. Sun *et al.*, Genome and evolution of the arbuscular mycorrhizal fungus  
565 *Diversispora epigaea* (formerly *Glomus versiforme*) and its bacterial endosymbionts.  
566 *New Phytol.* **221**, 1556–1573 (2019).
- 567 8. J. W. Spatafora *et al.*, A phylum-level phylogenetic classification of zygomycete fungi  
568 based on genome-scale data. *Mycologia* **108**, 1028–1046 (2016).
- 569 9. M. C. Brundrett, L. Tedersoo, Evolutionary history of mycorrhizal symbioses and  
570 global host plant diversity. *New Phytol.* **220**, 1108–1115 (2018).
- 571 10. U. Hildebrandt, F. Ouziad, F.-J. Marner, H. Bothe, The bacterium *Paenibacillus*

- 572 *validus* stimulates growth of the arbuscular mycorrhizal fungus *Glomus intraradices*  
573 up to the formation of fertile spores. *FEMS Microbiol. Lett.* **254**, 258–267 (2006).
- 574 11. H. Kameoka *et al.*, Stimulation of asymbiotic sporulation in arbuscular mycorrhizal  
575 fungi by fatty acids. *Nat. Microbiol.* **4**, 1654–1660 (2019).
- 576 12. Y. Shachar-Hill *et al.*, Partitioning of intermediary carbon metabolism in  
577 vesicular-arbuscular mycorrhizal leek. *Plant Physiol.* **108**, 7–15 (1995).
- 578 13. M. Z. Solaiman, M. Saito, Use of sugars by intraradical hyphae of arbuscular  
579 mycorrhizal fungi revealed by radiorespirometry. *New Phytol.* **136**, 533–538 (1997).
- 580 14. P. E. Pfeffer, D. D. Douds, Jr., G. Bécard, Y. Shachar-Hill, Carbon uptake and the  
581 metabolism and transport of lipids in an arbuscular mycorrhiza. *Plant Physiol.* **120**,  
582 587–598 (1999).
- 583 15. A. Schüßler, H. Martin, D. Cohen, M. Fitz, D. Wipf, Characterization of a  
584 carbohydrate transporter from symbiotic glomeromycotan fungi. *Nature* **444**, 933–936  
585 (2006).
- 586 16. N. Helber *et al.*, A versatile monosaccharide transporter that operates in the arbuscular  
587 mycorrhizal fungus *Glomus* sp is crucial for the symbiotic relationship with plants.  
588 *Plant Cell* **23**, 3812–3823 (2011).
- 589 17. N. Ait Lahmidi *et al.*, Sugar exchanges in arbuscular mycorrhiza: RiMST5 and

- 590 RiMST6, two novel *Rhizophagus irregularis* monosaccharide transporters, are  
591 involved in both sugar uptake from the soil and from the plant partner. *Plant Physiol.*  
592 *Biochem.* **107**, 354–363 (2016).
- 593 18. A. Bravo, M. Brands, V. Wewer, P. Dörmann, M. J. Harrison, Arbuscular  
594 mycorrhiza-specific enzymes FatM and RAM2 fine-tune lipid biosynthesis to  
595 promote development of arbuscular mycorrhiza. *New Phytol.* **214**, 1631–1645 (2017).
- 596 19. M. Brands, V. Wewer, A. Keymer, C. Gutjahr, P. Dörmann, The *Lotus japonicus*  
597 acyl-acyl carrier protein thioesterase FatM is required for mycorrhiza formation and  
598 lipid accumulation of *Rhizophagus irregularis*. *Plant J.* **95**, 219–232 (2018).
- 599 20. M. Trépanier *et al.*, Dependence of arbuscular-mycorrhizal fungi on their plant host  
600 for palmitic acid synthesis. *Appl. Environ. Microbiol.* **71**, 5341–5347 (2005).
- 601 21. E. Tisserant *et al.*, The transcriptome of the arbuscular mycorrhizal fungus *Glomus*  
602 *intraradices* (DAOM 197198) reveals functional tradeoffs in an obligate symbiont.  
603 *New Phytol.* **193**, 755–769 (2012).
- 604 22. E. Tisserant *et al.*, Genome of an arbuscular mycorrhizal fungus provides insight into  
605 the oldest plant symbiosis. *Proc. Natl. Acad. Sci. USA* **110**, 20117–20122 (2013).
- 606 23. H. Kameoka, T. Maeda, N. Okuma, M. Kawaguchi, Structure-specific regulation of  
607 nutrient transport and metabolism in arbuscular mycorrhizal fungi. *Plant Cell Physiol.*

- 608           **60**, 2272–2281 (2019).
- 609   24.   U. Hildebrandt, K. Janetta, H. Bothe, Towards growth of arbuscular mycorrhizal fungi  
610           independent of a plant host. *Appl. Environ. Microbiol.* **68**, 1919–1924 (2002).
- 611   25.   B. Bago, C. Azcón-Aguilar, A. Goulet, Y. Piché, Branched absorbing structures  
612           (BAS): a feature of the extraradical mycelium of symbiotic arbuscular mycorrhizal  
613           fungi. *New Phytol.* **139**, 375–388 (1998).
- 614   26.   B. Bago *et al.*, Carbon export from arbuscular mycorrhizal roots involves the  
615           translocation of carbohydrate as well as lipid. *Plant Physiol.* **131**, 1496–1507 (2003).
- 616   27.   B. Bago *et al.*, Translocation and utilization of fungal storage lipid in the arbuscular  
617           mycorrhizal symbiosis. *Plant Physiol.* **128**, 108–124 (2002).
- 618   28.   K. Saito, Y. Kuga-Uetake, M. Saito, Acidic vesicles in living hyphae of an arbuscular  
619           mycorrhizal fungus, *Gigaspora margarita*. *Plant Soil* **261**, 231–237 (2004).
- 620   29.   J. H. Graham, N. C. Hodge, J. B. Morton, Fatty Acid methyl ester profiles for  
621           characterization of glomalean fungi and their endomycorrhizae. *Appl. Environ.*  
622           *Microbiol.* **61**, 58–64 (1995).
- 623   30.   M. Brands, E. B. Cahoon, P. Dörmann, Palmitvaccenic acid ( $\Delta^{11}$ -*cis*-hexadecenoic  
624           acid) is synthesized by an OLE1-like desaturase in the arbuscular mycorrhiza fungus  
625           *Rhizophagus irregularis*. *Biochemistry* **59**, 1163–1172 (2020).

- 626 31. H. Cheeld, G. Bhutada, F. Beaudoin, P. J. Eastmond, DES2 is a fatty acid  $\Delta 11$   
627 desaturase capable of synthesizing palmitvaccenic acid in the arbuscular mycorrhizal  
628 fungus *Rhizophagus irregularis*. *FEBS Lett.* **594**, 1770–1777 (2020).
- 629 32. T. A. Farazi, G. Waksman, J. I. Gordon, The biology and enzymology of protein  
630 *N*-myristoylation. *J. Biol. Chem.* **276**, 39501–39504 (2001).
- 631 33. J. A. Boutin, Myristoylation. *Cell. Signal.* **9**, 15–35 (1997).
- 632 34. J. I. Gordon, R. J. Duronio, D. A. Rudnick, S. P. Adams, G. W. Coke, Protein  
633 *N*-myristoylation. *J. Biol. Chem.* **266**, 8647–8650 (1991).
- 634 35. D. R. Johnson, R. S. Bhatnagar, L. J. Knoll, J. I. Gordon, Genetic and biochemical  
635 studies of protein *N*-myristoylation. *Annu. Rev. Biochem.* **63**, 869–914 (1994).
- 636 36. J. K. Lodge, E. Jackson-Machelski, D. L. Toffaletti, J. R. Perfect, J. I. Gordon,  
637 Targeted gene replacement demonstrates that myristoyl-CoA: protein  
638 *N*-myristoyltransferase is essential for viability of *Cryptococcus neoformans*. *Proc.*  
639 *Natl. Acad. Sci. USA* **91**, 12008–12012 (1994).
- 640 37. R. A. Weinberg *et al.*, Genetic studies reveal that myristoylCoA:protein  
641 *N*-myristoyltransferase is an essential enzyme in *Candida albicans*. *Mol. Microbiol.*  
642 **16**, 241–250 (1995).
- 643 38. R. Duronio, D. Towler, R. Heuckeroth, J. Gordon, Disruption of the yeast *N*-myristoyl

- 644 transferase gene causes recessive lethality. *Science* **243**, 796–800 (1989).
- 645 39. P. A. Olsson, I. M. van Aarle, M. E. Gavito, P. Bengtson, G. Bengtsson, <sup>13</sup>C  
646 incorporation into signature fatty acids as an assay for carbon allocation in arbuscular  
647 mycorrhiza. *Appl. Environ. Microbiol.* **71**, 2592–2599 (2005).
- 648 40. B. Bago *et al.*, Carbon metabolism in spores of the arbuscular mycorrhizal fungus  
649 *Glomus intraradices* as revealed by nuclear magnetic resonance spectroscopy. *Plant*  
650 *Physiol.* **121**, 263–272 (1999).
- 651 41. P. J. Lammers *et al.*, The glyoxylate cycle in an arbuscular mycorrhizal fungus.  
652 Carbon flux and gene expression. *Plant Physiol.* **127**, 1287–1298 (2001).
- 653 42. K. Akiyama, K. Matsuzaki, H. Hayashi, Plant sesquiterpenes induce hyphal branching  
654 in arbuscular mycorrhizal fungi. *Nature* **435**, 824–827 (2005).
- 655 43. G. Nagahashi, D. D. Douds, Jr., The effects of hydroxy fatty acids on the hyphal  
656 branching of germinated spores of AM fungi. *Fungal Biol.* **115**, 351–358 (2011).
- 657 44. H. Koltai *et al.*, A tomato strigolactone-impaired mutant displays aberrant shoot  
658 morphology and plant interactions. *J. Exp. Bot.* **61**, 1739–1749 (2010).
- 659 45. J. Marleau, Y. Dalpé, M. St-Arnaud, M. Hijri, Spore development and nuclear  
660 inheritance in arbuscular mycorrhizal fungi. *BMC Evol. Biol.* **11**, 51 (2011).
- 661





663 **Figure legends**

664

665 **Fig. 1.** Asymbiotic culture of *R. irregularis* in the presence of fatty acids. (A) Standardized  
666 growth increment (see Materials and Methods) during eight weeks in the modified SC solid  
667 medium supplemented with potassium salts of fatty acids, fatty acids and  $\beta$ -MAGs, or fatty  
668 acid-BSA conjugates. Horizontal lines indicate mean values ( $n = 3-4$ ). (B) Time course of  
669 biomass production at different amounts of potassium myristate (Myr-K). Error bars represent  
670 95% confidence intervals ( $n = 5-6$ ). (C) Biomass production in an immobilized cell culture  
671 system. Immobilized fungal spores were incubated in half-strength modified SC medium  
672 supplemented with combinations of potassium myristate and sugars after eight weeks of  
673 cultivation. The boxes show the first quartile, the median, and the third quartile; the whiskers  
674 reach to the  $1.5\times$  interquartile range, and data points for each treatment are displayed ( $n = 6$ ).  
675 The same lowercase letter indicates no significant difference (Tukey's test,  $P < 0.05$ ; A-C).  
676 Fungal growth in the solid medium without fatty acids (D and E) or with potassium myristate  
677 (F-P). (D) Germinating spore. Hyphal elongation without fatty acids (E) and with potassium  
678 myristate (F) after eight weeks of cultivation. (G) DPC-like structures formed around a parent  
679 spore. (H) Radial growth of fungal mycelium. (I) Elongation of runner hyphae. (J) Branching  
680 of runner hyphae and formation of BAS. (K) Magnified image of BAS. (L) Front line of  
681 elongated mycelium. The medium around the fungal hyphae became transparent, indicating

682 that the precipitates of metal soaps were solubilized. (*M*) Myristate-induced secondary spores  
683 generated around the parent spores. (*N* and *O*) Myristate-induced spores formed along the  
684 runner hyphae. (*P*) Magnified image of a myristate-induced spore. Fungal growth in the  
685 immobilized cell culture system without fatty acids (*Q*) and with potassium myristate (*R*)  
686 after eight weeks of cultivation. See *SI Appendix*, Table S2 for sample details. BAS, branched  
687 absorbing structure; BH, branching hypha; DPC, densely packed coil; MS, myristate-induced  
688 spore; P, precipitate of metal soaps; PS, parent spore; PT, Phytigel tablet; RH, runner hypha;  
689 and SH, subtending hypha. Scale bars: 200  $\mu\text{m}$  (*D–G* and *I–P*) and 1,000  $\mu\text{m}$  (*H*, *Q*, and *R*).

690

691 **Fig. 2.** Spore formation of *R. irregularis* under asymbiotic conditions. Number (*A*) and  
692 diameter (*B*) of myristate-induced spores generated in solid medium containing different  
693 amounts of potassium myristate (Myr-K). Spore diameter was measured after eight weeks of  
694 cultivation. (*C*) Number of myristate-induced spores in an immobilized cell culture  
695 containing 0.5 mM potassium myristate and 5 mM monosaccharides after eight weeks of  
696 cultivation. Error bars in (*A*) represent 95% confidence intervals. For each boxplot, the boxes  
697 show the first quartile, the median, and the third quartile; the whiskers reach to the 1.5 $\times$   
698 interquartile range, and data points for each treatment are displayed. The same lowercase  
699 letter indicates no significant difference (Tukey's test,  $P < 0.05$ , data were transformed as

700  $\log_{10}(x+0.5)$ ,  $n = 3-6$  (A); Steel–Dwass test,  $P < 0.05$  (B); and Tukey’s test,  $P < 0.05$ ,  $n = 6$   
701 (C). (D–G) Inoculation of a single myristate-induced spore to carrot hairy roots. (D)  
702 Inoculated spore that was produced in the immobilized cell culture containing potassium  
703 myristate and xylose. (E) Germination of the inoculated spore. (F) Daughter spores (DS) on  
704 extraradical mycelia (ERM) emerged from the carrot hairy roots. (G) Colonization of the  
705 carrot hairy roots by *R. irregularis*. Arrows indicate an inoculated myristate-induced spore. A,  
706 arbuscule; and V, vesicle. See *SI Appendix*, Table S2 for sample details. Scale bars: 500  $\mu\text{m}$ .

707

708 **Fig. 3.** Utilization of fatty acids by *R. irregularis* under asymbiotic conditions. (A) Uptake of  
709 the fluorescently labeled fatty acid derivative C<sub>1</sub>-BODIPY 500/510 C<sub>12</sub>. A cluster of BAS  
710 (upper panels), magnified BAS (middle panels), and a single BAS hypha (lower panels).  
711 Optical sections captured using a confocal laser scanning microscope are projected.  
712 Fluorescence images and superimposed bright field images are shown. BAS, branched  
713 absorbing structure; and RH, runner hypha. Scale bars, 200  $\mu\text{m}$ . (B) Gene expression analysis  
714 in *R. irregularis* 3 h after the application of potassium myristate (Myr-K) or water (control)  
715 shown by real-time RT-PCR. The *R. irregularis* elongation factor 1 beta and actin genes were  
716 used for normalization. For each boxplot, the boxes show the first quartile, the median, and  
717 the third quartile; the whiskers reach to the 1.5 $\times$  interquartile range, and data points for each

718 treatment are displayed (Myr-K:  $n = 5$ ; control:  $n = 6$ ).  $P$  values were calculated using the  
719 Wilcoxon–Mann–Whitney test. See *SI Appendix*, Table S4 for gene details. GC, glyoxylate  
720 cycle; GNG, gluconeogenesis. (C) Incorporation of carbon derived from exogenous myristate  
721 into cell wall components of *R. irregularis*. AM fungi were grown in the immobilized cell  
722 culture system and supplemented with 0.5 mM neutralized myristic acid (Myr) or  
723 [ $1\text{-}^{13}\text{C}_1$ ]myristic acid ( $^{13}\text{C}_1$ Myr) for eight weeks. Glucosamine (GlcN) was extracted from  
724 the cell walls of the fungal materials without parent spores. The relative abundance of  
725 [ $^{13}\text{C}_1$ ]GlcN ( $[\text{M}+1+\text{H}]^+$ ,  $m/z$  181.19) to [ $^{12}\text{C}$ ]GlcN ( $[\text{M}+\text{H}]^+$ ,  $m/z$  180.19) was calculated by  
726 LC-MS analysis. The reported  $P$  value is based on Student's  $t$ -test (Myr:  $n = 8$ ; [ $^{13}\text{C}_1$ ]Myr:  $n$   
727 = 7). (D) ATP content in *R. irregularis* 12 h after the application of potassium myristate or  
728 distilled water (control) in the presence or absence of CCCP. Horizontal lines indicate the  
729 mean values ( $n = 4$ ).  $P$  values are based on Student's  $t$ -test with Bonferroni correction. (E)  
730  $^{13}\text{C}$ -NMR spectra of triacylglycerol (TAG) isolated from mycelial extracts of *R. irregularis*  
731 grown in monoxenic root organ culture (upper panel), asymbiotic culture supplemented with  
732 1 mM neutralized myristic acid (middle panel), or [ $1\text{-}^{13}\text{C}_1$ ]myristic acid (lower panel). Inset:  
733 chemical structure of a TAG. Experiments were repeated twice independently with similar  
734 results.  
735

736 **Fig. 4.** Effects of fatty acid mixtures on the growth and sporulation of *R. irregularis*. AM  
737 fungi were cultured in the immobilized cell culture system and supplemented with potassium  
738 myristate (0.1 or 0.5 mM Myr-K), either alone or in combination with 0.5 mM C16:0 *sn*-2  
739 monoacylglycerols ( $\beta$ -MAG C16:0) or potassium palmitate (Pal-K) ( $n = 4-6$ ). See *SI*  
740 *Appendix*, Table S2 for sample details. Standardized growth increment (A) and number (B)  
741 and diameter (C) of myristate-induced secondary spores after eight weeks of cultivation. For  
742 each boxplot, the boxes show the first quartile, the median, and the third quartile; the  
743 whiskers reach to the 1.5 $\times$  interquartile range, and data points for each treatment are  
744 displayed. The same lowercase letter indicates that there is no significant difference (Tukey's  
745 test,  $P < 0.05$ ). (D) Composition of C14:0, C16:0, and C16:1 $\Delta$ 11 fatty acids of triacylglycerol  
746 (TAG) isolated from fungal materials grown in asymbiotic culture and supplemented with 0.5  
747 mM neutralized [1- $^{13}$ C<sub>1</sub>]myristic acid ([ $^{13}$ C<sub>1</sub>]Myr) or 0.1 mM potassium myristate plus 0.5  
748 mM neutralized [1- $^{13}$ C<sub>1</sub>]palmitic acid (Myr + [ $^{13}$ C<sub>1</sub>]Pal). (E) Percentage of [ $^{13}$ C], derived  
749 from the labeled myristate or palmitate, incorporated into TAG. Horizontal lines indicate  
750 mean values ( $n = 3-4$ ). (F) Incorporation of carbon derived from exogenous myristate and  
751 palmitate into cell wall components of *R. irregularis*. AM fungi were supplemented with  
752 labeled or non-labeled, neutralized myristic acid (0.5 mM) and palmitic acid (0.5 mM).  
753 Glucosamine (GlcN) was extracted from fungal cell walls without parent spores. Relative

754 abundance of [ $^{13}\text{C}_1$ ]GlcN ( $[\text{M}+1+\text{H}]^+$ ,  $m/z$  181.19) to [ $^{12}\text{C}$ ]GlcN ( $[\text{M}+\text{H}]^+$ ,  $m/z$  180.19) was  
755 calculated using data from LC-MS analysis. The same lowercase letter indicates no  
756 significant difference (Tukey's test,  $P < 0.05$ ,  $n = 5$ ).  
757

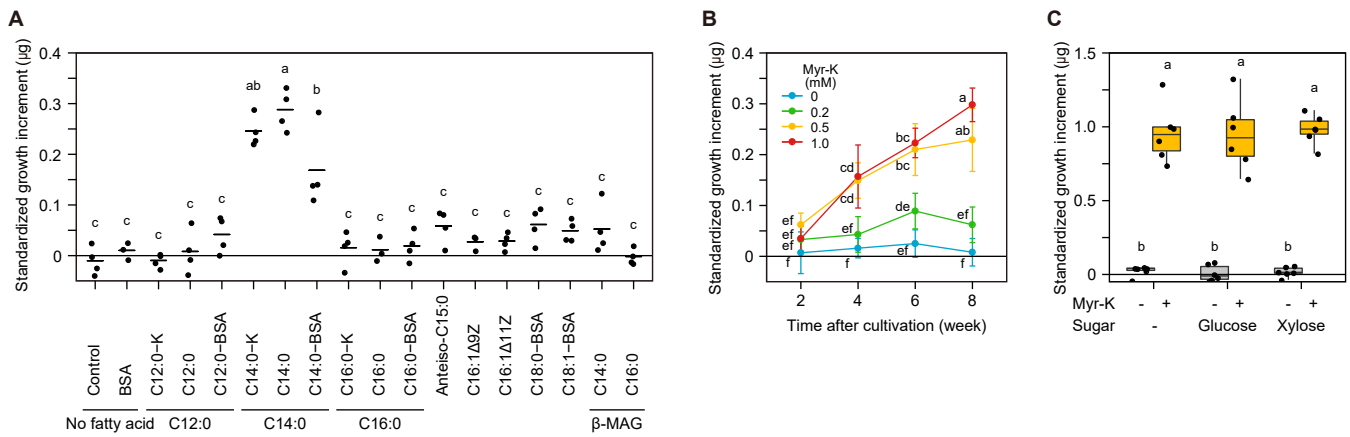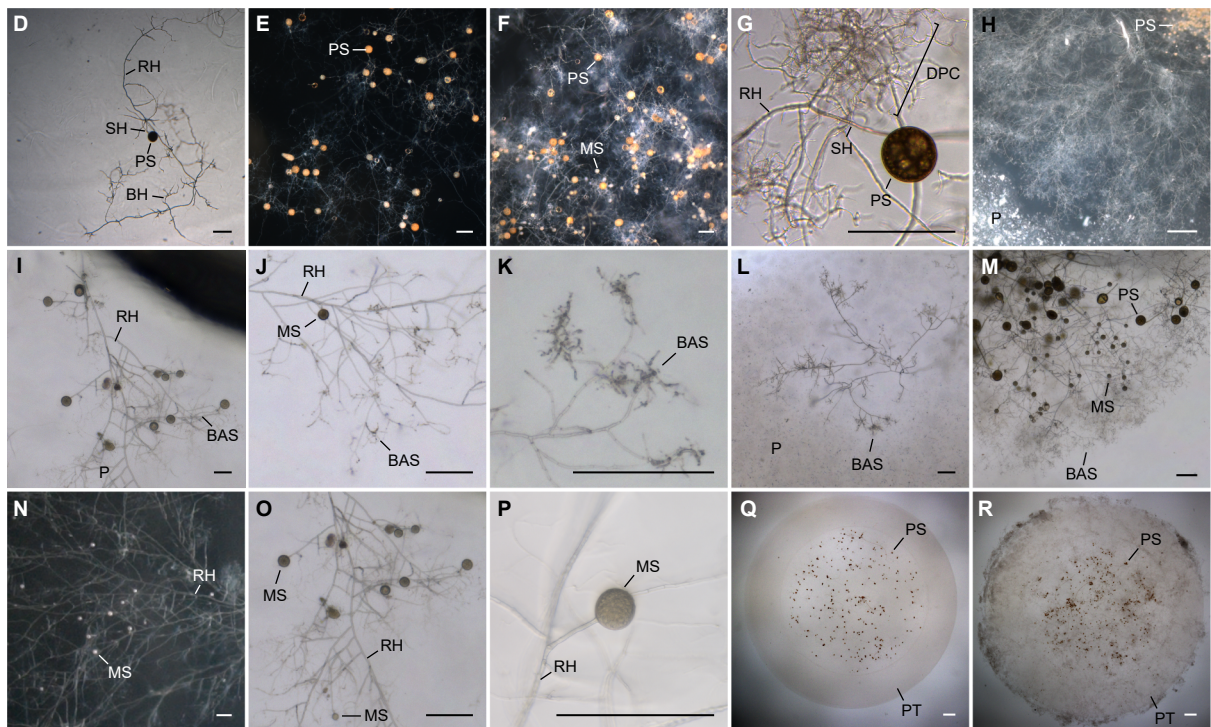

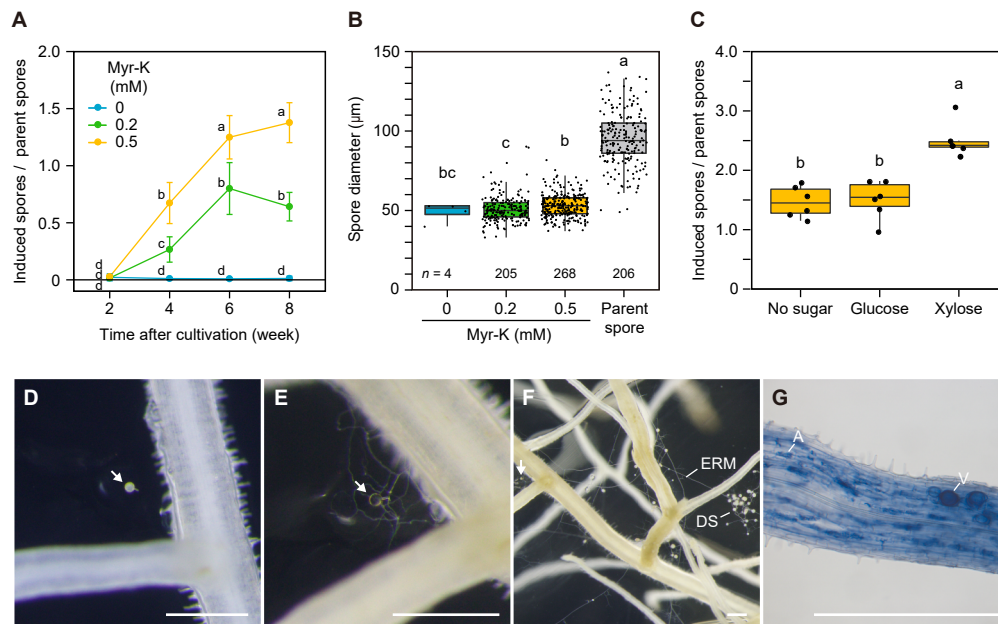



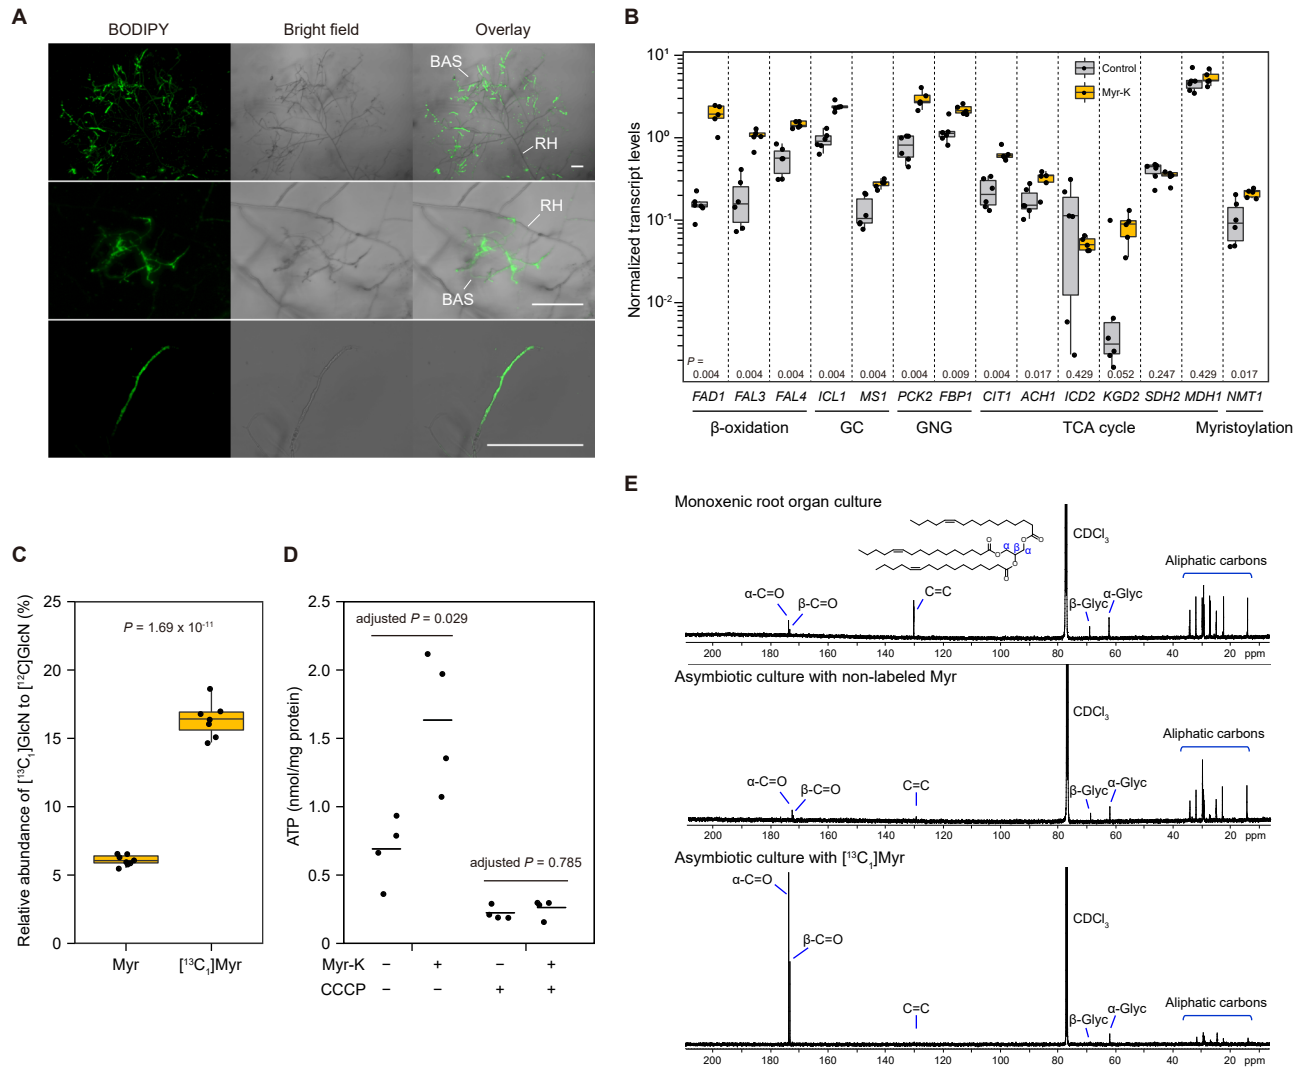

FIG. 4

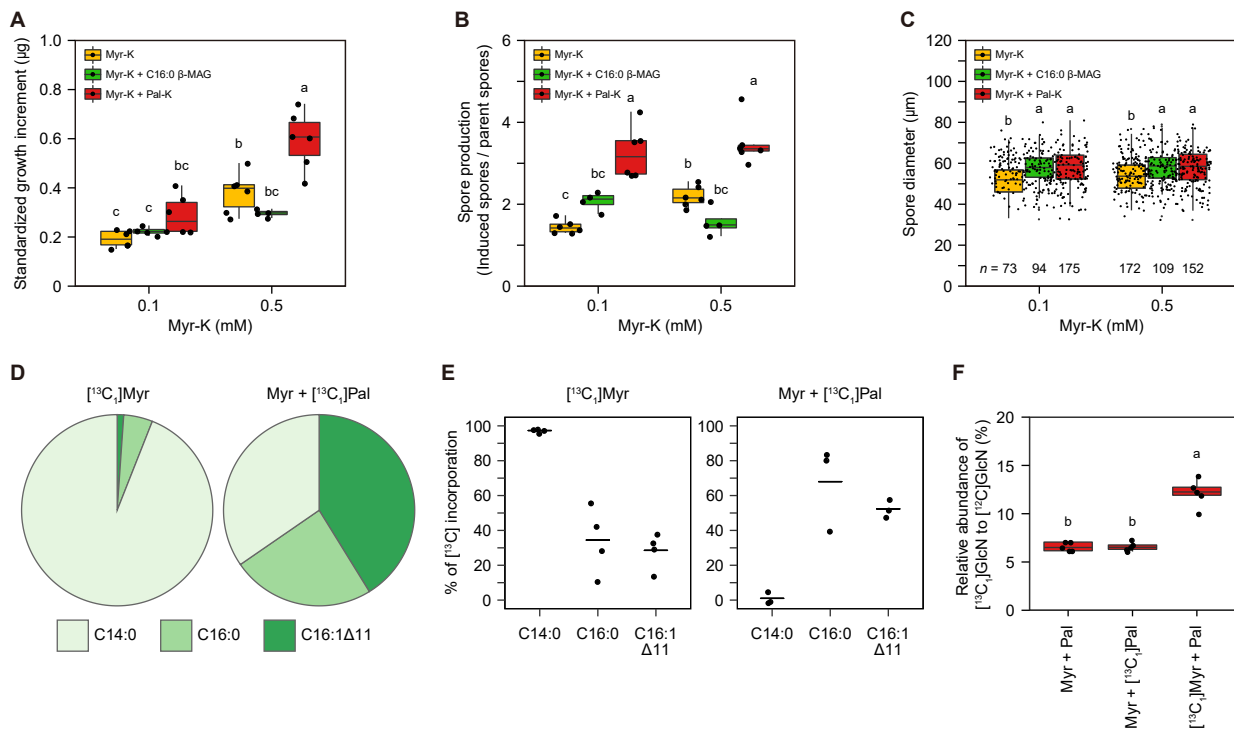

Source: https://www.biorxiv.org/content/10.1101/731489v2.full.pdf
