# Supplementary material for: Myristate can be used as a carbon and energy source for the asymbiotic growth of arbuscular mycorrhizal fungi
Source: bioRxiv or medRxiv preprint supplement (doi:10.1101/731489), 2020-09-03
Supplement: Supplementary file [file media-1.pdf]

*SI Appendix*

**Myristate as a carbon and energy source for the asymbiotic growth of the arbuscular mycorrhizal fungus *Rhizophagus irregularis***

Yuta Sugiura, Rei Akiyama, Sachiko Tanaka, Koji Yano, Hiromu Kameoka, Masayoshi Kawaguchi, Kohki Akiyama, Katsuharu Saito\*

\*Correspondence to: [saitok@shinshu-u.ac.jp](mailto:saitok@shinshu-u.ac.jp)

**This PDF file includes:**

Extended Methods

Figs. S1 to S6

Tables S1 to S4

Captions for movie S1

**Other supplementary materials for this manuscript include the following:**

Movie S1

## ***Extended Methods***

**Biological materials.** Sterile spore suspension of the AM fungus *Rhizophagus irregularis* DAOM197198 (or DAOM181602, another voucher number for the same fungus) was purchased from Premier Tech. Contaminated hyphae in the spore suspension were removed by density-gradient centrifugation using gastrografin (972 mM amidotrizoate, 815 mM meglumine, and 157 mM sodium hydroxide). Five mL of 8%, 16%, 32%, and 48% gastrografin solution was carefully poured to form layers in a 50 mL centrifuge tube, and then 20 ml of spore suspension (approximately 4,000 spores ml<sup>-1</sup>) was layered on top of the gastrografin solution. After centrifugation at 3,500 rpm for 15 min at room temperature using a swing rotor, middle layers containing spores were collected and transferred to a new tube. The collected layers were diluted with sterilized water and then centrifuged again. After the removal of the supernatant, spores were suspended in sterilized water, adjusted to approximately 10,000 spores ml<sup>-1</sup>, and stored at 4 °C for later use.

**Asymbiotic culture.** Approximately 300–400 spores of *R. irregularis* were inoculated on 0.3% Phytigel (Sigma-Aldrich) plates containing modified SC medium (1.7 g l<sup>-1</sup> yeast nitrogen base [MP Biomedicals], 2.0 g l<sup>-1</sup> complete SC mixture [Formedium], 5 mM ammonium sulfate, 1 mM glycerol, 5 mg l<sup>-1</sup> thiamine hydrochloride, 5 mg l<sup>-1</sup> nicotinic acid, 5 mg l<sup>-1</sup> pyridoxal phosphate, and appropriate amounts of fatty acids) and then covered with 0.3% Phytigel dissolved in 3 mM magnesium sulfate in a 12-well culture plate. For the liquid culture, Phytigel was removed from the medium. All fatty acids and fatty acid salts were obtained from Sigma-Aldrich, Tokyo Chemical Industry, and Wako Pure Chemical Industries, and 2-myristoylglycerol and 2-palmitoylglycerol were purchased from Santa Cruz Biotechnology. Three types of fatty acids were added to the medium: fatty acid salts, fatty acids in an organic solvent, or fatty acids conjugated with BSA. Stock solutions of 100 mM free fatty acids and potassium salts of fatty acids were prepared by dissolving in ethanol and distilled water, respectively. For the preparation of fatty acid–BSA conjugates, an equal amount of 100 mM fatty acid was dissolved in ethanol, and 20% fatty acid-free BSA (Sigma-Aldrich) solution was mixed well and added with distilled water to generate 10 mM final concentration of fatty acid. More BSA solution was added to solubilize stearic acid. The plates were incubated at 28 °C in the dark. Hyphal elongation was observed under the dissecting microscope Stemi 508 (Carl Zeiss) and light microscope Primovert (Carl Zeiss). Digital images were captured with a digital CCD camera AxioCam MRc5 (Carl Zeiss) operated with AxioVision (Carl Zeiss). Fully focused images were captured on the microscope with BZ-X800 (Keyence).

**Immobilized cell culture.** An overview of the immobilized cell culture system is represented

in the *SI Appendix* (Fig. S3A). Thirty-five mL of 0.75% Phytigel containing 3 mM magnesium sulfate was poured into a 90 mm Petri dish and solidified. A Phytigel tablet (6 mm high and 17.5 mm wide) with a circular incision (3 mm deep and 11.5 mm wide) was cut out using a sterile double cork borer (inner diameter: 11.5 and 17.5 mm, respectively). The gel within the circular incision on the top side of the gel tablet was removed to 3 mm deep using a spatula or disposable pipette tip connected to an aspirator to prepare a hole for spore inoculation. To flatten the bottom of the hole, a small amount of 0.75% Phytigel was added. Approximately 300–400 spores were placed in the hole and covered with 0.75% Phytigel containing 3 mM magnesium sulfate. The Phytigel tablets containing spores were transferred into a six-well culture plate. Each well was filled with 5 mL of full- or half-strength modified SC liquid medium with or without 0.5 mM potassium myristate and monosaccharides (glucose and xylose). AM fungi were grown at 28 °C in the dark. During the culture, the medium was changed once a month.

### **Measurement of fungal biomass.**

Gels containing fungal materials in wells of a six-well culture plate were cut using a knife. A 1.5× volume of citrate buffer (8.3 mM trisodium citrate, 1.7 mM citric acid, and 1% Triton X-100; pH 6.0) was added to the well and mixed using a spatula. The plate was incubated at 50 °C for 20 min. The melted gel, including fungal materials, was transferred to a 5 mL tube and further incubated at 50 °C for 20 min. The sample was centrifuged at 3,500 rpm for 10 min at room temperature using a swing rotor. After the removal of the supernatant, approximately 5 mL of the citrate buffer was added, incubated at 50 °C for 10 min, and then centrifuged again. This step was repeated once. Fungal pellets were suspended in the remaining 1 mL of the citrate buffer and transferred to an antistatic 1.5 mL tube. After centrifugation at 3,500 rpm for 10 min, the supernatant was removed. The fungal pellet was washed with 1 mL of distilled water by centrifuging at 3,500 rpm for 10 min three times. After centrifugation at 12,000 rpm for 10 min using an angle rotor, the remaining water was completely removed. The pellet was dried at 70 °C for 48 h. After cooling down in a desiccator, fungal materials were weighed using a micro analytical balance (BM-252, A&D). The number of inoculated spores in the well was counted in advance under a dissecting microscope. The standardized growth increment of *R. irregularis* was calculated by dividing the total fungal dry weight in a well by the number of inoculated spores and subtracting the mean dry weight of an inoculated spore.

**Spore morphology and germination assay.** Myristate-induced spores were produced by an immobilized cell culture system in the presence of 0.5 mM potassium myristate in a half-strength modified SC medium for approximately three months. Myristate-induced and symbiotically generated spores were mounted with polyvinyl alcohol–lactic acid–glycerol (PVLG) or Melzer’s reagent for microscopic observation using a light microscope (Axio Imager

D1 microscope, Carl Zeiss). Spores were incubated with 10  $\mu$ M SYTO 13 green fluorescent nucleic acid stain (Thermo Fisher) for 2 h and observed by epifluorescence microscopy (Axio Imager D1 microscope). The fluorescence was excited with the band-pass filter BP470/40, and emitted fluorescence was detected with BP525/50. For spore germination assay, myristate-induced and symbiotically generated spores were placed onto 0.3% Phytigel containing 3 mM magnesium sulfate and incubated at 28 °C for one week. Spore germination was examined under a dissecting microscope.

**Single spore inoculation.** A single myristate-induced spore produced by an immobilized cell culture system in the presence of 0.5 mM potassium myristate and 5 mM xylose in a half-strength modified SC medium was placed onto carrot hairy root plates using a pipette according to Kameoka et al. (1). The production of daughter spores on extraradical hyphae emerging from hairy roots was observed under a dissecting microscope. AM fungal colonization was confirmed by trypan blue staining (2).

**Fatty acid uptake.** Fatty acid uptake was evaluated using a fluorescent fatty acid analogue, 4,4-difluoro-5-methyl-4-bora-3a,4a-diaza-s-indacene-3-dodecanoic acid ( $C_1$ -BODIPY 500/510  $C_{12}$ , Thermo Fisher Scientific). *R. irregularis* was grown in an immobilized cell culture system with modified SC medium containing 0.5 mM potassium myristate without sugars for 4 or 6 weeks. Fungal hyphae were stained with 0.5 mM  $C_1$ -BODIPY 500/510  $C_{12}$  in modified SC medium. After 10-minute incubation, fungal hyphae protruding outside a Phytigel tablet were observed using a laser scanning confocal microscope (Leica TCS SP2). For the samples incubated for 1 or 5 days in the medium containing the fluorescent probe, a Phytigel tablet containing fungal materials was melted by adding citrate buffer. Fluorescent signals were observed under an epifluorescence microscope (Axio Imager D1 microscope). For laser scanning confocal microscopy, the fluorescence of  $C_1$ -BODIPY 500/510  $C_{12}$  was excited using a 488-nm wavelength argon laser, and fluorescence between 500 and 550 was detected. For epifluorescence microscopy, the fluorescence was excited with the band-pass filter BP470/40, and emitted fluorescence was detected with BP525/50. Digital images were captured with the digital CCD camera AxioCam MRm operated with AxioVision.

**LC-MS analysis of glucosamine.** [ $1-^{13}C$ ]Myristic acid (Taiyo Nippon Sanso) and non-labeled myristic acid were dissolved in 200 mM potassium hydroxide to 100 mM final concentration of fatty acids. *R. irregularis* was cultured in a modified SC solid medium supplied with 1 mM neutralized myristate for two months. Approximately 1–2 mg dry fungal materials per sample were recovered from the solid medium as described above. Glucosamine derived from fungal biomass was extracted according to previous reports (3, 4) with some modifications. Briefly,

fungus materials were washed in cold 0.25 M hydrochloric acid solution twice for 5 and 35 min, respectively. After centrifugation at 12,000 rpm for 5 min, the fungus pellet was rinsed with Milli-Q water. The sample was then incubated in 1 mL of 0.2 M sodium hydroxide for 6 h at room temperature. After centrifugation, the pellet was further incubated in 1 mL of fresh 0.2 M sodium hydroxide at 70 °C for 17 h. After cooling to room temperature, the sample was washed with Milli-Q water four times and dried at 70 °C for several hours. Acid hydrolysis was carried out with 1 mL of 6 M hydrochloric acid solution at 70 °C for 16 h. A total of 40 µL of each extract or glucosamine hydrochloride standard solution (10 µg mL<sup>-1</sup>) was evaporated under reduced pressure, dissolved in 50% acetonitrile, and filtered through 0.45 µm membrane filters. The chromatographic separation was performed using the ACQUITY UPLC System (Waters), where 20 µL of sample was injected onto a COSMOSIL Sugar-D column (4.6 mm × 250 mm, Nacalai Tesque) at 30 °C, and the solute was isocratically eluted using 75% acetonitrile containing 0.05% formic acid as the mobile phase at a flow rate of 0.75 mL min<sup>-1</sup>. A glucosamine standard was detected with a retention time of 2.65 min. The mass spectrometer was operated in a positive ESI mode. The nebulizer and desolvation gas flows were 50 and 700 l h<sup>-1</sup>, respectively. The capillary voltage was set at 2.8 kV, the cone voltage at 45 V, the source temperature at 120 °C, and the desolvation gas temperature at 350 °C. Data were collected using MassLynx version 4.1 (Waters). The relative intensities of the molecular ion peaks of glucosamine ([M+H]<sup>+</sup>, *m/z* 180.19; [M+1+H]<sup>+</sup>, *m/z* 181.19; and [M+2+H]<sup>+</sup>, *m/z* 182.19) were monitored. The relative fractions of M+0, M+1, and M+2 in the glucosamine standard solution were 92.9%, 7.1%, and 0%, respectively.

**<sup>13</sup>C-NMR analysis of triacylglycerols.** [1-<sup>13</sup>C]Myristic acid (Cambridge Isotope Laboratories, Inc.) was dissolved in 200 mM potassium hydroxide to a 100 mM final concentration of fatty acids. *R. irregularis* was cultured in a modified SC solid medium supplied with 1 mM neutralized [1-<sup>13</sup>C]myristate for 73 days. Approximately 43 mg of wet fungus materials were recovered from solid medium by gel solubilization as described above followed via vacuum filtration through filter paper. Lipids derived from fungus biomass were extracted with 3 mL of chloroform–methanol (2:1) via sonication for 30 min. After filtration, the lipid extract solution was concentrated by nitrogen gas. The concentrate was purified by preparative silica gel TLC (Kieselgel 60 F<sub>254</sub>, Merck) using *n*-hexane–diethyl ether–acetic acid (80:30:1) as a developing solvent to yield 1.1 mg of triacylglycerol. For NMR analysis, the triacylglycerol was dissolved in 600 µL of CDCl<sub>3</sub>. The <sup>13</sup>C-NMR spectra were recorded at 125 MHz on a JNM-ECZ500R spectrometer (JEOL) using the default parameter settings. The chemical shifts were referenced to the solvent peak (CDCl<sub>3</sub> δ<sub>c</sub> 77.0) as an internal standard. 1.6 mg of triacylglycerol prepared from 27 mg of wet fungus materials of *R. irregularis* grown in a monoxenic root organ culture

(Premier Tech) was also subjected to  $^{13}\text{C}$ -NMR analysis as above.

**Determination of ATP content.** Five hundred spores of *R. irregularis* were incubated in 100  $\mu\text{L}$  of sterilized water at 28 °C for 5 days. Potassium myristate was added to the germinating spores at a final concentration of 0.5 mM. For the control, the protonophore carbonyl cyanide m-chlorophenylhydrazone (CCCP) was simultaneously added at a final concentration of 50  $\mu\text{M}$ . The germinating spores were incubated for 12 h. After centrifugation at 3,500 rpm for 10 min, 400  $\mu\text{L}$  of phosphate buffered saline (PBS; pH 7.4) was added to the pellet. The spore suspension was transferred to a 2 mL tube containing a metal crusher (TAITEC) and placed on ice. The sample was crushed with a bead crusher ( $\mu\text{T}$ -12, TAITEC) at 2,200 rpm for 10 s three times. The crushed fungal materials were transferred to a 1.5 mL tube and centrifuged at  $8,000\times g$  for 2 min at 4 °C. The supernatant was recovered and used for determination of ATP and protein concentration. ATP concentration was measured using the CellTiter-Glo Luminescent Cell Viability Assay Kit (Promega) following the manufacturer's instructions. Protein concentration was assayed using the Qubit Protein Assay Kits (Thermo Fisher Scientific). ATP content in the germinating spores was calculated as nmol per mg protein.

**Quantitative RT-PCR.** *R. irregularis* was grown in an immobilized cell culture system with modified SC medium containing 0.5 mM potassium myristate without sugars for 3 weeks. Subsequently, Phytigel tablets containing fungal materials were incubated in a modified SC medium without fatty acids for 11 days to induce fatty acid starvation. During the first three days of starvation, the culture medium was exchanged every day. After the starvation treatment, half of each sample was added to 100 mM potassium myristate to a final concentration of 0.5 mM, and the remaining half of each sample was added the same amount of sterilized water. After a 3 h incubation, fungal hyphae protruding outside a Phytigel tablet were recovered using forceps and immediately immersed in 500  $\mu\text{L}$  of RNAiso Plus (Takara Bio). The fungal hyphae were crushed using the bead crusher  $\mu\text{T}$ -12 with a metal crusher at 2,200 rpm for 10 s three times with cooling on ice. RNA was extracted using RNAiso Plus following the manufacturer's instructions. Isolated RNA was treated with a TURBO DNA-free Kit (Thermo Fisher Scientific) to eliminate contaminating genomic DNA. cDNA was synthesized using a ReverTra Ace qPCR RT Kit (TOYOBO). Semiquantitative PCR was conducted using the StepOne Real-Time PCR System (Thermo Fisher Scientific) with a THUNDERBIRD SYBR qPCR Mix (TOYOBO). Primers used for the qRT-PCR are shown in *SI Appendix* (Table S4). Melting curve analysis confirmed the single peaks. The  $\Delta\Delta\text{Ct}$  method (5) was used to calculate the fold changes of gene expression levels between myristate- and water-treated groups with the *R. irregularis* elongation factor 1 beta (*EF-1 $\beta$* ) gene as an internal control using the R bioconductor package

pcr (6).

**Statistical analysis.** All statistical analyses were performed using R version 3.5.2. To examine the differences among experimental groups, data were analyzed with Student's t-test, Tukey HSD test, and Fisher's exact test, as appropriate. Differences at  $P < 0.05$  were considered to be significant.

## References

1. H. Kameoka, I. Tsutsui, K. Saito, Y. Kikuchi, Y. Handa, T. Ezawa, H. Hayashi, M. Kawaguchi, K. Akiyama, Stimulation of asymbiotic sporulation in arbuscular mycorrhizal fungi by fatty acids. *Nature Microbiology* <http://dx.doi.org/10.1038/s41564-019-0485-7> (24 June 2019).
2. J. M. Phillips, D. S. Hayman, Improved procedures for clearing roots and staining parasitic and vesicular-arbuscular mycorrhizal fungi for rapid assessment of infection. *Trans. Br. Mycol. Soc.* **55**, 158–161 (1970).
3. A. Ekblad A, T. Näsholm, Determination of chitin in fungi and mycorrhizal roots by an improved HPLC analysis of glucosamine. *Plant Soil* **178**, 29–35 (1996).
4. M. A. Olofsson, D. Bylund, Liquid chromatography with electrospray ionization and tandem mass spectrometry applied in the quantitative analysis of chitin-derived glucosamine for a rapid estimation of fungal biomass in soil. *Int. J. Anal. Chem.* **2016**, 8 (2016).
5. K. J. Livak, T. D. Schmittgen, Analysis of relative gene expression data using real-time quantitative PCR and the  $2^{-\Delta\Delta CT}$  method. *Methods* **25**, 402–408 (2001).
6. M. Ahmed, D. R. Kim, pcr: an R package for quality assessment, analysis and testing of qPCR data. *PeerJ.* **6**, e4473 (2018).

**Movie S1.** Translocation of the fluorescently labelled fatty acid derivative C<sub>1</sub>-BODIPY 500/510 C<sub>12</sub> taken up by *R. irregularis*. Fluorescent images of C<sub>1</sub>-BODIPY 500/510 C<sub>12</sub> and superimposed bright field images of *R. irregularis* cultivated using an immobilized cell culture system with the modified SC medium containing 0.5 mM of the fluorescent probe for 10 min.



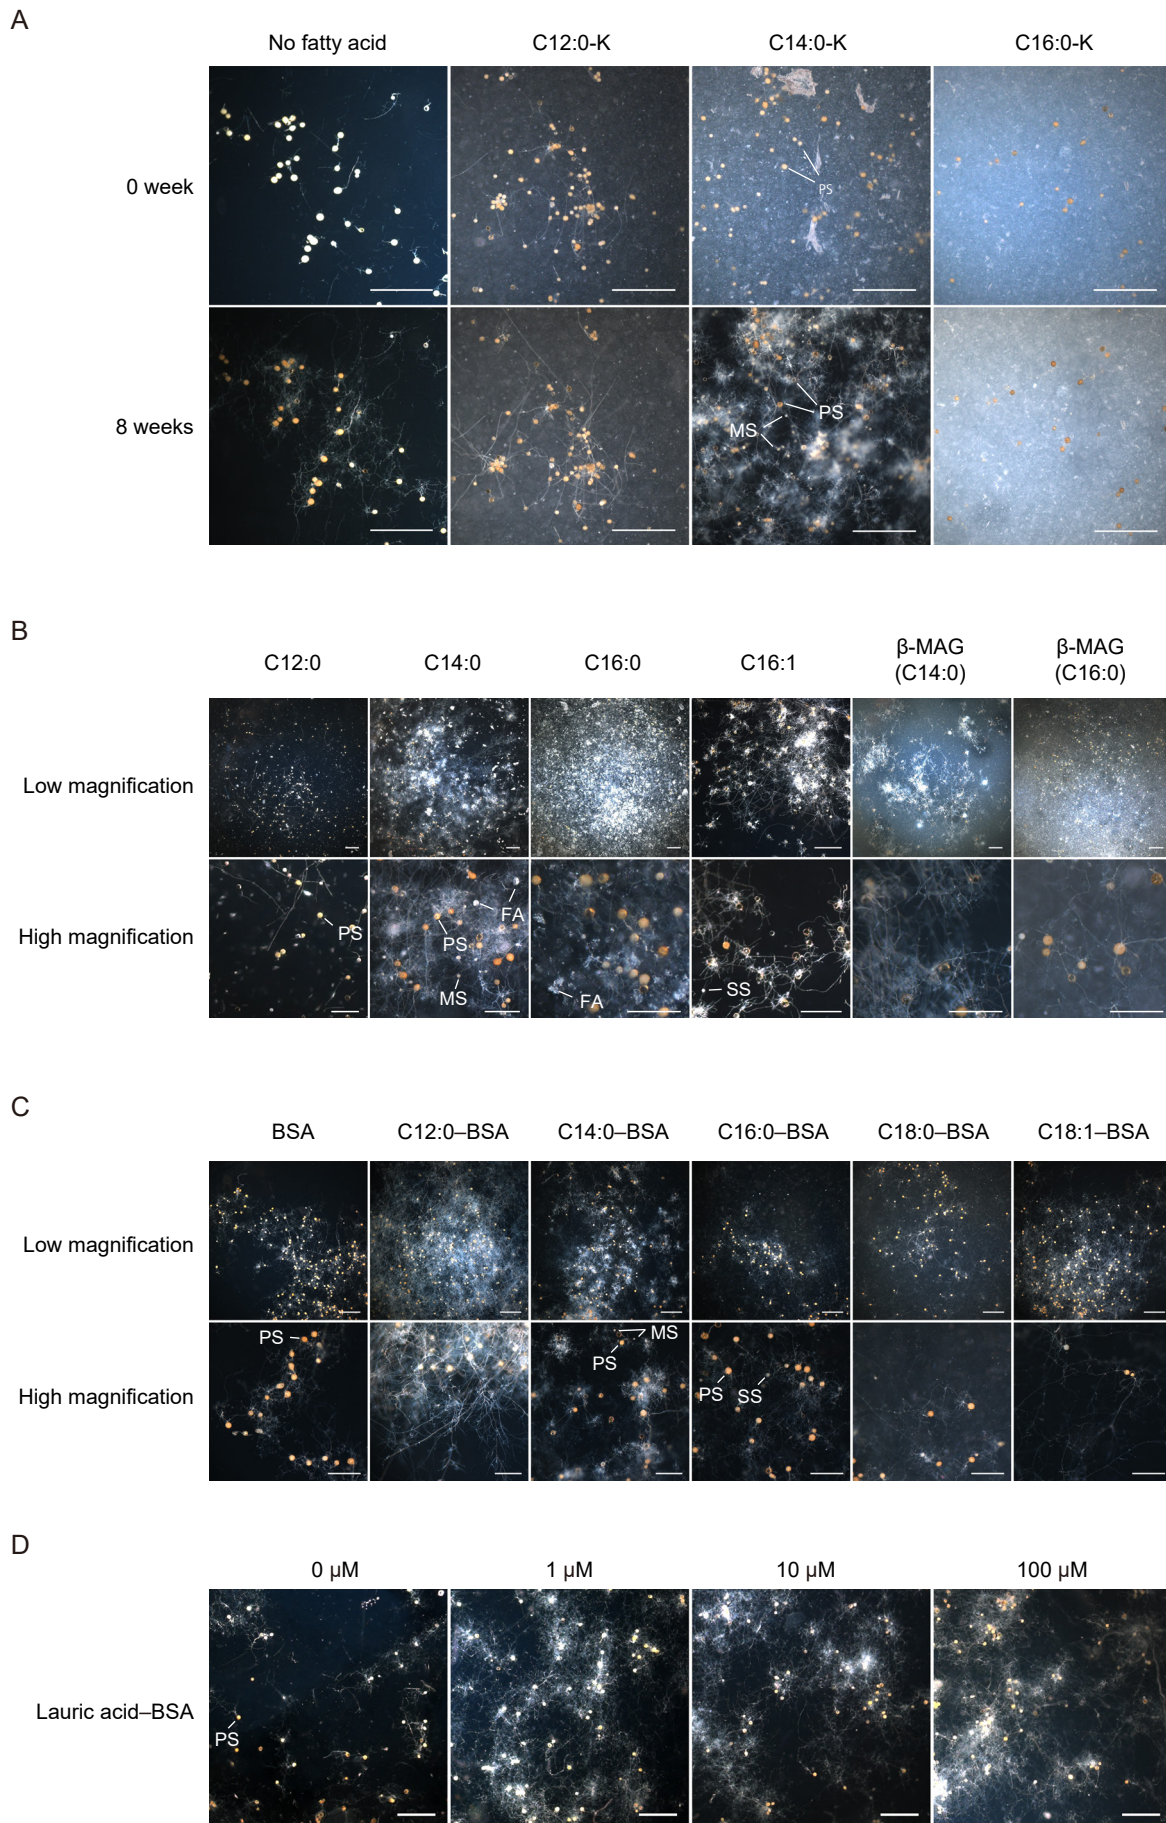

**Fig. S1.** *R. irregularis* cultured in the solid media supplemented with fatty acids. Fungal growth in modified SC medium with (A) 1 mM potassium salts of fatty acids, (B) 1 mM fatty acids or  $\beta$ -MAG, and (C) 0.5 mM fatty acid-BSA conjugates at 8 weeks after inoculation. (D) Effect of different concentrations of lauric acid-BSA conjugates on fungal growth at 8 weeks after inoculation. FA, fatty acid precipitates; MS, myristate-induced spore; PS, parent spore (inoculated) spore; and SS, secondary spore. Scale bars: 1 mm (A, upper panels in B, C, and D) and 0.5 mm (lower panels in B and C).

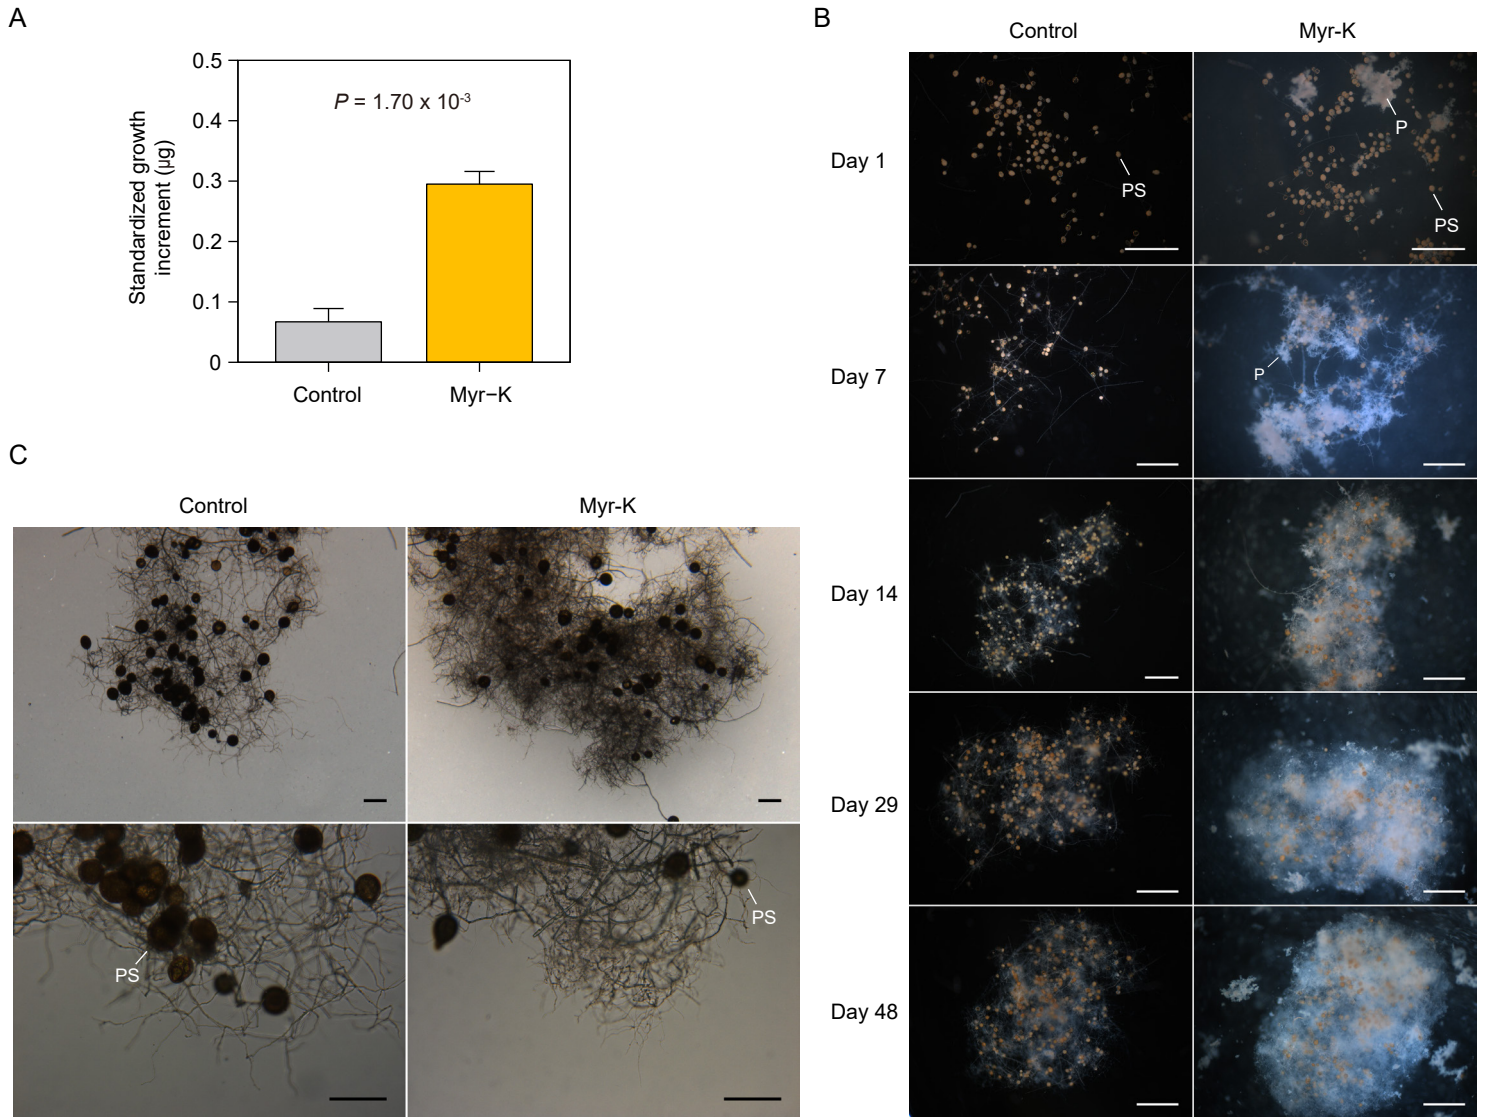

**Fig. S2.** Liquid culture of *R. irregularis*. (A) Biomass production in the modified SC liquid medium supplemented with or without 0.5 mM potassium myristate at 8 weeks after inoculation. Mean + s.e. ( $n = 3$ ). The  $P$  value is based on a  $t$ -test. (B) Time course of fungal growth in the liquid medium without fatty acids or with potassium myristate. When potassium myristate was added to the medium, precipitates of the metal soaps were apparent, which attached to the hyphal surface. (C) Fungal growth in the liquid medium at 8 weeks after inoculation. To remove the metal soaps attached to the hyphal surface, fungal hyphae were washed with citrate buffer including 1% Triton X-100. Images were captured using an inverted microscope. Lower panels are magnified images of fungal hyphae. See *SI Appendix* (Table S2) for sample details. P, precipitate of metal soaps; and PS, parent spore (inoculated spore). Scale bars: 1,000  $\mu\text{m}$  (B) and 200  $\mu\text{m}$  (C).



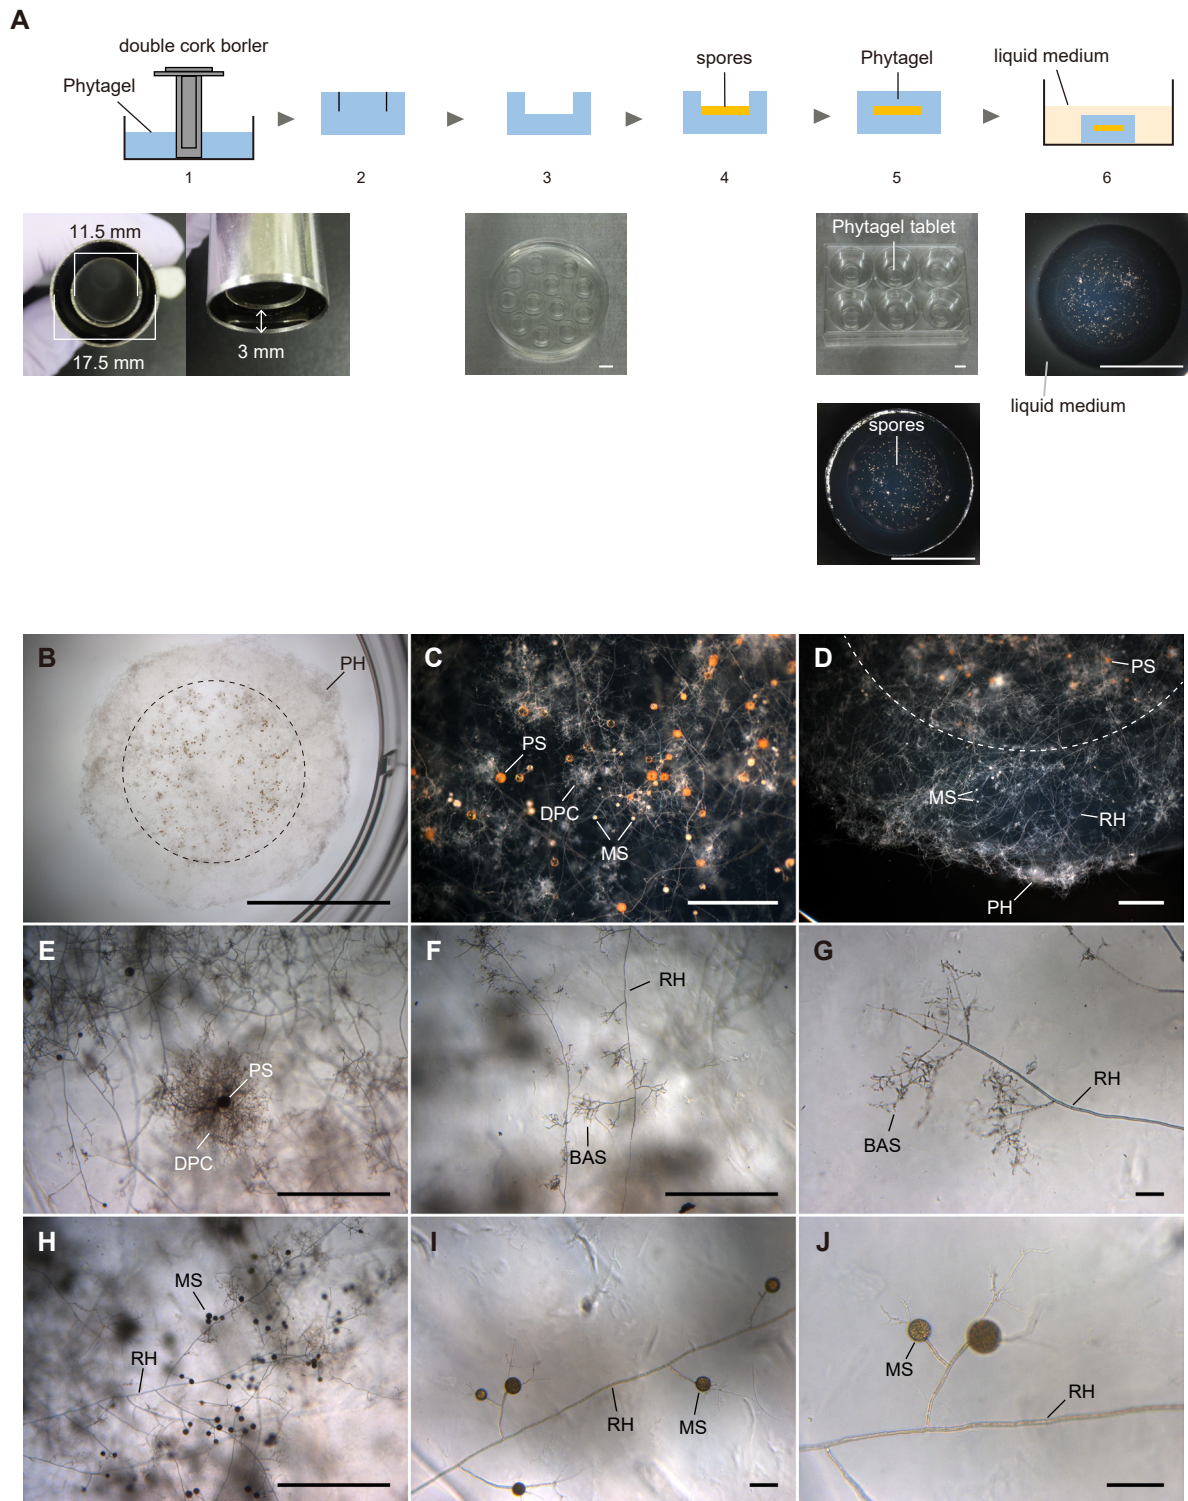

**Fig. S3.** Immobilized cell culture of *R. irregularis*. (A) Schematic presentation of the immobilized cell culture system. Step 1 and 2: Phytigel tablets with a circular incision were cut out using a sterile double cork borer. Step 3: The gel within the circular incision on the top side of the gel tablet was removed for spore inoculation. Step 4 and 5: Spores were placed in the hole and covered with Phytigel. Step 6: The phytigel tablets containing spores were transferred into a six-well culture plate. Each well was filled with the modified SC liquid medium with fatty acids. (B) Fungal growth by immobilized cell culture containing half-strength modified SC medium supplemented with 0.5 mM potassium myristate at 8 weeks after inoculation. A dotted circle shows the area in which fungal spores are inoculated. Magnified images of (C) the inoculated region and (D) peripheral area of a Phytigel tablet. (E) DPC-like structures formed around the inoculated spore. (F) BAS formed along the runner hyphae. (G) Magnified image of BAS. (H–J) Myristate-induced secondary spores formed along the runner hyphae. (I and J) Magnified images of myristate-induced spores. See *SI Appendix* (Table S2) for sample details. BAS, branched absorbing structure; DPC, densely packed coil; MS, myristate-induced spore; PH, hypha protruding outside a phytigel tablet; PS, parent spore (inoculated spore); and RH, runner hypha. Scale bars: 10 mm (A and B), 1 mm (C–F and H), and 0.1 mm (G, I, and J).

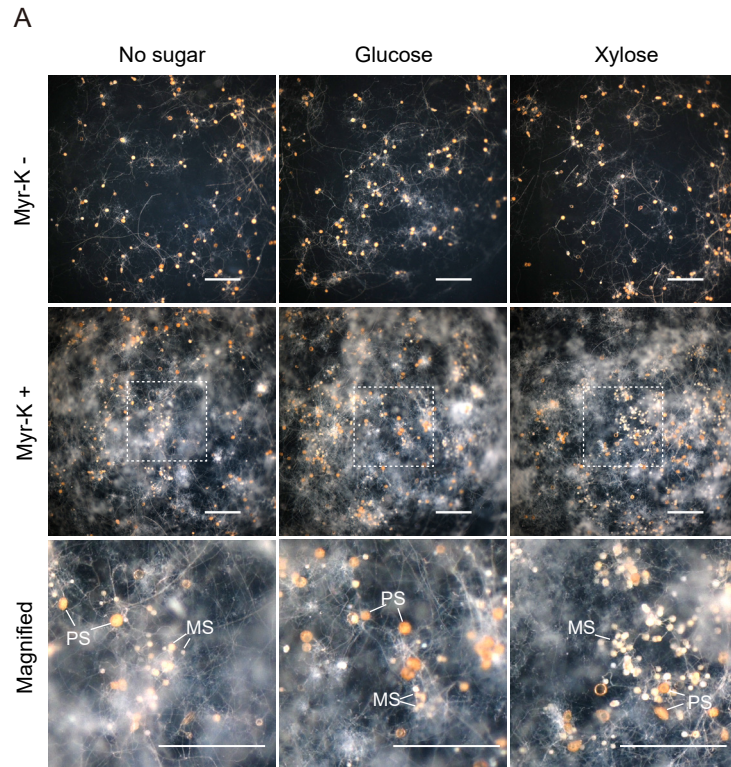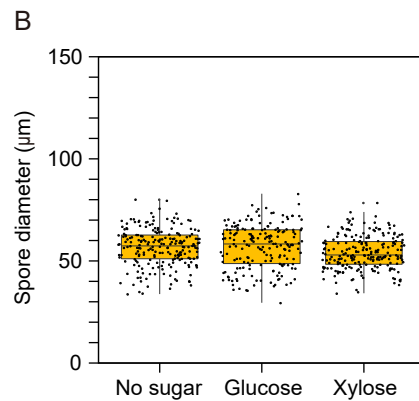

**Fig. S4.** Effects of sugars in combination with myristate on the growth and sporulation of *R. irregularis*. (A) Fungal growth in the immobilized cell culture containing half-strength modified SC medium supplemented with combinations of 0.5 mM potassium myristate and 5 mM sugars at two months after inoculation. Images were taken by a dissecting microscope. Lower panels show the magnified images of dotted areas in the middle panels. Yellow-orange spores are parent spores (PS) and small spores in white to light-yellow are myristate-induced spores (MS). Scale bars: 1 mm. (B) Size of the myristate-induced spores in immobilized cell culture system. Boxes show the first, median, and third quartiles; the whiskers extend to 1.5× interquartile range, and data points for each treatment are displayed.



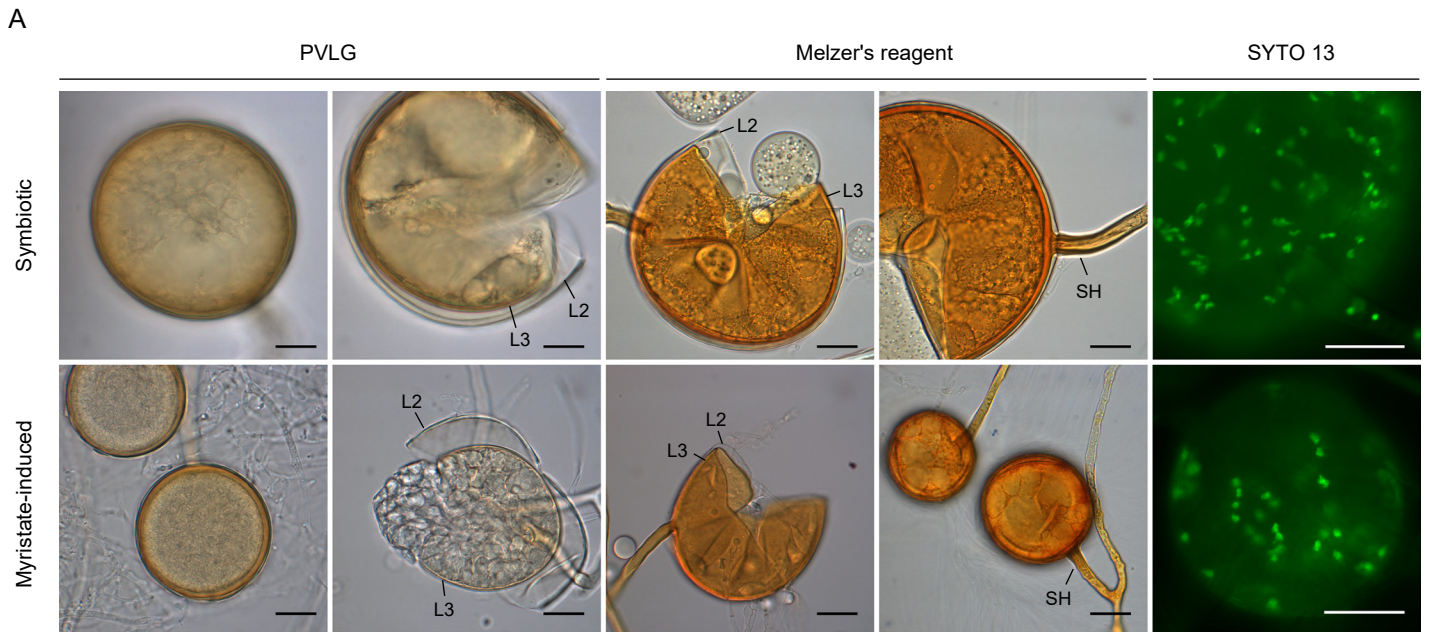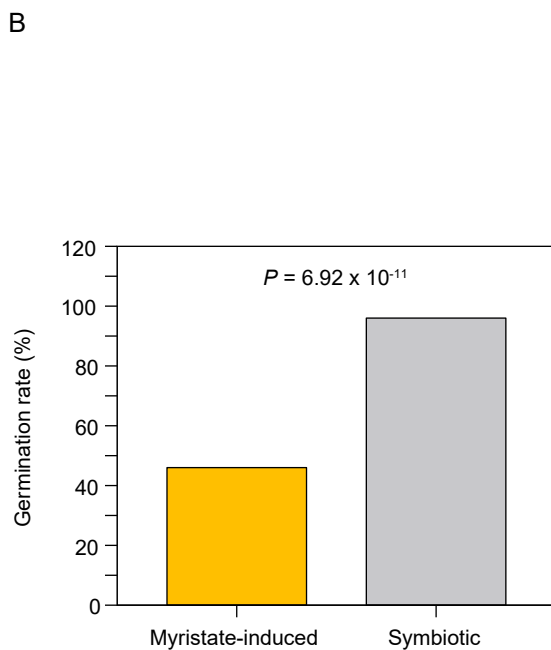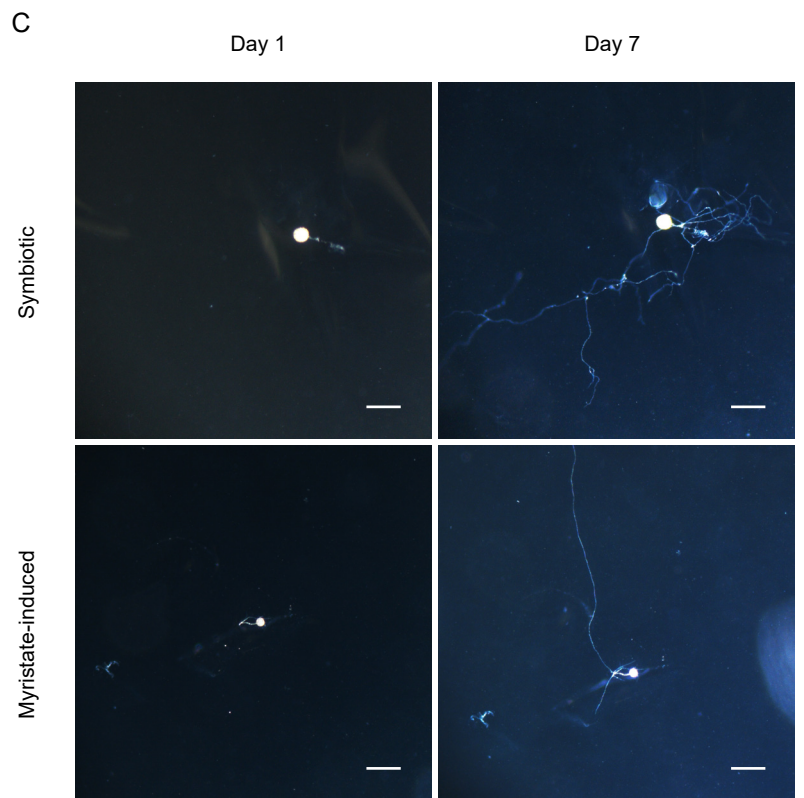

**Fig. S5.** Spore morphology and germination. (A) Myristate-induced and symbiotically generated spores of *R. irregularis*. Intact or crushed spores were mounted in PVLG or Melzer's reagent. Both spores appear yellow-brown in color and have apparent L2 and L3 spore walls. Only L3 was stained with Melzer's reagent. Spore size and thickness of L2 and L3 in the myristate-induced spores are less than those in the symbiotically generated spores. Subtending hyphae of both spores exhibit a cylindrical shape. Nuclei in the spores were stained with SYTO 13 green fluorescent nucleic acid stain and observed by epifluorescence microscopy. Many nuclei were observed in both spores. SH, subtending hypha. (B) Germination rate of the myristate-induced and symbiotically generated spores. In total, 50 myristate-induced spores and 77 symbiotic spores were tested on 0.3% Phytigel for 7 days. Myristate-induced spores were generated using an immobilized cell culture with a half-strength SC medium and 0.5 mM potassium myristate at 3 months after inoculation. The  $P$  value is based on Fisher's exact test. (C) Images of the germinating spores. Scale bars: 20  $\mu\text{m}$  (A) and 200  $\mu\text{m}$  (C).

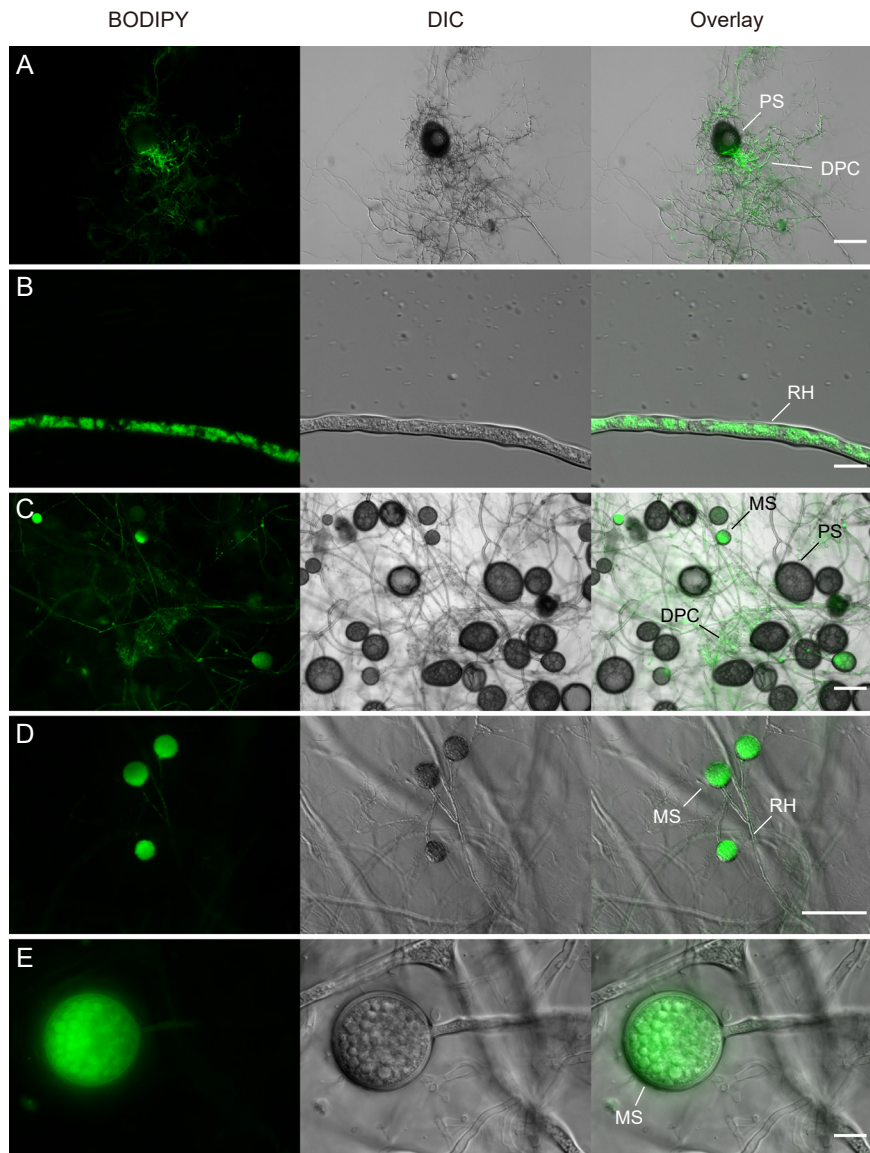

**Fig. S6.** Uptake of the fluorescently labelled fatty acid derivative  $C_1$ -BODIPY 500/510  $C_{12}$  by *R. irregularis*. Fluorescent images of  $C_1$ -BODIPY 500/510  $C_{12}$  and superimposed bright field images of *R. irregularis* cultivated using an immobilized cell culture system with the modified SC medium containing 0.5 mM of the fluorescent probe for 1 day (A, C, and D) or 5 days (B and E). (A) Parent spore and DPCs. (B) Runner hypha. (C) Parent spores and myristate-induced secondary spores. (D) Secondary spores formed along runner hypha. (E) Secondary spore. DPC, densely packed coil; MS, myristate-induced spore; PS: parent spore (inoculated spore); and RH, runner hypha. Scale bars: 100  $\mu$ m (A, C, and D) and 10  $\mu$ m (B and E).

**Table S1.** Composition of the modified SC medium without fatty acids.

| Chemicals                                       | mg L <sup>-1</sup> | Chemicals     | mg L <sup>-1</sup> |
|-------------------------------------------------|--------------------|---------------|--------------------|
| (NH <sub>4</sub> ) <sub>2</sub> SO <sub>4</sub> | 660                | Alanine       | 38                 |
| KH <sub>2</sub> PO <sub>4</sub>                 | 1000               | Arginine, HCl | 38                 |
| MgSO <sub>4</sub>                               | 500                | Asparagine    | 38                 |
| NaCl                                            | 100                | Aspartic acid | 38                 |
| CaCl <sub>2</sub>                               | 100                | Cysteine      | 38                 |
| Boric acid                                      | 0.5                | Glutamine     | 38                 |
| CuSO <sub>4</sub>                               | 0.04               | Glutamic acid | 38                 |
| KI                                              | 0.1                | Glycine       | 38                 |
| FeCl <sub>3</sub>                               | 0.2                | Histidine     | 38                 |
| MnSO <sub>4</sub>                               | 0.4                | Isoleucine    | 38                 |
| Na <sub>2</sub> MoO <sub>5</sub>                | 0.2                | Leucine       | 190                |
| ZnSO <sub>4</sub>                               | 0.4                | Lysine        | 38                 |
| Glycerol                                        | 92                 | Methionine    | 38                 |
| Biotin                                          | 0.02               | Phenylalanine | 38                 |
| Ca pantothenate                                 | 0.4                | Proline       | 38                 |
| Folic acid                                      | 0.002              | Serine        | 38                 |
| Inositol                                        | 40                 | Threonine     | 38                 |
| Niacin                                          | 5.4                | Tryptophan    | 38                 |
| Para-aminobenzoic acid                          | 4.2                | Tyrosine      | 38                 |
| Pyridoxine, HCl                                 | 0.4                | Valine        | 38                 |
| Pyridoxial phosphate                            | 5                  | Phytigel      | 3000               |
| Riboflavin                                      | 0.2                |               |                    |
| Thiamine, HCl                                   | 5.4                |               |                    |
| Adenine sulfate                                 | 9                  |               |                    |
| Uracil                                          | 38                 |               |                    |

**Table S2.** Samples used in the present study.

<sup>a</sup>Immobilized cell culture, <sup>b</sup>*in vitro* culture using carrot hairy roots, <sup>c</sup>weeks post-inoculation, <sup>d</sup>C, confocal laser scanning microscope; D, dissecting microscope; E, epifluorescence microscope; F, fully focused composite image; I, inverted microscope; and L, light microscope.

| Figure  | Culture          | Medium  | Fatty acid                                                                               | Sugar        | Wpi <sup>c</sup> | Replication | Microscopy <sup>d</sup> | Scale (μm) |
|---------|------------------|---------|------------------------------------------------------------------------------------------|--------------|------------------|-------------|-------------------------|------------|
| Fig. 1A | Solid            | SC      | None                                                                                     | None         | 8                | 4           | -                       | -          |
|         | Solid            | SC      | (0.05% BSA)                                                                              | None         | 8                | 3           | -                       | -          |
|         | Solid            | SC      | 1 mM potassium laurate                                                                   | None         | 8                | 4           | -                       | -          |
|         | Solid            | SC      | 1 mM lauric acid                                                                         | None         | 8                | 4           | -                       | -          |
|         | Solid            | SC      | 0.5 mM lauric acid-BSA                                                                   | None         | 8                | 4           | -                       | -          |
|         | Solid            | SC      | 1 mM potassium myristate (Myr-K)                                                         | None         | 8                | 4           | -                       | -          |
|         | Solid            | SC      | 1 mM myristic acid                                                                       | None         | 8                | 4           | -                       | -          |
|         | Solid            | SC      | 0.5 mM myristic acid-BSA                                                                 | None         | 8                | 4           | -                       | -          |
|         | Solid            | SC      | 1 mM potassium palmitate                                                                 | None         | 8                | 4           | -                       | -          |
|         | Solid            | SC      | 1 mM palmitic acid                                                                       | None         | 8                | 3           | -                       | -          |
|         | Solid            | SC      | 0.5 mM palmitic acid-BSA                                                                 | None         | 8                | 4           | -                       | -          |
|         | Solid            | SC      | 1 mM palmitoleic acid                                                                    | None         | 8                | 3           | -                       | -          |
|         | Solid            | SC      | 0.5 mM stearic acid-BSA                                                                  | None         | 8                | 4           | -                       | -          |
|         | Solid            | SC      | 0.5 mM oleic acid-BSA                                                                    | None         | 8                | 4           | -                       | -          |
|         | Solid            | SC      | 1 mM C14:0 <i>sn</i> -2 monoacylglycerol                                                 | None         | 8                | 4           | -                       | -          |
|         | Solid            | SC      | 1 mM C16:0 <i>sn</i> -2 monoacylglycerol                                                 | None         | 8                | 4           | -                       | -          |
|         | Fig. 1B          | Solid   | SC                                                                                       | None         | None             | 2, 4, 6, 8  | 6                       | -          |
| Solid   |                  | SC      | 0.2 mM Myr-K                                                                             | None         | 2, 4, 6, 8       | 5-6         | -                       | -          |
| Solid   |                  | SC      | 0.5 mM Myr-K                                                                             | None         | 2, 4, 6, 8       | 5-6         | -                       | -          |
| Solid   |                  | SC      | 1.0 mM Myr-K                                                                             | None         | 2, 4, 6, 8       | 5-6         | -                       | -          |
| Fig. 1C | ICC <sup>a</sup> | 0.5× SC | None                                                                                     | None         | 8                | 6           | -                       | -          |
|         | ICC              | 0.5× SC | 0.5 mM Myr-K                                                                             | None         | 8                | 6           | -                       | -          |
|         | ICC              | 0.5× SC | None                                                                                     | 5 mM glucose | 8                | 6           | -                       | -          |
|         | ICC              | 0.5× SC | 0.5 mM Myr-K                                                                             | 5 mM glucose | 8                | 6           | -                       | -          |
|         | ICC              | 0.5× SC | None                                                                                     | 5 mM xylose  | 8                | 6           | -                       | -          |
|         | ICC              | 0.5× SC | 0.5 mM Myr-K                                                                             | 5 mM xylose  | 8                | 6           | -                       | -          |
| Fig. 1D | Solid            | SC      | None                                                                                     | None         | 2                | -           | I                       | 200        |
| Fig. 1E | Solid            | SC      | None                                                                                     | None         | 8                | -           | D                       | 200        |
| Fig. 1F | Solid            | SC      | 1 mM Myr-K                                                                               | None         | 8                | -           | D                       | 200        |
| Fig. 1G | Solid            | SC      | 1 mM Myr-K                                                                               | None         | 2                | -           | I                       | 200        |
| Fig. 1H | Solid            | SC      | 1 mM Myr-K                                                                               | None         | 8                | -           | D                       | 1,000      |
| Fig. 1I | Solid            | SC      | 1 mM Myr-K                                                                               | None         | 5                | -           | I, F                    | 200        |
| Fig. 1J | Solid            | SC      | 1 mM Myr-K                                                                               | None         | 5                | -           | I, F                    | 200        |
| Fig. 1K | Solid            | SC      | 1 mM Myr-K                                                                               | None         | 5                | -           | I, F                    | 200        |
| Fig. 1L | Solid            | SC      | 1 mM Myr-K                                                                               | None         | 5                | -           | I, F                    | 200        |
| Fig. 1M | Solid            | SC      | 1 mM Myr-K                                                                               | None         | 5                | -           | I, F                    | 200        |
| Fig. 1N | Solid            | SC      | 1 mM Myr-K                                                                               | None         | 8                | -           | D                       | 200        |
| Fig. 1O | Solid            | SC      | 1 mM Myr-K                                                                               | None         | 5                | -           | I                       | 200        |
| Fig. 1P | Solid            | SC      | 1 mM Myr-K                                                                               | None         | 5                | -           | I                       | 200        |
| Fig. 1Q | ICC              | 0.5× SC | None                                                                                     | None         | 8                | -           | D                       | 1,000      |
| Fig. 1R | ICC              | 0.5× SC | 0.5 mM Myr-K                                                                             | None         | 8                | -           | D                       | 1,000      |
| Fig. 2A | Solid            | SC      | None                                                                                     | None         | 2, 4, 6, 8       | 3           | -                       | -          |
|         | Solid            | SC      | 0.2 mM Myr-K                                                                             | None         | 2, 4, 6, 8       | 5-6         | -                       | -          |
|         | Solid            | SC      | 0.5 mM Myr-K                                                                             | None         | 2, 4, 6, 8       | 5-6         | -                       | -          |
| Fig. 2B | Solid            | SC      | None                                                                                     | None         | 8                | 4           | -                       | -          |
|         | Solid            | SC      | 0.2 mM Myr-K                                                                             | None         | 8                | 205         | -                       | -          |
|         | Solid            | SC      | 0.5 mM Myr-K                                                                             | None         | 8                | 268         | -                       | -          |
|         | Liquid           | SC      | None                                                                                     | None         | 0                | 206         | -                       | -          |
| Fig. 2C | ICC              | 0.5× SC | 0.5 mM Myr-K                                                                             | None         | 8                | 6           | -                       | -          |
|         | ICC              | 0.5× SC | 0.5 mM Myr-K                                                                             | 5 mM glucose | 8                | 6           | -                       | -          |
|         | ICC              | 0.5× SC | 0.5 mM Myr-K                                                                             | 5 mM xylose  | 8                | 6           | -                       | -          |
| Fig. 2D | Monogenic        | M       | None                                                                                     | 1% sucrose   | 1                | -           | D                       | 500        |
| Fig. 2E | Monogenic        | M       | None                                                                                     | 1% sucrose   | 5                | -           | D                       | 500        |
| Fig. 2F | Monogenic        | M       | None                                                                                     | 1% sucrose   | 14               | -           | D                       | 500        |
| Fig. 2G | Monogenic        | M       | None                                                                                     | 1% sucrose   | 11               | -           | L                       | 500        |
| Fig. 3A | ICC              | SC      | 0.5 mM Myr-K (6 weeks) -> 0.5 mM C <sub>1</sub> -BODIPY 500/510 C <sub>12</sub> (10 min) | None         | 3                | -           | C                       | 200        |
| Fig. 3B | Solid            | SC      | 1 mM <sup>13</sup> C <sub>1</sub> -myristic acid                                         | None         | 10               | 1           | -                       | -          |
| Fig. 3C | Solid            | SC      | 1 mM myristic acid                                                                       | None         | 8                | 5           | -                       | -          |
|         | Solid            | SC      | 1 mM <sup>13</sup> C <sub>1</sub> -myristic acid                                         | None         | 8                | 5           | -                       | -          |
| Fig. 3D | Liquid           | Water   | None (5 days) -> none (12 h)                                                             | None         | 5 days           | 4           | -                       | -          |
|         | Liquid           | Water   | None (5 days) -> 0.5 mM Myr-K (12 h)                                                     | None         | 5 days           | 4           | -                       | -          |
|         | Liquid           | Water   | None (5 days) -> 50 μM CCCP (12 h)                                                       | None         | 5 days           | 4           | -                       | -          |
|         | Liquid           | Water   | None (5 days) -> 50 μM CCCP + 0.5 mM Myr-K (12 h)                                        | None         | 5 days           | 4           | -                       | -          |
| Fig. 3E | ICC              | SC      | 0.5 mM Myr-K (3 weeks) -> none (11 days) -> none (3 h)                                   | None         | 4                | 5-6         | -                       | -          |
|         | ICC              | SC      | 0.5 mM Myr-K (3 weeks) -> none (11 days) -> 0.5 mM Myr-K (3 h)                           | None         | 4                | 5-6         | -                       | -          |



Table S2. Continued.

| Figure   | Culture | Medium  | Fatty acid                                                                               | Sugar        | Wpi <sup>c</sup> | Replication | Microscopy <sup>d</sup> | Scale (μm) |
|----------|---------|---------|------------------------------------------------------------------------------------------|--------------|------------------|-------------|-------------------------|------------|
| Fig. S1A | Solid   | SC      | None                                                                                     | None         | 0, 8             | -           | D                       | 1,000      |
|          | Solid   | SC      | 1 mM potassium laurate                                                                   | None         | 0, 8             | -           | D                       | 1,000      |
|          | Solid   | SC      | 1 mM Myr-K                                                                               | None         | 0, 8             | -           | D                       | 1,000      |
|          | Solid   | SC      | 1 mM potassium palmitate                                                                 | None         | 0, 8             | -           | D                       | 1,000      |
| Fig. S1B | Solid   | SC      | 1 mM lauric acid                                                                         | None         | 8                | -           | D                       | 500, 1,000 |
|          | Solid   | SC      | 1 mM myristic acid                                                                       | None         | 8                | -           | D                       | 500, 1,000 |
|          | Solid   | SC      | 1 mM palmitic acid                                                                       | None         | 8                | -           | D                       | 500, 1,000 |
|          | Solid   | SC      | 1 mM palmitoleic acid                                                                    | None         | 8                | -           | D                       | 500, 1,000 |
|          | Solid   | SC      | 1 mM C14:0 <i>sn</i> -2 monoacylglycerol                                                 | None         | 8                | -           | D                       | 500, 1,000 |
|          | Solid   | SC      | 1 mM C16:0 <i>sn</i> -2 monoacylglycerol                                                 | None         | 8                | -           | D                       | 500, 1,000 |
|          | Solid   | SC      | (0.05% BSA)                                                                              | None         | 8                | -           | D                       | 500, 1,000 |
| Fig. S1C | Solid   | SC      | 0.5 mM lauric acid-BSA                                                                   | None         | 8                | -           | D                       | 500, 1,000 |
|          | Solid   | SC      | 0.5 mM myristic acid-BSA                                                                 | None         | 8                | -           | D                       | 500, 1,000 |
|          | Solid   | SC      | 0.5 mM palmitic acid-BSA                                                                 | None         | 8                | -           | D                       | 500, 1,000 |
|          | Solid   | SC      | 0.5 mM stearic acid-BSA                                                                  | None         | 8                | -           | D                       | 500, 1,000 |
|          | Solid   | SC      | 0.5 mM oleic acid-BSA                                                                    | None         | 8                | -           | D                       | 500, 1,000 |
| Fig. S1D | Solid   | SC      | (0.05% BSA)                                                                              | None         | 8                | -           | D                       | 1,000      |
|          | Solid   | SC      | 0.001 mM lauric acid-BSA                                                                 | None         | 8                | -           | D                       | 1,000      |
|          | Solid   | SC      | 0.01 mM lauric acid-BSA                                                                  | None         | 8                | -           | D                       | 1,000      |
|          | Solid   | SC      | 0.1 mM lauric acid-BSA                                                                   | None         | 8                | -           | D                       | 1,000      |
| Fig. S2A | Liquid  | SC      | None                                                                                     | None         | 8                | 3           | -                       | -          |
|          | Liquid  | SC      | 0.5 mM Myr-K                                                                             | None         | 8                | 3           | -                       | -          |
| Fig. S2B | Liquid  | SC      | None                                                                                     | None         | 0, 1, 2, 4, 8    | -           | D                       | 1,000      |
|          | Liquid  | SC      | 0.5 mM Myr-K                                                                             | None         | 0, 1, 2, 4, 8    | -           | D                       | 1,000      |
| Fig. S2C | Liquid  | SC      | None                                                                                     | None         | 8                | -           | I                       | 200        |
|          | Liquid  | SC      | 0.5 mM Myr-K                                                                             | None         | 8                | -           | I                       | 200        |
| Fig. S3A | ICC     | 0.5× SC | 0.5 mM Myr-K                                                                             | None         | 0                | -           | D                       | 10,000     |
| Fig. S3B | ICC     | 0.5× SC | 0.5 mM Myr-K                                                                             | None         | 8                | -           | D                       | 10,000     |
| Fig. S3C | ICC     | 0.5× SC | 0.5 mM Myr-K                                                                             | None         | 8                | -           | D                       | 1,000      |
| Fig. S3D | ICC     | 0.5× SC | 0.5 mM Myr-K                                                                             | None         | 8                | -           | D                       | 1,000      |
| Fig. S3E | ICC     | 0.5× SC | 0.5 mM Myr-K                                                                             | None         | 8                | -           | I                       | 1,000      |
| Fig. S3F | ICC     | 0.5× SC | 0.5 mM Myr-K                                                                             | None         | 8                | -           | I                       | 1,000      |
| Fig. S3G | ICC     | 0.5× SC | 0.5 mM Myr-K                                                                             | None         | 8                | -           | I                       | 100        |
| Fig. S3H | ICC     | 0.5× SC | 0.5 mM Myr-K                                                                             | None         | 8                | -           | I                       | 1,000      |
| Fig. S3I | ICC     | 0.5× SC | 0.5 mM Myr-K                                                                             | None         | 8                | -           | I                       | 100        |
| Fig. S3J | ICC     | 0.5× SC | 0.5 mM Myr-K                                                                             | None         | 8                | -           | I                       | 100        |
| Fig. S4A | ICC     | 0.5× SC | None                                                                                     | None         | 8                | -           | D                       | 1,000      |
|          | ICC     | 0.5× SC | 0.5 mM Myr-K                                                                             | None         | 8                | -           | D                       | 1,000      |
|          | ICC     | 0.5× SC | None                                                                                     | 5 mM glucose | 8                | -           | D                       | 1,000      |
|          | ICC     | 0.5× SC | 0.5 mM Myr-K                                                                             | 5 mM glucose | 8                | -           | D                       | 1,000      |
|          | ICC     | 0.5× SC | None                                                                                     | 5 mM xylose  | 8                | -           | D                       | 1,000      |
|          | ICC     | 0.5× SC | 0.5 mM Myr-K                                                                             | 5 mM xylose  | 8                | -           | D                       | 1,000      |
| Fig. S4B | ICC     | 0.5× SC | 0.5 mM Myr-K                                                                             | None         | 8                | 211         | -                       | -          |
|          | ICC     | 0.5× SC | 0.5 mM Myr-K                                                                             | 5 mM glucose | 8                | 218         | -                       | -          |
|          | ICC     | 0.5× SC | 0.5 mM Myr-K                                                                             | 5 mM xylose  | 8                | 188         | -                       | -          |
| Fig. S5A | ICC     | 0.5x SC | 0.5 mM Myr-K                                                                             | None         | 12               | -           | L, E                    | 20         |
| Fig. S5B | ICC     | 0.5x SC | 0.5 mM Myr-K (12 weeks) -> Phytigel plate (1 week)                                       | None         | 12               | 50, 77      | -                       | -          |
| Fig. S5C | ICC     | 0.5x SC | 0.5 mM Myr-K (12 weeks) -> Phytigel plate (0 or 1 week)                                  | None         | 12               | -           | D                       | 200        |
| Fig. S6A | ICC     | SC      | 0.5 mM Myr-K (6 weeks) -> 0.5 mM C <sub>1</sub> -BODIPY 500/510 C <sub>12</sub> (1 days) | None         | 6                | -           | E                       | 100        |
| Fig. S6B | ICC     | SC      | 0.5 mM Myr-K (6 weeks) -> 0.5 mM C <sub>1</sub> -BODIPY 500/510 C <sub>12</sub> (5 days) | None         | 6                | -           | E                       | 10         |
| Fig. S6C | ICC     | SC      | 0.5 mM Myr-K (6 weeks) -> 0.5 mM C <sub>1</sub> -BODIPY 500/510 C <sub>12</sub> (1 days) | None         | 6                | -           | E                       | 100        |
| Fig. S6D | ICC     | SC      | 0.5 mM Myr-K (6 weeks) -> 0.5 mM C <sub>1</sub> -BODIPY 500/510 C <sub>12</sub> (1 days) | None         | 6                | -           | E                       | 100        |
| Fig. S6E | ICC     | SC      | 0.5 mM Myr-K (6 weeks) -> 0.5 mM C <sub>1</sub> -BODIPY 500/510 C <sub>12</sub> (5 days) | None         | 6                | -           | E                       | 10         |
| Movie S1 | ICC     | SC      | 0.5 mM Myr-K (6 weeks) -> 0.5 mM C <sub>1</sub> -BODIPY 500/510 C <sub>12</sub> (10 min) | None         | 3                | -           | C                       | 25         |

**Table S3.** Infection capability of myristate-induced spores. Carrot hairy roots were inoculated with a single myristate-induced spore and grown for two months. Six independent experiments were performed.

| Trial   | Number of inoculated spores | Germination rate (%) | Rate of spores which colonize to roots and produce next generation spores (%) |                      |
|---------|-----------------------------|----------------------|-------------------------------------------------------------------------------|----------------------|
|         |                             |                      | per inoculated spore                                                          | per germinated spore |
| Trial 1 | 20                          | 30                   | 15                                                                            | 50                   |
| Trial 2 | 40                          | 33                   | 18                                                                            | 54                   |
| Trial 3 | 29                          | 7                    | 3                                                                             | 50                   |
| Trial 4 | 40                          | 20                   | 13                                                                            | 63                   |
| Trial 5 | 60                          | 12                   | 2                                                                             | 14                   |
| Trial 6 | 56                          | 5                    | 4                                                                             | 67                   |

**Table S4.** Primers used in this study.

| Gene         | RIR ID <sup>a</sup> | Annotation                                   | Sequence                                            | Reference                       |
|--------------|---------------------|----------------------------------------------|-----------------------------------------------------|---------------------------------|
| <i>FAD1</i>  | RIR_0930900         | Acyl-CoA dehydrogenase                       | TGGTATTCATTCGTGCCATGA<br>GCAGCGCGTGCAAGTG           | This study                      |
| <i>FAL3</i>  | RIR_0764900         | Acyl-CoA ligase                              | TCAAAAAGATGCCAAAGTGACAAT<br>AACCTTGTGTTACGAGCATCCA  | This study                      |
| <i>FAL4</i>  | RIR_2539500         | Acyl-CoA ligase                              | ATTGTAGAGGGTTATGGGCAGACT<br>TTTCGCCTCGAAGACCAACT    | This study                      |
| <i>ICL1</i>  | RIR_1924000         | Isocitrate lyase                             | CCGCGCCATAGCGTATG<br>TAGGTTTTGCAGTCTCCATCCA         | This study                      |
| <i>PCK2</i>  | RIR_2338300         | Phosphoenolpyruvate carboxykinase            | AAAAACTTGAAAGGTCCTCAAGA<br>AGAAATCTCGCAGCTAACGAATCT | This study                      |
| <i>FBP1</i>  | RIR_2783400         | Fructose-1,6-bisphosphate phosphatase        | CGCGTATCCCCTGATAAAA<br>GGAAAGCCATAGGAAAACATTCA      | This study                      |
| <i>CIT1</i>  | RIR_0822400         | Citrate synthase                             | CTACATGGCCTTGCTAATCAAGAA<br>CACCAATCGCGTCTCTCATCT   | This study                      |
| <i>ACH1</i>  | RIR_2973500         | Aconitate hydratase                          | CTTCCCGGGTGGTCTTATGA<br>ACCCAAACCACCAGCGTTAG        | This study                      |
| <i>ICD1</i>  | RIR_1281200         | Isocitrate dehydrogenase                     | AGCGGATCGGCCAGAAC<br>CAAGGGTAAAATCGGTTGTTGTAGA      | This study                      |
| <i>KGD2</i>  | RIR_2870300         | 2-Ketoglutarate dehydrogenase                | TTGTACGGTGATCGCGAAGA<br>GGCAATACGTAGACGCATCCTAT     | This study                      |
| <i>MDH1</i>  | RIR_0715300         | Malate dehydrogenase                         | GAAGTTGTTAAAGCCAAGGATGGT<br>ACCAGCCTGTGCCATTGAA     | This study                      |
| <i>NMT1</i>  | RIR_3261900         | <i>N</i> -myristoyltransferase               | CGATGCGATGTTTCGCTTT<br>GGTGGTTGAAGAGCCCATTTT        | This study                      |
| <i>EF-1β</i> | RIR_3067400         | Translation elongation factor 1 subunit beta | CCCATGCAGCTCGATGGTA<br>TGCCAGGAAGTGAAGAAAATGA       | Kobae et al., 2015 <sup>b</sup> |

<sup>a</sup>Maeda et al., Evidence of non-tandemly repeated rDNAs and their intragenomic heterogeneity in *Rhizophagus irregularis*. *Commun. Biol.* **1**, 87 (2018).

<sup>b</sup>Kobae et al., Up-regulation of genes involved in *N*-acetylglucosamine uptake and metabolism suggests a recycling mode of chitin in intraradical mycelium of arbuscular mycorrhizal fungi. *Mycorrhiza* **25**, 411-417 (2015).
